# 1 Platelet transcriptome yields progressive markers in chronic 2 myeloproliferative neoplasms and identifies putative targets of therapy

3  
4 Zhu Shen<sup>1</sup>, Wenfei Du<sup>1</sup>, Cecelia Perkins<sup>2</sup>, Lenn Fechter<sup>2</sup>, Vanita Natu<sup>3</sup>, Holden Maecker<sup>4</sup>, Jesse Rowley<sup>5</sup>,  
5 Jason Gotlib<sup>2,6,8</sup>, James Zehnder<sup>2,6,7,8</sup>, and Anandi Krishnan<sup>2,7\*</sup>

## 6 7 Affiliations

8 <sup>1</sup>Department of Statistics, Stanford University, Stanford, CA

9 <sup>2</sup>Stanford Cancer Institute, Stanford University School of Medicine, Stanford, CA

10 <sup>3</sup>Stanford Functional Genomics Facility, Stanford University School of Medicine, Stanford, CA

11 <sup>4</sup>Department of Microbiology and Immunology, Stanford University School of Medicine, Stanford, CA

12 <sup>5</sup>Department of Internal Medicine, University of Utah, Salt Lake City, UT

13 <sup>6</sup>Department of Medicine, Stanford University School of Medicine, Stanford, CA

14 <sup>7</sup>Department of Pathology, Stanford University, Stanford, CA

15 <sup>8</sup>These authors contributed equally

## 16 17 \*Corresponding Author:

18 Anandi Krishnan, PhD

19 Stanford University, Stanford, CA

20 [anandi.krishnan@stanford.edu](mailto:anandi.krishnan@stanford.edu)

## 21 22 23 24 Highlights

25 Leveraging two independent and mutually validating MPN patient cohorts, we identify progressive  
26 transcriptomic markers that also enable externally validated prediction in MPNs.

27  
28  
29 Our platelet RNA-Seq data identifies impaired protein homeostasis as prominent in MPN progression and  
30 offers putative targets of therapy.

31  
32  
33  
34  
35  
36  
37  
38  
39  
40  
41  
42  
43  
44  
45  
46  
47  
48  
49  
50

51 **Abstract**

52 Predicting disease progression remains a particularly challenging endeavor in chronic degenerative  
53 disorders and cancer, thus limiting early detection, risk stratification, and preventive interventions. Here,  
54 profiling the spectrum of chronic myeloproliferative neoplasms (MPNs) as a model, we identify the blood  
55 platelet transcriptome as a proxy for highly sensitive progression biomarkers that also enables prediction  
56 of advanced disease via machine learning algorithms. Using RNA sequencing (RNA-seq), we derive  
57 disease-relevant gene expression in purified platelets from 120 peripheral blood samples constituting two  
58 time-separated cohorts of patients diagnosed with one of three MPN subtypes at sample acquisition –  
59 essential thrombocythemia, ET (n=24), polycythemia vera, PV (n=33), and primary or post ET/PV secondary  
60 myelofibrosis, MF (n=42), and healthy donors (n=21). The MPN platelet transcriptome reveals an  
61 incremental molecular reprogramming that is independent of patient driver mutation status or therapy and  
62 discriminates each clinical phenotype. Leveraging this dataset that shows a characteristic progressive  
63 expression gradient across MPN, we develop a machine learning model (Lasso-penalized regression) and  
64 predict advanced subtype MF at high accuracy and under two conditions of external validation: i)  
65 temporal: our two Stanford cohorts, AUC-ROC of 0.96; and ii) geographical: independently published data  
66 of an additional n=25 MF and n=46 healthy donors, AUC-ROC of 0.97). Lasso-derived signatures offer a  
67 robust core set of < 5 MPN transcriptome markers that are progressive in expression. Mechanistic insights  
68 from our data highlight impaired protein homeostasis as a prominent driver of MPN evolution, with  
69 persistent integrated stress response. We also identify JAK inhibitor-specific signatures and other  
70 interferon, proliferation, and proteostasis-associated markers as putative targets for MPN-directed  
71 therapy. Our platelet transcriptome snapshot of chronic MPNs demonstrates a proof of principle for  
72 disease risk stratification and progression beyond genetic data alone, with potential utility in other  
73 progressive disorders.

74

75

76

77

78

79

80

81

82

## 83 **Introduction**

84 The classic Philadelphia chromosome-negative (Ph<sup>-</sup>) MPNs,(Barbui and Falanga, 2016; Finazzi et al., 2013;  
85 Spivak, 2017; Spivak et al., 2014) are clonal disorders of the bone marrow that comprise three clinical  
86 phenotypes– essential thrombocythemia (ET), polycythemia vera (PV), and myelofibrosis (MF). These  
87 myeloid neoplasms are defined by a combination of morphologic, clinical, laboratory, and  
88 cytogenetic/molecular genetic features. The existing genetic landscape (Rumi and Cazzola, 2017;  
89 Vainchenker and Kralovics, 2017; Zoi and Cross, 2017) of MPNs primarily involves mutations in three driver  
90 genes that lead to constitutive JAK-STAT signaling (*JAK2*, *CALR*, *MPL*). Several additional non-driver  
91 mutations (see references (Hinds et al., 2016; Nguyen and Gotlib, 2012; Oh and Gotlib, 2010; Rampal et  
92 al., 2014; Rumi and Cazzola, 2017; Vainchenker and Kralovics, 2017; Zoi and Cross, 2017) for details) as  
93 well as cytogenetic (Spivak, 2017) and epigenetic (Mascarenhas et al., 2011; Tefferi et al., 2011)  
94 abnormalities also contribute to disease initiation and progression, and impact both overall survival and  
95 potential for progression to acute myeloid leukemia (AML) (Papaemmanuil et al., 2016). Depending on the  
96 MPN and stage of disease, these patients may exhibit debilitating constitutional symptoms such as  
97 fatigue, pruritus, night sweats, and weight loss; thrombohemorrhagic diathesis and extramedullary  
98 hematopoiesis; and an increased propensity for transformation to AML. Although an increase in one or  
99 more blood cell lineages contributes to these morbid sequelae, the qualitative abnormalities of myeloid  
100 cells that increase vascular risk or disease progression are not well understood. Taken together, a limited  
101 understanding exists regarding how genotypic variability contributes to diverse phenotypic presentations  
102 and disease natural histories. We were motivated by the current clinical need (Rumi and Cazzola, 2017;  
103 Spivak, 2017; Vainchenker and Kralovics, 2017) and the potential for deeper integration of clinical features  
104 and genetics with gene expression profiling to improve stratification and management of chronic blood  
105 disorders, such as MPNs.

106

107 Blood platelets play critical roles in multiple processes and diseases (Rondina et al., 2013; Weyrich, 2014;  
108 Weyrich and Zimmerman, 2013), from their traditional function in hemostasis and wound healing to  
109 inflammation, immunity, cancer metastasis, and angiogenesis. Platelets originate from bone marrow

110 precursor megakaryocytes as anucleate fragments with a distinctive discoid shape. Platelets contain a  
111 complex transcriptional landscape of messenger RNAs (mRNAs), unspliced pre-mRNAs, rRNAs, tRNAs  
112 and microRNAs (Rowley et al., 2012; Schubert et al., 2014; Simon et al., 2014; Weyrich, 2014). Most  
113 platelet RNA expression results from the transcription of nuclear DNA in the megakaryocyte (Davizon-  
114 Castillo et al., 2020; Rowley et al., 2012), and thus reflects the status of the megakaryocyte at the time of  
115 platelet release into the circulation, as well as subsequent splicing events, and selective packaging and  
116 inter-cellular RNA transfer. There is emerging evidence (Best et al., 2015; Campbell et al., 2018; Clancy  
117 and Freedman, 2016; Cunin et al., 2019; Middleton et al., 2019) that the molecular signature of platelets  
118 may be changed in disease conditions where these processes are altered, including via inter-cellular  
119 transfer (Clancy and Freedman, 2016; Cunin et al., 2019) of cytosolic RNA. In the context of MPNs, the  
120 platelet transcriptome therefore not only represents a critical biomarker of megakaryocytic activity (Gilles et  
121 al., 2012; Krause and Crispino, 2013; Wen et al., 2016; Wen et al., 2015; Woods et al., 2019), but also  
122 provides a snapshot of the underlying hemostatic, thrombotic, and inflammatory derangements associated  
123 with these hematologic neoplasms and the potential impact of treatment (Woods et al., 2019).

124  
125 To date, no one composite study (Krishnan et al., 2017) (Gangaraju et al., 2020; Guo et al., 2019; Rampal  
126 et al., 2014; Schischlik et al., 2019; Skov et al., 2011; Skov et al., 2012) has evaluated the disease-relevant  
127 platelet transcriptome in a sizeable clinical cohort of all three subtypes of Ph<sup>-</sup> MPNs. Here, we extend our  
128 prior preliminary work (Krishnan et al., 2017) toward a comprehensive analysis of disease-relevant  
129 (Cummings et al., 2017) platelet RNA-sequencing (RNA-seq) in two temporally independent and mutually  
130 validating cohorts of all three MPN subtypes, ET, PV, and MF (primary or post ET/PV secondary). We  
131 demonstrate marked differences in platelet gene expression across the MPN spectrum, which also permits  
132 robust validated (temporal and geographical) prediction of MF. In addition to identifying novel gene  
133 expression signatures impacted by the JAK1/JAK2 inhibitor ruxolitinib (RUX), platelet profiling reveals  
134 MPN-altered pathways that may be targets for future drug development.

135

136

137

138 **Results**

139 **Two independent MPN clinical cohorts and closely replicated platelet transcriptome**

140 We prepared highly purified leukocyte-depleted (Amisten, 2012; Rowley et al., 2011) platelets from  
141 peripheral blood samples of two cohorts (approximately 2 years apart; Stanford single-center) of patients  
142 with a diagnosis of MPN (including provisional) at the time of sample acquisition, and included healthy  
143 controls in each cohort as reference (cohort 1, n = 71, and cohort 2, n=49; **Figure 1, Table S1A-B**). Only 2  
144 patients (2%) received a change in diagnosis from MPN (MF) to a non-MPN phenotype; and were therefore  
145 excluded from all downstream analyses (**Figure 2A** principal component analysis plot panel-3 identifies  
146 these 2 outliers). Our two-cohort study was specifically designed (before knowledge of other subsequent  
147 studies) for the explicit purpose of validation, not only of inter-cohort RNA-seq results (Kukurba and  
148 Montgomery, 2015) but also to evaluate temporal validation (Moons et al., 2012) of our prediction model  
149 (see Methods, **Figure 5C,E,F**). **Figure S1** demonstrates our established (Rowley et al., 2011; Rowley et al.,  
150 2019) high-quality and highly efficient experimental framework toward a rigorous platelet RNA-seq  
151 approach. Clinical features of the MPN patients are shown in **Figure 1**; and listed in **Table S1A-B**. The  
152 distribution of key variables was closely matched between the two cohorts by MPN subtype (**Figure 1A**),  
153 age (**B**), gender (**C**), *JAK2/CALR* mutation status (**D**) and treatment (**E**). Any inter-patient variability in  
154 patient age, gender and treatment were adjusted as confounding factors in all downstream gene  
155 expression analyses (see Methods). Clinical laboratory measures (**Figure 1F**) at the time of sampling  
156 reflected the phenotype of the MPN subtypes (please see figure legend for detailed statistical  
157 comparisons). The two cohorts of platelet transcriptome data (**Figure 1G**, normalized transcript counts)  
158 adjusted for patient age, gender and all treatment as confounding factors were also highly correlated ( $R^2 =$   
159 0.89), thus demonstrating high inter-cohort validation of gene expression that then enabled us to combine  
160 our two RNA-seq datasets into a final integrated data set of enhanced statistical power for downstream  
161 analyses, especially prediction modeling (**Figure 5**). Together, this platelet transcriptome compendium  
162 comprises 118 human peripheral blood samples from healthy controls (n=21) and World Health  
163 Organization-defined MPN patients (24 ET, 33 PV and 40 MF) that include seven untreated, and 92 either  
164 on cytoreductives/biologics (e.g. ruxolitinib, hydroxyurea, interferon-alpha), anti-thrombotic agents (e.g.

165 aspirin, warfarin), or a combination and captures the real-life diversity among MPN patients. Our cross-  
166 sectional design here capturing patients from all three MPN subtypes also serves as a practical alternative  
167 to the longitudinal approach, though ideal, is likely difficult to implement in these chronic disorders with  
168 often decades of disease.

169

## 170 **MPN platelet transcriptome distinguishes disease phenotype and reveals phenotype- and JAK-** 171 **inhibitor specific signatures**

172 Given the phenotypic overlap, yet also differences in disease behavior and prognosis between ET, PV and  
173 MF, we hypothesized that there may be MPN subtype-specific differences in gene expression that are  
174 independent of *JAK2/CALR/MPL* mutation status. In addition, we hypothesized that MPN platelets are  
175 likely to be enriched for subtype-specific biomarkers that may otherwise be missed in blood/plasma/serum  
176 sources (Schischlik et al., 2019; Skov et al., 2011; Skov et al., 2012). Therefore, we compared platelet  
177 transcriptomic expression in each of the three MPN subtypes with that of controls and discovered a  
178 shared gene set that is also progressively differentiated across the MPN spectrum (ET/PV to MF **Figure 2**  
179 **A-C**). First, unsupervised principal component analysis (PCA) of MPN patients and controls data (**Figure**  
180 **2A**) confirmed that the collective variability from the first two principal components (accounting for 48% of  
181 total variance), after adjusting for age, gender, treatment and experimental batch, was MPN disease  
182 status, with increasing differentiation by subtype. Next, differential gene expression analysis (DGEA,  
183 volcano plot, **Figure 2B, C**) efficiently distinguished each of the MPN subtypes and resulted in highly  
184 significant expression signatures (adjusted p-value/FDR <0.05) with 2634 genes differentially regulated in  
185 ET (1364 up and 1269 down), 4398 in PV (2098 up and 2300 down), and 6648 in MF (3965 up and 2683  
186 down). A subset of 100+ long non-coding RNAs and pseudogenes also constituted the significant  
187 (FDR<0.05) differential expression across MPNs (**Table S2A-C**).

188 Specifically, DGEA also uncovered shared and unique genes between all three MPN phenotypes, thus  
189 offering a potential core set of genes involved in MPN pathogenesis (**Figure 2C**, with associated heatmaps  
190 in Figure 3 and pathways in Figure 4). The shared gene set at FDR < 0.05 constituted 654 up-regulated  
191 genes, with a predominance of molecular pathways involving *myeloid cell activation in immune response*

192 *and membrane protein proteolysis*; and 361 down-regulated genes, reflecting negative regulation of  
193 hematopoiesis and negative regulation of transmembrane receptor protein serine/threonine kinase  
194 signaling as a consistent pathogenetic mechanism. The upregulated genes belonged to the endoplasmic  
195 reticulum/ER-Golgi intermediate compartment, and included a particularly high expression of the cAMP-  
196 response element binding transcription factor, *CREB3L1* (Sampieri et al., 2019) implicated in cell  
197 differentiation and inhibition of cell proliferation, with concomitant high expression of ER chaperones (Clark  
198 et al., 2002) calreticulin (*CALR*), calnexin (*CANX*); transport factors: golgin (*GOLGB1*) and folate receptor  
199 *FOLR1*. Platelet alpha granule proteins (*F5*, *VWF*, *MMP14*), several collagens (*COL10A1*, *COL18A1*,  
200 *COL6A3*), immune/inflammatory (*IFITM2/3/10*, *FCGR2A*, *TMEM179B*), *Cathepsins* (*C/Z/D*, *MIF*, *PTGES2*)  
201 and proliferation mediator genes (*CDK1*, *CCNG1*, *BMP9/GDF2*, *LAPTM4B*, *PSENEN*) also constituted the  
202 MPN shared set. Downregulated genes, on the other hand, were predominantly within transcription factor  
203 complexes, and included opposing expression of *CREB1* (vis-à-vis *CREB3L1* above), calcium-calmodulin  
204 protein kinases, *CAMK4*, *SMAD1* and  $\beta$ -catenin *CTNNB1* together pointing to dysregulated calcium ( $Ca^{2+}$ )  
205 homeostasis in the ER lumen.

206 Differential markers in each of ET, PV and MF also highlight candidate genes as potential mediators of the  
207 pro-thrombotic and pro-fibrotic phenotypes in MPNs. In ET and PV, a strong thromboinflammatory profile  
208 (Barbui and Falanga, 2016; Gangaraju et al., 2020) is revealed by the upregulation of several interferon  
209 inducible transmembrane genes (*IFITM2*, *IFITM3*, *IFITM10*, *IFIT3*, *IFI6*, *IFI27L1*, *IFI27L2*), interleukin  
210 receptor accessory kinases/proteins (*IRAK1*, *IL15*, *IL1RAP*, *IL17RC*) and several solute carrier family genes  
211 (*SLC16A1*, *SLC25A1*, *SLC26A8*, *SLC2A9*) as glucose and other metabolic transport proteins, and  
212 coagulation factor V (*F5*). In MF, fibrosis-specific markers were identified by an additional focused  
213 comparison of MF patients versus ET and PV (**Figure S2**), showing increased expression of several pro-  
214 fibrotic growth factors (*FGFR1*, *FGFR3*, *FGFRL1*), matrix metalloproteinases (*MMP8*, *MMP14*), vascular  
215 endothelial growth factor A (*VEGFA*), insulin growth factor binding protein (*IGFBP7*), and cell cycle  
216 regulators (*CCND1*, *CCNA2*, *CCNB2*, *CCNF*). GSEA of this MF-focused comparison again highlighted  
217 potential underlying molecular dysregulation in MPNs that likely contribute to the fibrotic phenotype (e.g.  
218 unfolded protein response, mTORc1 signaling, MYC/E2F targets, oxidative phosphorylation, **Figure 4**).

219 Having defined differential gene expression signatures by MPN subtype, we then explored how platelet  
220 gene expression profiles differed in patients by treatment, focusing for this work on the JAK1/JAK2  
221 inhibitor, ruxolitinib (RUX, **Figure 2E**). DGEA on the platelet transcriptome in RUX-treated patients  
222 identified over 400 core significant genes changed in response to treatment (**Figure 2E and**  
223 **Supplementary Tables S4 and S5**). At-least two-fold reduction in expression was noted in genes  
224 associated with interferon-stimulation (*IFI6*, *TRIM69*, *LY6G5C*), platelet-mediated apoptosis, *FASLG*, G-  
225 protein coupled receptor, *GPR88*, calcium-calmodulin protein kinase, *CAMK2A* and fibroblast growth  
226 factor binding protein, *FGFBP2*, followed by over 150 genes with at-least one-fold reduction in expression  
227 in the RUX-treated cohort (**Supplementary Table S5**). These included genes downregulated within  
228 classical pathways of adaptive immune response (*TNFSF13B*, *B2M*, *HMGB1*), response to oxidative stress  
229 (*COX1*, *COX2*, *COX15*, *TP53*) and myeloid activation (*TNIP2*, *FTH1*, *TOLLIP*, *RAB6A*).

230 In addition to confirming previous observations (Arcaini and Cazzola, 2018; Kleppe et al., 2018; Spivak,  
231 2017; Vainchenker et al., 2018) on the anti-inflammatory and immunosuppressive effects of JAK inhibition  
232 by RUX (e.g. downregulation in our RUX-treated cohort of *IL1RAP*, *CXCR5*, *CPNE3*, *ILF3*), we identified  
233 new gene clusters responsive to RUX in the inhibition of type I interferon (e.g. *IFIT1*, *IFIT2*, *IFI6*), chromatin  
234 regulation (*HIST2H3A/C*, *HIST1H2BK*, *H2AFY*, *SMARCA4*, *SMARCC2*), and epigenetic methylation in  
235 mitochondrial genes (*ATP6*, *ATP8*, *ND1-6* and *NDUFA5*). Recent literature probing the mechanisms of  
236 action of ruxolitinib in other disease settings, including SARS-CoV-2 (Yan et al., 2021; Zhou et al., 2014)  
237 confirm our observations in MPNs.

238 A direct comparison restricted to only differentially expressed genes (FDR<0.05) in *RUX-treated vs not* with  
239 *MF vs healthy controls* revealed less than 5% overlap (**Figure 2D**), reflecting potentially the extent of the  
240 impact of treatment by ruxolitinib relative to the substantive disease burden in MF. Focusing further on the  
241 directionality of the changes observed, we found just 18 genes that were increased in MF and suppressed  
242 in the RUX-treated cohort (**Figure 2E**, colored green); and 9 vice versa (**Table S3A-B**). Despite the small  
243 overlap, we capitalized on the converging genes to better define molecular and physiological pathways  
244 underlying the effect of RUX in MPNs. The 18 RUX-down-regulated genes followed expected mapping to



245 immunosuppression through interferon- and cytokine-mediated signaling pathways. The 9 genes that were  
246 upregulated with RUX in MF mapped to previously undescribed effect of the drug in select G-protein-  
247 coupled receptor and chemokine activity (e.g. *CXCR5*, *GPR128/ADGRG7*), semaphorin signaling  
248 (*SEMA3C*) and circadian regulation (*PER3*). A sub-cohort analysis of RUX-treated and RUX-naïve MF  
249 patients alone also identified downregulation of interferon-stimulated genes (e.g. *SLFN12L*), G-protein-  
250 coupled receptors (*S1PR5*), fibroblast growth factor binding protein (*FGFBP2*) and tyrosine kinase (*LCK*).

### 251 **Graded differential expression by MPN phenotype and driver mutation status**

252 Unsupervised hierarchical clustering was used to more precisely define the nature of MPN platelet  
253 transcriptome variability from controls, as well as between and within MPN subtypes. **Figure 3** reveals a  
254 spectrum of expression in the MPN platelet transcriptomic profile using just the top 10 highly significant  
255 differentially expressed genes by disease status: (a) all MPN vs controls, (b) MF vs controls, and (c, and d)  
256 ET- and PV- vs controls. As shown in **Figure 3A**, all MPN patients clustered into two distinct groups: a  
257 larger group of 87 ET, PV and MF patients clustered independently from the 21 controls, whereas a smaller  
258 group of 10 ET, PV and MF patients formed a homogeneous cluster of their own closer to controls  
259 reflecting a varying gradation with respect to the top-10 gene expression by MPN subtype (patient  
260 variables annotated above the heatmaps offer additional context, particularly on mutation status and RUX  
261 therapy). In the larger cluster, while we observed a graded overlap in platelet RNA signatures between ET  
262 and PV, a more distinct expression pattern characterized the more advanced population of MF patients  
263 (*PC1 correlates with MF disease risk by the Dynamic International Prognostic Scoring System (Passamonti*  
264 *et al., 2010), DIPSS, Figure S3*). These data collectively highlight the importance of phenotype-modifying  
265 genes that are independent of *JAK2/CALR/MPL* mutation status.

266  
267 Untangling other mechanisms beyond the few genes that are recurrently mutated is critical for defining  
268 subtype-specific risk and for identifying molecular pathways for targeted therapy. Accordingly, we sought  
269 to refine the molecular classification of MPN by associating platelet gene expression profiles with the  
270 corresponding subtype, and yielded a core set of 10 highly-significant preferentially expressed genes for  
271 each: (i) MF (**Figure 3B**), defined by high mRNA expression of proteostasis-associated *CREB3L1* and

272 *CALR*, and megakaryocyte-erythroid differentiation stage-associated *RHAG* (Caparros-Perez et al., 2017;  
273 Zeddies et al., 2014) ii) ET (**Figure 3C**), marked by comparatively high expression of interferon-related  
274 genes *IFITM2/3*, immune response *FCGR2A*, and proliferation-associated *STAT5* target *OSBP2*; and iii) PV  
275 (**Figure 3D**), marked by overlapping signatures with ET in inflammation-associated *IFITM3* and *TBL1X*, and  
276 the B-myb promoter, *MYBL2*; with MF in the maturation-associated *RHAG* at variable expression; and with  
277 both ET and MF in the high expression of *CREB3L1*, and cell survival-associated *MINDY4* and *STAC*.

278

### 279 **Altered immune, metabolic, and proteostatic pathways underlie each MPN phenotype**

280 Our analysis of MPN platelet RNA-seq enabled identification of altered MPN pathways that might be  
281 amenable to drug therapy. To understand the biological significance of transcriptional changes, we  
282 performed pathway-enrichment analysis and identified signaling pathways that are differentially activated  
283 between MPN subtypes (**Figure 4**). Gene set enrichment analysis (GSEA, see Methods) of Hallmark gene  
284 sets found that MPN (stratified by subtypes, ET, PV and MF) induces genes related to pathways with  
285 known immune modulatory functions (**Figure 4**, notably interferon alpha response in ET, PV and MF, and  
286 IL2 STAT5 signaling, and interferon gamma response specifically enriched in PV). Moreover, among the  
287 most enriched gene sets, MPN pathology induces robust activation of oxidative phosphorylation  
288 (OXPHOS) and mTORC1 signaling pathways, with increasing enrichment and significance by MPN subtype  
289 (FDR <0.0001 in MF). Pathways of reactive oxygen species (ROS) production paralleled activation of  
290 mTORC1 in MF. Other complementary metabolic pathways paralleled OXPHOS activation, with significant  
291 enrichment of bile and fatty acid metabolism, cholesterol homeostasis and adipogenesis, most  
292 pronounced in MF and variably expressed in ET and PV. Coagulation- and complement-associated gene  
293 sets were expectedly enriched across ET, PV and MF. What is particularly noteworthy is that in MF, cell  
294 cycle progression and proliferation pathways reveal significant enrichment (FDR <0.001) around c-MYC  
295 and E2F targets, and G2M checkpoint pathways; and unfolded protein response emerges as a key factor,  
296 likely attributable to ER stress (see *CREB3L1*, *CALR* overexpression in **Figures 2,3**). Representative GSEA  
297 profiles are shown in **Figure 4** and the full list of enriched pathways and gene sets detailed in **Table S4A-**  
298 **C**. The MPN pathways exhibiting significant transcriptional regulation by GSEA are consistent with our  
299 observations at the individual gene level for upregulated and downregulated transcripts, specifically those

300 upregulated in MF. Taken together, these data demonstrate that in addition to immune factors such as  
301 type I/II interferons and dysregulation of interleukin-dependent inflammatory responses, which have been  
302 linked to MPNs, platelet transcriptional signatures of proliferation, metabolic, and proteostasis signaling  
303 are a feature of MPN pathogenesis (**Figure S4** captures the relative enrichment by subtype of MPN  
304 molecular pathway categories as a concept model of MPN progression).

305

### 306 **Prediction of MF based on shared, unique and progressive MPN platelet transcriptome**

307 Current knowledge of MPN genetic, cytogenetic or epigenetic abnormalities are limited (Spivak, 2017;  
308 Spivak et al., 2014) in their ability to enable prediction of disease progression or evolution of a given  
309 patient, from ET/PV phenotype to MF. In order to investigate the potential of platelet transcriptomic  
310 parameters to enable MF prediction, we constructed LASSO penalized (Tibshirani, 1996) regression  
311 classifiers (machine learning R package *glmnet*) to discriminate MPN subtypes from each other, and from  
312 healthy controls (**Figure 5A-E**). We apply two rigorous (Moons et al., 2012) external validation conditions  
313 (**Figure 5C,D**): i) training and independent temporal validation (**Figure 5C**) leveraging the Stanford two-  
314 cohort design and ii) geographical validation (**Figure 5D**) using two independently published platelet  
315 transcriptome datasets: first, from Rondina et al., 2020 on an additional n=31 healthy donors integrated  
316 with the Stanford datasets as training; and second, from Guo et al., 2020 n=25 MF and n=15 healthy  
317 donors as geographical validation of the Lasso algorithm (**Figure 5D**). Our temporal validation constituted  
318 three types of models i) baseline (no transcriptome, but age, gender and driver mutation status as  
319 reference variable information available not only for patients but also healthy donors); ii) full platelet  
320 transcriptome integrated with the above baseline; and iii) subset platelet transcriptome that exhibits  
321 progressive differentiation from controls to ET to MF or controls to PV to MF (>3000 genes, top few of  
322 each comparison visualized to demonstrate progressive gene expression, **Figure 5A-B**) integrated with the  
323 above baseline (progressive subset is selected unbiased as part of the Lasso learning procedure).  
324 Comparison of the classification potential among the three models demonstrated that the progressive  
325 platelet transcriptome model (**Figure 5E** red curve) substantially outperformed the baseline model (**Figure**  
326 **5E** black curve) and was slightly better than the full transcriptome model (**Figure 5E** blue vs red curves) in

327 the classification of ET, PV and MF. Predicted probabilities for all three models are shown in **Table S5A-C**.

328 Lasso logistic regression classifiers to predict MF with each of the models under the first temporal two-  
329 cohort training-validation split of baseline, full, and progressive transcriptome each achieved area under  
330 the receiver-operating characteristic curve (AUROC) of 0.68, 0.95, and 0.96 respectively. Outperformance  
331 of the progressive transcriptome model was validated in our subsequent independent external geographic  
332 validation (**Figure 5E** green curve) at an AUROC of 0.97. Recurrent top 4 genes from our progressive  
333 transcriptome Lasso are visualized as a heatmap in **Figure 5F** clearly capturing the incremental gradient in  
334 gene expression between controls, ET, PV and MF. These include *ADAMTS3* (ADAM metalloproteinase  
335 protease (Mead and Apte, 2018) with likely roles in *VEGF* signaling, tissue remodeling and expression of  
336 related collagens through profibrotic *PAR1* and *TGF- $\beta$*  signaling), *PSMB5* (implicated in proteasomal  
337 degradation/UPR activation (Wang et al., 2017) and identified previously in MPNs (Skov et al., 2010)), *NT5C*  
338 related to *PI3K* signaling (Fruman et al., 2017; Moniz et al., 2017) and *SUPT6H/SPT6* (Bres et al., 2008;  
339 *Frydman et al., 2020*), a tumor-initiating histone chaperone associated with chromatin remodeling. Lasso-  
340 selected candidate markers capture the underlying MPN pathology and offer potential therapeutic targets.

341  
342 A key aspect of the layered Lasso modeling demonstrated here is our use of an approach that can be  
343 developed in future work to incorporate additional predictors to MF (e.g. *JAK2* V617F allele burden  
344 (Vannucchi et al., 2008) or other genetic variants (Tefferi et al., 2016) beyond the driver mutations). **Figure**  
345 **S5** demonstrates this through a second base model for prediction to MF from ET or PV alone (no  
346 transcriptome, but platelet count and hemoglobin levels as two additional clinical parameters that were  
347 available for all patients in addition to age, gender and driver mutation status).

348

## 349 **Discussion**

350 Here, we present a comprehensive catalog of the platelet transcriptome in chronic progressive MPN with  
351 immediate relevance to defining subtype-specific molecular differences and predicting the advanced  
352 phenotype, myelofibrosis. Recent data (Williams et al., 2020) identify the timing of MPN driver mutation  
353 acquisition to be very early in life, even before birth, with life-long clonal expansion and evolution. These

354 new findings highlight the importance of early progression biomarkers and the substantial opportunity for  
355 early detection and intervention strategies in these disorders.

356 Our analyses confirm and extend many important observations made previously either in vitro (LaFave and  
357 Levine, 2016; Merlinsky et al., 2019; Osorio et al., 2016), in other transcriptome or microarray analyses  
358 (Gangaraju et al., 2020; Guo et al., 2019; Rampal et al., 2014; Rontauroli et al., 2021; Skov et al., 2012;  
359 Wong et al., 2019) including our own early work (Krishnan et al., 2017), or using animal models (Dunbar et  
360 al., 2017; Matsuura et al., 2020; Mullally et al., 2013; Wen et al., 2015). By highlighting intersecting  
361 mechanisms in transcription across MPN, and by annotating MPN subtype-specific gene signatures, this  
362 dataset facilitates predictive machine learning algorithms, that aid in MPN classification and potential  
363 prognostication.

364 The platelet transcriptome is significantly reprogrammed in the MPN setting, with a wealth of transcript  
365 associations that may be missed in using conventional tissue sources such as serum, plasma, whole blood  
366 or bulk bone marrow. While previous bulk RNA-seq studies on MPNs by us and others analyzed far fewer  
367 samples (Guo et al., 2019; Krishnan et al., 2017; Skov et al., 2011; Skov et al., 2012), select MPN subtypes  
368 (Gangaraju et al., 2020; Guo et al., 2019), or non-specific source tissue (Schischlik et al., 2019; Skov et al.,  
369 2011; Skov et al., 2012) that may be underpowered (Cummings et al., 2017) for candidate genes, we here  
370 analyzed, by next generation RNA sequencing, 120 purified platelet samples from healthy controls and all  
371 three subtypes; and identified clinically interpretable transcriptomic signatures for each of the three  
372 subtypes. Each subtype showed both overlapping and progressively divergent transcriptional pathways,  
373 suggesting both a shared signature across all MPN, and unique biological trajectories. Pathway-  
374 enrichment analyses confirmed the existence of a shared inflammatory milieu (Barbui et al., 2011; Geyer et  
375 al., 2015; Hasselbalch and Bjorn, 2015; Koschmieder and Chatain, 2020; Marin Oyarzún and Heller, 2019;  
376 Mughal et al., 2019; Skov et al., 2011) among MPN. We also confirmed that the JAK1/JAK2 inhibitor  
377 ruxolitinib was associated with inhibition of inflammatory as well as interferon-mediated signaling  
378 pathways. Additional previously undescribed insights into the mechanisms of action of RUX in MF included  
379 genes implicated in protein maturation, chaperone-mediated protein complex assembly, and circadian

380 rhythm. These and other gene signatures and pathways identified may help guide candidate drugs to be  
381 used alone or in combination with RUX for the treatment of MPNs. Whether MPN oncogenic driver  
382 mutations increase inflammation or mutations are acquired in response to inflammatory stimuli is unclear  
383 from this work and remains an active area of investigation (Curto-Garcia et al., 2020; Hasselbalch and  
384 Bjorn, 2015; Koschmieder and Chatain, 2020; Lussana et al., 2017).

385 The 10 genes most significant (FDR < 0.001) of the commonly expressed genes across MPN indicated a  
386 gradation in platelet gene expression, with overlapping signatures in ET and PV (e.g. *IFITM2*, *MYBL2*) and  
387 a substantial difference with MF (e.g. *CREB3L1*, *CALR*) that was independent of driver mutation status or  
388 treatment. Hence, while over 1500 genes were commonly differentially expressed across MPN, their  
389 abundance and function could differ between subtypes. The nature of the separation of transcriptomic  
390 clusters between ET, PV and MF suggest also that they represent diverse cell states along a continuous  
391 spectrum of MPN, in line with the clinical overlap of these neoplasms.

392  
393 Another observation relates to the association of the differential genes with signaling pathways: as  
394 indicated above, all three MPN subtypes showed a positive enrichment in immune modulation pathways,  
395 independent of mutational status. Whether this response reflects a causal effect of inflammation on bone  
396 marrow biology remains to be elucidated. Indeed, the platelet transcriptomic signatures could also reflect  
397 inter-cell interactions of platelets with other immune cells, including as transient aggregates with  
398 neutrophils, granulocytes and dendritic cells. Nevertheless, observations that MPN transcriptomic  
399 biomarkers correlated robustly with immune factors such as type I/II interferons and dysregulation of  
400 interleukin-dependent inflammatory responses across ET, PV and MF suggest opportunities for use of  
401 these and other subtype-specific genes as biomarkers for prognosis as well as design of therapies and  
402 prediction of response.

403  
404 Our data closely overlaps with recent MPN platelet studies: thrombo-inflammatory signatures in PV from  
405 Gangaraju and Prchal et al (Gangaraju et al., 2020) (*BCL2*, *CXCL1*, *MMP7*, *PGLYRP1*, *CKB*, *BSG*, *CFL1*  
406 and more) or fibrosis-associated signatures in MF from Guo et al. (*CCND1*, *H2AFX*, *CEP55* and several  
others collectively reflected in the external validation of our Lasso algorithm).

407 Most notably in our data on MF, high expression of ER stress and unfolded protein response (UPR)  
408 biomarkers (e.g. *CREB3L1*, *CALR*) associated with impaired proteostasis signaling; and emerged as a key  
409 feature of MPN pathobiology. Indeed, recently published work from distinct research groups (Liu et al.,  
410 2020; Osorio et al., 2016)(LaFave and Levine, 2016) highlight protein quality control in ER-associated  
411 degradation and proteostasis (Osorio et al., 2016)(LaFave and Levine, 2016) deregulation as a primary  
412 effector of myeloid transformation highlighting the importance of protein homeostasis for normal  
413 hematopoiesis. These findings too are in line with reports (Kaushik and Cuervo, 2015) implicating chronic  
414 ER stress, malfunctioning protein quality control, and loss of proteostasis as aggravating factors in age-  
415 related disorders.

416  
417 Most importantly, platelet gene expression profiling in MPN offers directions for prediction of  
418 myelofibrosis. Applying machine-learning algorithms of LASSO penalized regression under two conditions  
419 of external validation (Moons et al., 2012): temporal (using our two cohort design) and geographical  
420 (independently published datasets on healthy donors(Guo et al., 2020; Rondina et al., 2020) and MF (Guo  
421 et al., 2020), we uniquely discriminate MPN subtypes from each other, and healthy controls using three  
422 model types and predict MF at high accuracy. The highest performing model used a set of progressively  
423 differentiated MPN genes at an area under the (ROC) curve of 0.96 (temporal) and 0.97 (geographical); and  
424 rendered a core signature of <5 candidate markers as top predictors of disease progression. It will be of  
425 interest to determine what machine-learning algorithms based on a defined platelet gene expression  
426 classifier on potential new MPN datasets (ideally longitudinal) can be used to more precisely predict the  
427 probability and/or timing of an individual's risk of progression from ET/PV to secondary MF.

428  
429 In conclusion, using platelet transcriptome profiling, we observed dynamic shifts in MPN immune  
430 inflammatory profile and preferential expression of interferon-, proliferation-, and proteostasis-associated  
431 genes as a progressive gradient across the three MPN subtypes. Our findings highlight that MPN  
432 progression may be influenced by defects in protein homeostasis (impaired protein folding and an  
433 accumulation of misfolded proteins within the endoplasmic reticulum) and an abnormal integrated stress  
434 response – consistent with recent studies<sup>57</sup>(Liu et al., 2020; Osorio et al., 2016)(LaFave and Levine, 2016)

435 indicating dysregulated proteostasis as a primary effector of myeloid transformation. While this particular  
436 work has been focused on the overarching progressive platelet transcriptome across MPNs, these data  
437 open an important avenue for utilizing platelet RNA signatures to better understand specific MPN  
438 complications such as the risk of thrombosis and bleeding, or fibrosis and transformation to AML.  
439 Altogether, this study demonstrated in chronic MPNs provides a comprehensive framework for exploiting  
440 the platelet transcriptome and may inform future studies toward mechanistic understanding and  
441 therapeutic development in MPNs, and potentially other age-related disorders.

442

### 443 **Limitations of the study**

444 There are several limitations to our study. First, our data are not longitudinal by design but rather the  
445 closest practical alternative of cross-sectional snapshots of all three MPN subtypes with the goal of  
446 achieving a well-powered dataset in these chronic disorders. In this regard, the progressive or progression  
447 terminology used here refer strictly to trends in gene expression and do not imply study of longitudinal  
448 clinical progression. Therefore, subsidiary longitudinal evaluation of the disease as well as treatment  
449 markers identified here is warranted. Second, our focus for this study has been on the platelet  
450 transcriptome alone. Future investigations focused on ascertaining overlap between our platelet-derived  
451 molecular alterations with those of other cell types, specifically, parent megakaryocytes, CD34+ cells,  
452 granulocytes/immune cells and even whole blood will be required to identify additional functional aspects  
453 of bone marrow pathology. Such integrative analyses may also necessitate advanced systems genomics  
454 methods that compare or combine data without biases and batch effects inherent in each cell data type.  
455 Third, we recognize that our choice of ribosomal RNA depletion to home in on platelet mRNA signatures  
456 leaves out additional diversity in the platelet RNA repertoire (and will be important future work). Lastly, in  
457 our Lasso predictive modeling, we demonstrate two rigorous approaches of external validation (temporal  
458 and geographical) and identify a core signature toward MPN risk stratification or early detection of  
459 progression. Yet, substantive future biological and computational validations are needed in order to  
460 advance our findings toward clinical decision making or personalized medicine.

461

462



## 463 **Methods**

### 464 Ethical Approval

465 All MPN peripheral blood samples were obtained under written informed patient consent and were fully  
466 anonymized. Study approval was provided by the Stanford University Institutional Review Board.  
467 All relevant ethical regulations were followed.

### 468 Subjects and Specimen Collection

469 We collected blood from ninety-five MPN patients enrolled in the Stanford University and Stanford Cancer  
470 Institute Hematology Tissue Bank from December 2016- December 2019 after written informed consent  
471 from patients or their legally authorized representatives (Stanford IRB approval #18329). Eligibility criteria  
472 included age  $\geq 18$  years and Stanford MPN clinic diagnosis of essential thrombocythemia, polycythemia  
473 vera or myelofibrosis (defined using the consensus criteria at the time of this study). We use the term  
474 'myelofibrosis' to encompass both primary myelofibrosis and myelofibrosis that evolved from essential  
475 thrombocythemia or polycythemia vera. Electronic medical records review of all subjects was performed  
476 by the clinical consultants (J.G. and L.F.), study data manager (C.P.), and the study principal investigator  
477 (A.K.). For controls, blood was collected from twenty-one asymptomatic adult donors selected at random  
478 from the Stanford Blood Center. All donors were asked for consent for genetic research. For both MPN  
479 patients and healthy controls, blood was collected into acid citrate-dextrose (ACD, 3.2%) sterile yellow-top  
480 tubes (Becton, Dickinson and Co.) and platelets were isolated by established (Amisten, 2012; Campbell et  
481 al., 2018; Middleton et al., 2019; Rowley et al., 2011) purification protocols. Blood was processed within 4h  
482 of collection for all samples. The time from whole blood collection to platelet isolation was similar between  
483 healthy donors and MPN patients.

### 484 485 Platelet Isolation

486 Human platelets were isolated and leuko-depleted using established methods ((Amisten, 2012; Campbell  
487 et al., 2018; Rowley et al., 2011) with excellent reproducibility (Campbell et al., 2018; Davizon-Castillo et al.,  
488 2020; Manne et al., 2020; Middleton et al., 2019; Rondina et al., 2013) resulting in a highly purified  
489 population of fewer than 3 leukocytes/ $10^7$  platelets (>99.9% purity) as counted by hemocytometer. Briefly,  
490 the ACD-tube whole blood was first centrifuged at 200xg for 20min at room temperature (RT). The platelet-  
491 rich plasma (PRP) was removed and Prostaglandin E1 was added to the PRP to prevent exogenous  
492 platelet activation. The PRP was then centrifuged at 1000xg for 20min at RT. The platelet pellet was re-  
493 suspended in warmed (37 deg C) PIPES saline glucose (PSG). Leukocytes were depleted using CD45+  
494 magnetic beads (Miltenyi Biotec). Isolated platelets were lysed in Trizol for RNA extraction. Post RNA-seq  
495 analysis of an index leukocyte transcript (*PTPRC*; *CD45*) confirmed that the samples were highly purified  
496 platelet preparations (subsequent bioinformatic analyses also adjusted for *PTPRC* expression for absolute  
497 removal of any CD45 expression in our analyses). Two reference markers of platelet activation, *P-selectin*

498 (*SELP*) and *Glycoprotein IIb/IIIa (CD41/ITGA2B)* were expectedly higher in all MPN than healthy controls  
499 but were not statistically significantly different between MPN subtypes; indicating that any expression  
500 difference was not due to experimental artefacts. In addition, we know from prior work (J.R.) that  
501 regardless of activation status, RNA-seq reliably estimates mRNA expression patterns in platelets. We also  
502 know from rigorous prior work (Gnatenko et al., 2003; Raghavachari et al., 2007; Weyrich and Zimmerman,  
503 2003) that several abundant platelet mRNAs are well-known leukocyte or red cell transcripts; and do not  
504 immediately imply contamination by these classes but rather that platelets express gene products that are  
505 also present in other cell lineages. Sixty-five of our top 100 abundant platelet transcripts matched exactly  
506 with those of the top 100 abundant genes from the three previous studies cited (Gnatenko et al., 2003;  
507 Rowley et al., 2011); and a composite pathway analysis with the top 100 abundant genes from this as well  
508 as the previous studies matched identically.

509

#### 510 Next Generation RNA Sequencing

511 For next generation RNA-sequencing (RNA-seq),  $1 \times 10^9$  isolated platelets were lysed in Trizol and then  
512 DNase treated. Total RNA was isolated, and an Agilent bio-analyzer was used to quantify the amount and  
513 quality. The RNA yield was estimated by measuring absorbance at 260 nm on the Nanodrop 2000 (Thermo  
514 Fisher), and RNA purity was determined by calculating 260/280 nm and 260/230 nm absorbance ratios.  
515 RNA integrity was assessed on the Agilent Bioanalyzer using the RNA 6000 Nano Chip kit (Agilent  
516 Technologies). An RNA integrity number (RIN) was assigned to each sample by the accompanying  
517 Bioanalyzer Expert 2100 software. To control for variable RNA quality, RNA sequencing was only  
518 performed for samples with a RIN score of 7 or higher. RNA-seq libraries were constructed with removal of  
519 ribosomal RNA using the KAPA Stranded RNA-Seq kit with RiboErase (Roche). The RNA extraction and  
520 library preparation were performed by the same technician to minimize confounding effects. cDNA libraries  
521 were constructed following the Illumina TrueSeq Stranded mRNA Sample Prep Kit protocol and dual  
522 indexed. The average size and quality of each cDNA library were determined by the Agilent Bioanalyzer  
523 2100, and concentrations were determined by Qubit for proper dilutions and balancing across samples.  
524 Twelve pooled samples with individual indices were run on an Illumina HiSeq 4000 (Patterned flow cell with  
525 HiSeq4000 SBS v3 chemistry) as 2 X 75bp paired end sequencing with a coverage goal of 40M  
526 reads/sample. Output BCL files were FASTQ-converted and demultiplexed.

527

#### 528 Platelet Transcriptome Analysis

529 Picard, Samtools, and other metrics were used to evaluate data quality. Processed reads were aligned  
530 against the reference human transcriptome GRCh37/hg19 using RSEM (Li and Dewey, 2011) and  
531 bowtie2 (Langmead and Salzberg, 2012), and expression at gene level determined by calculating raw gene  
532 count. Only genes that passed expression threshold were used; genes were considered expressed if, in all  
533 samples, they had at least 10 counts (genes with low counts are automatically filtered by built-in functions  
534 in DeSeq2, see below). A total of 12,924 genes were considered expressed. Gene expression data was

535 library-size-corrected, variance-stabilized, and log<sub>2</sub>-transformed using the R package DESeq2(Love et al.,  
536 2014). We refer to this version of the data as “raw data” as it is not corrected for any confounders of gene  
537 expression variability. DESeq2 was used to call differential expression while adjusting for patient age,  
538 gender and treatment as confounding variables and controlling for multiple comparisons using the  
539 Benjamini-Hochberg defined false discovery rate (FDR). Significant variance in expressed transcripts were  
540 pre-specified as those transcripts with an FDR <0.05 and a log<sub>2</sub> fold change ≥ 0.5 in MPN, as compared  
541 to healthy controls (the entire differential transcriptome was applied in the instances of downstream Gene  
542 Set Enrichment Analysis and the Lasso prediction modeling).

543

#### 544 Statistical analysis

545 Continuous data were summarized as medians and IQRs and categorical data are presented as  
546 frequencies and percentages. To compare differences in clinical variables between healthy controls and  
547 MPN subtypes (ET, PV and MF), we use box and whisker plots and conduct pairwise Wilcoxon signed  
548 ranked tests. For unsupervised clustering and visualization, we performed principal component analyses  
549 (identifying MPN subtypes by color, treatment by filled or open circles, and *JAK2* mutation status by  
550 shape) using built-in functions of the DeSeq2 R package. We generated a heatmap of all of the top highly  
551 significant genes (FDR < 0.01) using the pheatmap R package and its built-in functions for hierarchical  
552 cluster analysis on the sample-to-sample Euclidean distance matrix of the expression data. All analyses  
553 were performed using the R studio interface.

554

#### 555 Pathway/Gene set enrichment analysis for differentially expressed (DE) genes.

556 Gene set enrichment analysis (GSEA)(Subramanian et al., 2005) was performed on the entire DE gene set  
557 for each MPN subtype, using the Cancer Hallmarks gene sets from MSigDB(Liberzon et al., 2015). The  
558 ‘GSEA Pre-ranked’ function was used with a metric score that combines fold change and adjusted p-value  
559 together for improved gene ranking. We used default settings with 10,000 gene set permutations to  
560 generate *p* and *q* values, and compared MPN subtypes in the overall cohort, and the ruxolitinib-treated  
561 subgroup and the ruxolitinib-naive subgroup separately. In these analyses, to allow for a broad  
562 comparison, we assessed all transcripts that were differentially expressed according to FDR/adjusted *p* <  
563 0.25 as recommended by the authors of GSEA (Subramanian et al., 2005).

564

#### 565 Predictive model generation and external validation

566 At the conception of this study late 2016, and our early work(Krishnan et al., 2017), we did not identify any  
567 publicly available RNA sequencing data on MPN platelets. This prompted our specific two-cohort design  
568 for the express purpose of temporal external validation as an essential step in rigorous prediction  
569 modeling(Moons et al., 2012). A subsequent independent publication(Guo et al., 2020) facilitated an  
570 additional geographically independent external validation of our model.

571 We used Lasso penalized regression (Tibshirani, 1996) for our model to predict MF from the either healthy  
572 controls, ET or PV. Among a variety of statistical machine learning algorithms that have been used in  
573 prediction modeling, Lasso is favored for its flexibility and simplicity; and its ability to identify the least set  
574 of significant factors from high dimensional data. We evaluated platelet transcriptomic features with clinical  
575 features (age, gender and mutation status for the entire dataset including healthy donors, and in MPN  
576 patients alone, platelet and hemoglobin values). Normalized gene counts data were split into training  
577 (used for constructing multinomial logistic models) and validation (used for model evaluation and  
578 generalization) cohorts. Separately, we assessed the progressive and monotonic upward or downward  
579 trend in gene expression, we applied the Mann-Kendall trend test (multiple comparison adjusted with the  
580 Benjamini-Hochberg method) to normalized gene counts and identified statistically significant progressive  
581 genes across all three MPN subtypes.

582

583 Three multinomial logistic models were constructed: first, with Lasso selected predictors from all genes,  
584 second, with Lasso selected predictors from progressive genes and third, a baseline model using age,  
585 gender and mutation status (*JAK2* and *CALR*) as predictors. Model outputs correspond to probabilities of  
586 having a CTRL, ET, PV or MF phenotype (sum of these four probability values totaling 1). Potential  
587 interpretation of these probabilities includes MPN risk assessment, e.g. a patient with higher probabilities  
588 of PV and MF would indicate higher risk than one with higher probabilities of CTRL or ET. The (Guo et al.,  
589 2020) dataset on MF platelet RNA seq served as an independent test set (Fig. 5D schematic) while data  
590 from our cohorts at Stanford and additional external data on healthy donors from (Rondina et al., 2020)  
591 constituted an integrated training cohort (R package Limma was applied for bioinformatic correction of any  
592 batch effects).

593

594 ROC curves were used to evaluate the different prediction models and discriminate outcomes. ROC  
595 curves demonstrate the trade-off between true positive and false positive rates, ideal being high true  
596 positive rate (sensitivity) and low false positive rate (specificity) the area under the curve (AUROC) as close  
597 to 1 as possible. True positive rate (TPR) is defined as correctly predicting an MF patient as MF; and false  
598 positive rate (FPR) as falsely predicting a non-MF patient as MF.

599

600

601

602

603

604

605 **Authorship Contributions** A. Krishnan, J. Gotlib and J. Zehnder conceived of the overall study.

606 A. Krishnan designed the study and secured funding that initiated this research. L.F., C.P., and J.G.  
607 provided samples and clinical annotation and reviewed the clinical data. A.K. designed the experimental  
608 plan with input from J.R., H.M., J.G. and J.Z. A.K. coordinated, performed and oversaw the sample  
609 acquisition and processing. V.N. performed RNA isolation and library preparation. A.K. coordinated and  
610 oversaw sample sequencing. Z.S., W.D. and A.K. performed and interpreted the computational analyses.  
611 A.K. J.R., H.M., J.G. and J.Z. interpreted the data. A.K. wrote and edited the manuscript; C.P., W.D., J.R.,  
612 H.M., J.G. and J.Z. critically reviewed and edited the manuscript. †J.G. and J.Z. contributed equally.  
613 All authors approved the final manuscript.

614

615 **Acknowledgements** This work was funded by US National Institutes of Health grants 1K08HG010061-  
616 01A1 and 3UL1TR001085-04S1 (research re-entry award) to A.K and the Charles and Ann Johnson  
617 Foundation to J.G. A.K. would like to thank mentors, Profs. Richard Becker (University of Cincinnati, OH),  
618 Andrew Weyrich (University of Utah, UT), Harry Greenberg (Stanford University, CA), Rob Tibshirani  
619 (Stanford University, CA) and Stephen Montgomery (Stanford University, CA) for their support in her unique  
620 return to research and NIH funding after a 5-year hiatus that then led to the work outlined in this  
621 manuscript. All authors thank the patients at the Stanford Cancer Center for their generous participation in  
622 this research, and the Stanford Functional Genomics Facility for genomic data storage. Authors also thank  
623 Drs. Belinda Guo and Wendy Erber (University of Western Australia, Australia) for the gene counts file of  
624 their published data (PMID 31426129) used for our independent validation. A.K. extends special thanks to  
625 colleagues Dr. Kellie Machlus (Harvard University, MA), and Dr. Eric Pietras (University of Colorado, CO) for  
626 their critical reading of the manuscript.

627

628

629

630

631

632 **Data Sharing Statement**

633 RNA-sequencing data from this work (original FASQ files from paired-end sequencing of all 120 samples)  
634 will be deposited to the NIH genomic data repository dbGAP under public accession # PHS-0021-21.  
635 v1.P1. Previously published RNA-sequencing data used in this work as geographically independent  
636 validation cohorts are from Rondina et al (PMID 31852401, healthy donors) and Guo et al (PMID 31426129,  
637 MF patients and healthy donors). Source data from the work of Rondina et al is publicly available at NIH  
638 NCBI Bioproject ID 531691; and that of Guo et al is secured through reaching the corresponding author,  
639 Dr. Wendy Erber.

640

641 A private link for editors and reviewers will be made available at a Stanford web-based data repository.

642 **Ethics Declarations/Competing Interests** The authors declare no competing interests.

643

644

645

646

647

648

649

650

651

652

653

654

655

656

657

658

## Bibliography

659

660

- 661 Amisten, S. (2012). A rapid and efficient platelet purification protocol for platelet gene expression studies.  
662 *Methods in molecular biology* (Clifton, NJ) 788, 155-172.
- 663 Arcaini, L., and Cazzola, M. (2018). Benefits and risks of JAK inhibition. *Blood* 132, 675-676.
- 664 Barbui, T., Carobbio, A., Finazzi, G., Vannucchi, A. M., Barosi, G., Antonioli, E., Guglielmelli, P., Pancrazzi,  
665 A., Salmoiraghi, S., Zilio, P., Ottomano, C., *et al.* (2011). Inflammation and thrombosis in essential  
666 thrombocythemia and polycythemia vera: different role of C-reactive protein and pentraxin 3.  
667 *Haematologica* 96, 315-318.
- 668 Barbui, T., and Falanga, A. (2016). Molecular biomarkers of thrombosis in myeloproliferative neoplasms.  
669 *Thromb Res* 140 Suppl 1, S71-75.
- 670 Best, M. G., Sol, N., Kooi, I., Tannous, J., Westerman, B. A., Rustenburg, F., Schellen, P., Verschueren, H.,  
671 Post, E., Koster, J., Ylstra, B., *et al.* (2015). RNA-Seq of Tumor-Educated Platelets Enables Blood-Based  
672 Pan-Cancer, Multiclass, and Molecular Pathway Cancer Diagnostics. *Cancer Cell* 28, 666-676.
- 673 Bres, V., Yoh, S. M., and Jones, K. A. (2008). The multi-tasking P-TEFb complex. *Curr Opin Cell Biol* 20,  
674 334-340.
- 675 Campbell, R. A., Franks, Z., Bhatnagar, A., Rowley, J. W., Manne, B. K., Supiano, M. A., Schwertz, H.,  
676 Weyrich, A. S., and Rondina, M. T. (2018). Granzyme A in human platelets regulates the synthesis of  
677 proinflammatory cytokines by monocytes in aging. *J Immunol* 200, 295-304.
- 678 Caparros-Perez, E., Teruel-Montoya, R., Lopez-Andreo, M. J., Llanos, M. C., Rivera, J., Palma-Barqueros,  
679 V., Blanco, J. E., Vicente, V., Martinez, C., and Ferrer-Marin, F. (2017). Comprehensive comparison of  
680 neonate and adult human platelet transcriptomes. *PLoS One* 12, e0183042.
- 681 Clancy, L., and Freedman, J. E. (2016). Blood-Derived Extracellular RNA and Platelet Pathobiology: Adding  
682 Pieces to a Complex Circulating Puzzle. *Circulation research* 118, 374-376.
- 683 Clark, R. A., Li, S.-L., Pearson, D. W., Leidal, K. G., Clark, J. R., Denning, G. M., Reddick, R., Krause, K.-H.,  
684 and Valente, A. J. (2002). Regulation of calreticulin expression during induction of differentiation in human  
685 myeloid cells. Evidence for remodeling of the endoplasmic reticulum. *J Biol Chem* 277, 32369-32378.
- 686 Cummings, B. B., Marshall, J. L., Tukiainen, T., Lek, M., Donkervoort, S., Foley, A. R., Bolduc, V., Waddell,  
687 L. B., Sandaradura, S. A., O'Grady, G. L., Estrella, E., *et al.* (2017). Improving genetic diagnosis in  
688 Mendelian disease with transcriptome sequencing. *Sci Transl Med* 9.
- 689 Cunin, P., Bouslama, R., Machlus, K. R., Martinez-Bonet, M., Lee, P. Y., Wactor, A., Nelson-Maney, N.,  
690 Morris, A., Guo, L., Weyrich, A., Sola-Visner, M., *et al.* (2019). Megakaryocyte emperipolesis mediates  
691 membrane transfer from intracytoplasmic neutrophils to platelets. *elife* 8.
- 692 Curto-Garcia, N., Harrison, C., and McLornan, D. P. (2020). Bone marrow niche dysregulation in  
693 myeloproliferative neoplasms. *Haematologica* 105, 1189-1200.

- 694 Davizon-Castillo, P., Rowley, J. W., and Rondina, M. T. (2020). Megakaryocyte and Platelet  
695 Transcriptomics for Discoveries in Human Health and Disease. *Arterioscler Thromb Vasc Biol* *40*, 1432-  
696 1440.
- 697 Dunbar, A., Nazir, A., and Levine, R. (2017). Overview of Transgenic Mouse Models of Myeloproliferative  
698 Neoplasms (MPNs). *Curr Protoc Pharmacol* *77*, 14 40 11-14 40 19.
- 699 Finazzi, G., De Stefano, V., and Barbui, T. (2013). Are MPNs vascular diseases? *Current hematologic*  
700 *malignancy reports* *8*, 307-316.
- 701 Fruman, D. A., Chiu, H., Hopkins, B. D., Bagrodia, S., Cantley, L. C., and Abraham, R. T. (2017). The PI3K  
702 Pathway in Human Disease. *Cell* *170*, 605-635.
- 703 Frydman, G. H., Tessier, S. N., Wong, K. H. K., Vanderburg, C. R., Fox, J. G., Toner, M., Tompkins, R. G.,  
704 and Irimia, D. (2020). Megakaryocytes contain extranuclear histones and may be a source of platelet-  
705 associated histones during sepsis. *Sci Rep* *10*, 4621.
- 706 Gangaraju, R., Song, J., Kim, S. J., Tashi, T., Reeves, B. N., Sundar, K. M., Thiagarajan, P., and Prchal, J.  
707 T. (2020). Thrombotic, inflammatory, and HIF-regulated genes and thrombosis risk in polycythemia vera  
708 and essential thrombocythemia. *Blood Adv* *4*, 1115-1130.
- 709 Geyer, H. L., Dueck, A. C., Scherber, R. M., and Mesa, R. A. (2015). Impact of inflammation on  
710 myeloproliferative neoplasm symptom development. *Mediators Inflamm* *2015*, 284706.
- 711 Gilles, L., Finke, C., Lasho, T. L., Pardanani, A., Tefferi, A., and Crispino, J. (2012). Aberrant megakaryocyte  
712 gene expression contributes to primary myelofibrosis. *Blood* *120*, 2867-2867.
- 713 Gnatenko, D. V., Dunn, J. J., McCorkle, S. R., Weissmann, D., Perrotta, P. L., and Bahou, W. F. (2003).  
714 Transcript profiling of human platelets using microarray and serial analysis of gene expression. *Blood* *101*,  
715 2285-2293.
- 716 Guo, B. B., Linden, M. D., Fuller, K. A., Phillips, M., Mirzai, B., Wilson, L., Chuah, H., Liang, J., Howman, R.,  
717 Grove, C. S., Malherbe, J. A., *et al.* (2019). Platelets in myeloproliferative neoplasms have a distinct  
718 transcript signature in the presence of marrow fibrosis. *Br J Haematol*.
- 719 Guo, B. B., Linden, M. D., Fuller, K. A., Phillips, M., Mirzai, B., Wilson, L., Chuah, H., Liang, J., Howman, R.,  
720 Grove, C. S., Malherbe, J. A., *et al.* (2020). Platelets in myeloproliferative neoplasms have a distinct  
721 transcript signature in the presence of marrow fibrosis. *Br J Haematol* *188*, 272-282.
- 722 Hasselbalch, H. C., and Bjorn, M. E. (2015). MPNs as Inflammatory Diseases: The Evidence,  
723 Consequences, and Perspectives. *Mediators Inflamm* *2015*, 102476.
- 724 Hinds, D. A., Barnholt, K. E., Mesa, R. A., Kiefer, A. K., Do, C. B., Eriksson, N., Mountain, J. L., Francke, U.,  
725 Tung, J. Y., Nguyen, H. M., Zhang, H., *et al.* (2016). Germ line variants predispose to both JAK2 V617F  
726 clonal hematopoiesis and myeloproliferative neoplasms. *Blood* *128*, 1121-1128.
- 727 Kaushik, S., and Cuervo, A. M. (2015). Proteostasis and aging. *Nature Medicine* *21*, 1406-1415.
- 728 Kleppe, M., Koche, R., Zou, L., van Galen, P., Hill, C. E., Dong, L., De Groote, S., Papalex, E., Hanasoge  
729 Somasundara, A. V., Corder, K., Keller, M., *et al.* (2018). Dual Targeting of Oncogenic Activation and



- 730 Inflammatory Signaling Increases Therapeutic Efficacy in Myeloproliferative Neoplasms. *Cancer Cell* 33,  
731 785-787.
- 732 Koschmieder, S., and Chatain, N. (2020). Role of inflammation in the biology of myeloproliferative  
733 neoplasms. *Blood Rev* 42, 100711.
- 734 Krause, D. S., and Crispino, J. D. (2013). Molecular pathways: induction of polyploidy as a novel  
735 differentiation therapy for leukemia. *Clin Cancer Res* 19, 6084-6088.
- 736 Krishnan, A., Zhang, Y., Perkins, C., Gotlib, J., and Zehnder, J. L. (2017). Platelet Transcriptomic  
737 Signatures in Myeloproliferative Neoplasms. *Blood* 130, 5288.
- 738 Kukurba, K. R., and Montgomery, S. B. (2015). RNA Sequencing and Analysis. *Cold Spring Harb Protoc*  
739 2015, 951-969.
- 740 LaFave, L. M., and Levine, R. L. (2016). Targeting a regulator of protein homeostasis in myeloproliferative  
741 neoplasms. *Nat Med* 22, 20-21.
- 742 Langmead, B., and Salzberg, S. L. (2012). Fast gapped-read alignment with Bowtie 2. *Nat Methods* 9, 357-  
743 359.
- 744 Li, B., and Dewey, C. N. (2011). RSEM: accurate transcript quantification from RNA-Seq data with or  
745 without a reference genome. *BMC Bioinformatics* 12, 323.
- 746 Liberzon, A., Birger, C., Thorvaldsdottir, H., Ghandi, M., Mesirov, J. P., and Tamayo, P. (2015). The  
747 Molecular Signatures Database (MSigDB) hallmark gene set collection. *Cell Syst* 1, 417-425.
- 748 Liu, L., Inoki, A., Fan, K., Mao, F., Shi, G., Jin, X., Zhao, M., Ney, G., Jones, M. A., Sun, S., Dou, Y., *et al.*  
749 (2020). ER associated degradation preserves hematopoietic stem cell quiescence and self-renewal by  
750 restricting mTOR activity. *Blood*.
- 751 Love, M. I., Huber, W., and Anders, S. (2014). Moderated estimation of fold change and dispersion for  
752 RNA-seq data with DESeq2. *Genome Biol* 15, 550.
- 753 Lussana, F., Carobbio, A., Salmoiraghi, S., Guglielmelli, P., Vannucchi, A. M., Bottazzi, B., Leone, R.,  
754 Mantovani, A., Barbui, T., and Rambaldi, A. (2017). Driver mutations (JAK2V617F, MPLW515L/K or CALR),  
755 pentraxin-3 and C-reactive protein in essential thrombocythemia and polycythemia vera. *J Hematol Oncol*  
756 10, 54.
- 757 Manne, B. K., Denorme, F., Middleton, E. A., Portier, I., Rowley, J. W., Stubben, C., Petrey, A. C., Tolley, N.  
758 D., Guo, L., Cody, M., Weyrich, A. S., *et al.* (2020). Platelet gene expression and function in patients with  
759 COVID-19. *Blood* 136, 1317-1329.
- 760 Marin Oyarzún, C. P., and Heller, P. G. (2019). Platelets as mediators of thromboinflammation in chronic  
761 myeloproliferative neoplasms. *Front Immunol* 10, 1373.
- 762 Mascarenhas, J., Roper, N., Chaurasia, P., and Hoffman, R. (2011). Epigenetic abnormalities in  
763 myeloproliferative neoplasms: a target for novel therapeutic strategies. *Clin Epigenetics* 2, 197-212.

- 764 Matsuura, S., Thompson, C. R., Belghasem, M. E., Bekendam, R. H., Piasecki, A., Leiva, O., Ray, A.,  
765 Italiano, J., Yang, M., Merrill-Skoloff, G., Chitalia, V. C., *et al.* (2020). Platelet Dysfunction and Thrombosis in  
766 JAK2(V617F)-Mutated Primary Myelofibrotic Mice. *Arterioscler Thromb Vasc Biol* 40, e262-e272.
- 767 Mead, T. J., and Apte, S. S. (2018). ADAMTS proteins in human disorders. *Matrix Biol* 71-72, 225-239.
- 768 Merlinsky, T. R., Levine, R. L., and Pronier, E. (2019). Unfolding the Role of Calreticulin in Myeloproliferative  
769 Neoplasm Pathogenesis. *Clin Cancer Res* 25, 2956-2962.
- 770 Middleton, E. A., Rowley, J. W., Campbell, R. A., Grissom, C. K., Brown, S. M., Beesley, S. J., Schwertz,  
771 H., Kosaka, Y., Manne, B. K., Krauel, K., Tolley, N. D., *et al.* (2019). Sepsis alters the transcriptional and  
772 translational landscape of human and murine platelets. *Blood* 134, 911-923.
- 773 Moniz, L. S., Surinova, S., Ghazaly, E., Velasco, L. G., Haider, S., Rodriguez-Prados, J. C., Berenjano, I.  
774 M., Chelala, C., and Vanhaesebroeck, B. (2017). Phosphoproteomic comparison of Pik3ca and Pten  
775 signalling identifies the nucleotidase NT5C as a novel AKT substrate. *Sci Rep* 7, 39985.
- 776 Moons, K. G., Kengne, A. P., Grobbee, D. E., Royston, P., Vergouwe, Y., Altman, D. G., and Woodward, M.  
777 (2012). Risk prediction models: II. External validation, model updating, and impact assessment. *Heart* 98,  
778 691-698.
- 779 Mughal, T. I., Pemmaraju, N., Radich, J. P., Deininger, M. W., Kucine, N., Kiladjan, J. J., Bose, P., Gotlib,  
780 J., Valent, P., Chen, C. C., Barbui, T., *et al.* (2019). Emerging translational science discoveries, clonal  
781 approaches, and treatment trends in chronic myeloproliferative neoplasms. *Hematol Oncol* 37, 240-252.
- 782 Mullally, A., Bruedigam, C., Poveromo, L., Heidel, F. H., Purdon, A., Vu, T., Austin, R., Heckl, D., Breyfogle,  
783 L. J., Kuhn, C. P., Kalaitzidis, D., *et al.* (2013). Depletion of Jak2V617F myeloproliferative neoplasm-  
784 propagating stem cells by interferon-alpha in a murine model of polycythemia vera. *Blood* 121, 3692-3702.
- 785 Nguyen, H. M., and Gotlib, J. (2012). Insights into the molecular genetics of myeloproliferative neoplasms.  
786 *Am Soc Clin Oncol Educ Book*, 411-418.
- 787 Oh, S. T., and Gotlib, J. (2010). JAK2 V617F and beyond: role of genetics and aberrant signaling in the  
788 pathogenesis of myeloproliferative neoplasms. *Expert Rev Hematol* 3, 323-337.
- 789 Osorio, F. G., Soria-Valles, C., Santiago-Fernandez, O., Bernal, T., Mittelbrunn, M., Colado, E., Rodriguez,  
790 F., Bonzon-Kulichenko, E., Vazquez, J., Porta-de-la-Riva, M., Ceron, J., *et al.* (2016). Loss of the  
791 proteostasis factor AIRAPL causes myeloid transformation by deregulating IGF-1 signaling. *Nat Med* 22,  
792 91-96.
- 793 Papaemmanuil, E., Gerstung, M., Bullinger, L., Gaidzik, V. I., Paschka, P., Roberts, N. D., Potter, N. E.,  
794 Heuser, M., Thol, F., Bolli, N., Gundem, G., *et al.* (2016). Genomic Classification and Prognosis in Acute  
795 Myeloid Leukemia. *N Engl J Med* 374, 2209-2221.
- 796 Passamonti, F., Cervantes, F., Vannucchi, A. M., Morra, E., Rumi, E., Pereira, A., Guglielmelli, P.,  
797 Pungolino, E., Caramella, M., Maffioli, M., Pascutto, C., *et al.* (2010). A dynamic prognostic model to  
798 predict survival in primary myelofibrosis: a study by the IWG-MRT (International Working Group for  
799 Myeloproliferative Neoplasms Research and Treatment). *Blood* 115, 1703-1708.

- 800 Raghavachari, N., Xu, X., Harris, A., Villagra, J., Logun, C., Barb, J., Solomon, M. A., Suffredini, A. F.,  
801 Danner, R. L., Kato, G., Munson, P. J., *et al.* (2007). Amplified expression profiling of platelet transcriptome  
802 reveals changes in arginine metabolic pathways in patients with sickle cell disease. *Circulation* *115*, 1551-  
803 1562.
- 804 Rampal, R., Al-Shahrour, F., Abdel-Wahab, O., Patel, J. P., Brunel, J.-P., Mermel, C. H., Bass, A. J., Pretz,  
805 J., Ahn, J., Hricik, T., Kilpivaara, O., *et al.* (2014). Integrated genomic analysis illustrates the central role of  
806 JAK-STAT pathway activation in myeloproliferative neoplasm pathogenesis. *Blood* *123*, e123-133.
- 807 Rondina, M. T., Voora, D., Simon, L. M., Schwertz, H., Harper, J. F., Lee, O., Bhatlekar, S. C., Li, Q.,  
808 Eustes, A. S., Montenont, E., Campbell, R. A., *et al.* (2020). Longitudinal RNA-Seq Analysis of the  
809 Repeatability of Gene Expression and Splicing in Human Platelets Identifies a Platelet SELP Splice QTL.  
810 *Circulation research* *126*, 501-516.
- 811 Rondina, M. T., Weyrich, A. S., and Zimmerman, G. A. (2013). Platelets as cellular effectors of inflammation  
812 in vascular diseases. *Circulation research* *112*, 1506-1519.
- 813 Rontauroli, S., Castellano, S., Guglielmelli, P., Zini, R., Bianchi, E., Genovese, E., Carretta, C., Parenti, S.,  
814 Fantini, S., Mallia, S., Tavernari, L., *et al.* (2021). Gene expression profile correlates with molecular and  
815 clinical features in patients with myelofibrosis. *Blood Adv* *5*, 1452-1462.
- 816 Rowley, J. W., Oler, A. J., Tolley, N. D., Hunter, B. N., Low, E. N., Nix, D. A., Yost, C. C., Zimmerman, G.  
817 A., and Weyrich, A. S. (2011). Genome-wide RNA-seq analysis of human and mouse platelet  
818 transcriptomes. *Blood* *118*, e101-111.
- 819 Rowley, J. W., Schwertz, H., and Weyrich, A. S. (2012). Platelet mRNA: the meaning behind the message.  
820 *Curr Opin Hematol* *19*, 385-391.
- 821 Rowley, J. W., Weyrich, A. S., and Bray, P. F. (2019). The platelet transcriptome in health and disease. In  
822 *Platelets*, (Elsevier), pp. 139-153.
- 823 Rumi, E., and Cazzola, M. (2017). Diagnosis, risk stratification, and response evaluation in classical  
824 myeloproliferative neoplasms. *Blood* *129*, 680-692.
- 825 Sampieri, L., Di Giusto, P., and Alvarez, C. (2019). CREB3 Transcription Factors: ER-Golgi Stress  
826 Transducers as Hubs for Cellular Homeostasis. *Front Cell Dev Biol* *7*, 123.
- 827 Schischlik, F., Jager, R., Rosebrock, F., Hug, E., Schuster, M., Holly, R., Fuchs, E., Milosevic Feenstra, J.  
828 D., Bogner, E., Gisslinger, B., Schalling, M., *et al.* (2019). Mutational landscape of the transcriptome offers  
829 putative targets for immunotherapy of myeloproliferative neoplasms. *Blood* *134*, 199-210.
- 830 Schubert, S., Weyrich, A. S., and Rowley, J. W. (2014). A tour through the transcriptional landscape of  
831 platelets. *Blood* *124*, 493-502.
- 832 Simon, L. M., Edelstein, L. C., Nagalla, S., Woodley, A. B., Chen, E. S., Kong, X., Ma, L., Fortina, P.,  
833 Kunapuli, S., Holinstat, M., McKenzie, S. E., *et al.* (2014). Human platelet microRNA-mRNA networks  
834 associated with age and gender revealed by integrated plateletomics. *Blood* *123*, e37-45.

- 835 Skov, V., Larsen, T. S., Thomassen, M., Riley, C., Jensen, M. K., Bjerrum, O. W., Kruse, T. A., and  
836 Hasselbalch, H. C. (2010). Increased Expression of Proteasome-Related Genes In Patients with Primary  
837 Myelofibrosis. *Blood* 116, 4117.
- 838 Skov, V., Larsen, T. S., Thomassen, M., Riley, C. H., Jensen, M. K., Bjerrum, O. W., Kruse, T. A., and  
839 Hasselbalch, H. C. (2011). Whole-blood transcriptional profiling of interferon-inducible genes identifies  
840 highly upregulated IFI27 in primary myelofibrosis. *European Journal of Haematology* 87, 54-60.
- 841 Skov, V., Larsen, T. S., Thomassen, M., Riley, C. H., Jensen, M. K., Bjerrum, O. W., Kruse, T. A., and  
842 Hasselbalch, H. C. (2012). Molecular profiling of peripheral blood cells from patients with polycythemia  
843 vera and related neoplasms: identification of deregulated genes of significance for inflammation and  
844 immune surveillance. *Leuk Res* 36, 1387-1392.
- 845 Spivak, J. L. (2017). Myeloproliferative Neoplasms. *N Engl J Med* 376, 2168-2181.
- 846 Spivak, J. L., Considine, M., Williams, D. M., Talbot, C. C., Jr., Rogers, O., Moliterno, A. R., Jie, C., and  
847 Ochs, M. F. (2014). Two clinical phenotypes in polycythemia vera. *N Engl J Med* 371, 808-817.
- 848 Subramanian, A., Tamayo, P., Mootha, V. K., Mukherjee, S., Ebert, B. L., Gillette, M. A., Paulovich, A.,  
849 Pomeroy, S. L., Golub, T. R., Lander, E. S., and Mesirov, J. P. (2005). Gene set enrichment analysis: a  
850 knowledge-based approach for interpreting genome-wide expression profiles. *Proc Natl Acad Sci U S A*  
851 102, 15545-15550.
- 852 Tefferi, A., Abdel-Wahab, O., Cervantes, F., Crispino, J. D., Finazzi, G., Girodon, F., Gisslinger, H., Gotlib,  
853 J., Kiladjian, J. J., Levine, R. L., Licht, J. D., *et al.* (2011). Mutations with epigenetic effects in  
854 myeloproliferative neoplasms and recent progress in treatment: Proceedings from the 5th International  
855 Post-ASH Symposium. *Blood Cancer J* 1, e7.
- 856 Tefferi, A., Lasho, T. L., Guglielmelli, P., Finke, C. M., Rotunno, G., Elala, Y., Pacilli, A., Hanson, C. A.,  
857 Pancrazzi, A., Ketterling, R. P., Mannarelli, C., *et al.* (2016). Targeted deep sequencing in polycythemia  
858 vera and essential thrombocythemia. *Blood Adv* 1, 21-30.
- 859 Tibshirani, R. (1996). Regression shrinkage and selection via the lasso. *Journal of the Royal Statistical*  
860 *Society Series B (Methodological)*, 267-288.
- 861 Vainchenker, W., and Kralovics, R. (2017). Genetic basis and molecular pathophysiology of classical  
862 myeloproliferative neoplasms. *Blood* 129, 667-679.
- 863 Vainchenker, W., Leroy, E., Gilles, L., Marty, C., Plo, I., and Constantinescu, S. N. (2018). JAK inhibitors for  
864 the treatment of myeloproliferative neoplasms and other disorders. *F1000Res* 7, 82.
- 865 Vannucchi, A. M., Antonioli, E., Guglielmelli, P., Pardanani, A., and Tefferi, A. (2008). Clinical correlates of  
866 JAK2V617F presence or allele burden in myeloproliferative neoplasms: a critical reappraisal. *Leukemia* 22,  
867 1299-1307.
- 868 Wang, C. Y., Li, C. Y., Hsu, H. P., Cho, C. Y., Yen, M. C., Weng, T. Y., Chen, W. C., Hung, Y. H., Lee, K. T.,  
869 Hung, J. H., Chen, Y. L., *et al.* (2017). PSMB5 plays a dual role in cancer development and  
870 immunosuppression. *Am J Cancer Res* 7, 2103-2120.

- 871 Wen, Q. J., Woods, B., Yang, Q., Sophia, C., Lillu, G., Rapaport, F., Levine, R. L., and Crispino, J. (2016).  
872 Activation of JAK/STAT signaling in megakaryocytes is necessary and sufficient for myeloproliferation in  
873 vivo. *Blood* 128, 949-949.
- 874 Wen, Q. J., Yang, Q., Goldenson, B., Malinge, S., Lasho, T., Schneider, R. K., Breyfogle, L. J., Schultz, R.,  
875 Gilles, L., Koppikar, P., Abdel-Wahab, O., *et al.* (2015). Targeting megakaryocytic-induced fibrosis in  
876 myeloproliferative neoplasms by AURKA inhibition. *Nat Med* 21, 1473-1480.
- 877 Weyrich, A. S. (2014). Platelets: more than a sack of glue. *Hematology Am Soc Hematol Educ Program*  
878 2014, 400-403.
- 879 Weyrich, A. S., and Zimmerman, G. A. (2003). Evaluating the relevance of the platelet transcriptome. *Blood*  
880 102, 1550-1551.
- 881 Weyrich, A. S., and Zimmerman, G. A. (2013). Platelets in lung biology. *Annual review of physiology* 75,  
882 569-591.
- 883 Williams, N., Lee, J., Moore, L., Baxter, E. J., Hewinson, J., Dawson, K. J., Menzies, A., Godfrey, A. L.,  
884 Green, A. R., Campbell, P. J., and Nangalia, J. (2020). Phylogenetic reconstruction of myeloproliferative  
885 neoplasm reveals very early origins and lifelong evolution. *BioRxiv*, 2020.2011.2009.374710.
- 886 Wong, W. J., Baltay, M., Getz, A., Fuhrman, K., Aster, J. C., Hasserjian, R. P., and Pozdnyakova, O. (2019).  
887 Gene expression profiling distinguishes prefibrotic from overtly fibrotic myeloproliferative neoplasms and  
888 identifies disease subsets with distinct inflammatory signatures. *PLoS One* 14, e0216810.
- 889 Woods, B., Chen, W., Chiu, S., Marinaccio, C., Fu, C., Gu, L., Bulic, M., Yang, Q., Zouak, A., Jia, S.,  
890 Suraneni, P. K., *et al.* (2019). Activation of JAK/STAT Signaling in Megakaryocytes Sustains  
891 Myeloproliferation In Vivo. *Clin Cancer Res* 25, 5901-5912.
- 892 Yan, B., Freiwald, T., Chauss, D., Wang, L., West, E., Mirabelli, C., Zhang, C. J., Nichols, E.-M., Malik, N.,  
893 Gregory, R., Bantscheff, M., *et al.* (2021). SARS-CoV-2 drives JAK1/2-dependent local complement  
894 hyperactivation. *Science Immunology* 6, eabg0833.
- 895 Zeddies, S., Jansen, S. B., di Summa, F., Geerts, D., Zwaginga, J. J., van der Schoot, C. E., von Lindern,  
896 M., and Thijssen-Timmer, D. C. (2014). MEIS1 regulates early erythroid and megakaryocytic cell fate.  
897 *Haematologica* 99, 1555-1564.
- 898 Zhou, T., Georgeon, S., Moser, R., Moore, D. J., Caflisch, A., and Hantschel, O. (2014). Specificity and  
899 mechanism-of-action of the JAK2 tyrosine kinase inhibitors ruxolitinib and SAR302503 (TG101348).  
900 *Leukemia* 28, 404-407.
- 901 Zoi, K., and Cross, N. C. (2017). Genomics of Myeloproliferative Neoplasms. *J Clin Oncol* 35, 947-954.

903

904

905

906 **Figure Legends**

907

908 **Figure 1: Two independent MPN clinical cohorts and closely replicated patient variables.**

909 **A**, Similarity in distribution of MPN subtypes between two cohorts of MPN patients (Stanford single-center;  
910 approximately 2 years apart: cohort 1: 2016-17, n=71; and cohort 2: 2019, n=49); the majority subtype is  
911 MF in both cohorts (34% of n=71 and 37% of n=49). **B**, Comparable distribution of age across MPN  
912 subtypes in the two cohorts. Violin plots of patient age from each MPN subtype reflect clinical expectation,  
913 with a fairly identical match between the two cohorts. Slightly higher median age noted in the second  
914 cohort for ET and PV patients alone. **C**, Comparable and balanced distribution of gender across MPN  
915 subtypes in the two cohorts. Larger percentage of male healthy controls in both cohorts and smaller  
916 percentage of males in ET cohort 1 noted. **D**, Matched distribution of primarily *JAK2* and *CALR* mutational  
917 status across MPN subtypes in the two cohorts. *JAK2* is the most common mutation across all three  
918 subtypes; 100% of PV and over 50% of ET and MF patients have *JAK2* mutation in both cohorts.  
919 Mismatch between cohorts on the *MPL*/triple negative patients is noted as a natural consequence of the  
920 rarer prevalence of these mutations; and therefore, not the primary focus of this work. **E**, Diversity of MPN  
921 patient therapies across the two cohorts reflecting current clinical practice. The majority being aspirin  
922 (ASA) in ET/PV patients and the *JAK*-inhibitor, ruxolitinib in MF. Note that a given patient may be on more  
923 than one treatment and therefore, the total treatment percentage in this graphic may not equal 100. To  
924 control for any inter-patient variability, all treatment, in addition to patient age and gender are adjusted as  
925 confounding factors in downstream gene expression analyses. **F**, Representative clinical laboratory  
926 variables, as box plots, measured at the same date and time as platelet sampling. Compared to controls,  
927 MPN patients show larger variance (inter-quartile range, IQR), and reflect current clinical knowledge.  
928 Groups differ primarily only with respect to blood cell counts (platelet/RBC/WBC); and show the greatest  
929 differential in MF. Note higher platelet count in ET with a concomitant lower mean platelet volume, higher  
930 red blood cell count in PV and lower red blood cell count in MF with concomitantly lower hemoglobin,  
931 hematocrit and higher red cell width. Wilcoxon signed rank tests marked by asterisks indicate a  
932 statistically significant difference between any two groups (\*  $p \leq 0.05$ ; \*\*  $p \leq 0.01$ ; \*\*\*  $p \leq 0.001$ ; \*\*\*\*  
933  $p \leq 0.0001$ ). **G**, High correlation ( $R^2 = 0.89$ ) of platelet gene expression as assessed by normalized counts  
934 of matched transcripts in each cohort between each of controls, ET, PV and MF. The two-cohort collective  
935 sample size totals n=120, affording increased statistical power for subsequent analyses.

936

937

938

939

940

941

942 **Figure 2: MPN platelet transcriptome distinguishes disease phenotype and reveals phenotype- and**  
943 **JAK-inhibitor specific signatures.**

944 **A**, Unsupervised principal component analysis (PCA) of normalized platelet gene expression counts  
945 adjusted for age, gender, treatment and experimental batch. Three panels of PC1 and PC2 colored by  
946 MPN subtype; and each contrasted with controls (n=21, yellow): ET (n=24, top, light green), PV (n=33,  
947 middle, dark green) and MF (n=42, bottom, dark blue). Circles filled or open mark presence or absence of  
948 ruxolitinib treatment; and size of circles, smaller or larger, indicate presence or absence of *JAK2* mutation.  
949 The first two principal components account for 48% of total variance in the data. **B**, Volcano plots (three  
950 panels as **a** above of ET, PV and MF) of differential gene expression showing statistical significance  
951 (negative log<sub>10</sub> of p-values) versus log<sub>2</sub> fold change of each gene. Significant up-regulated and down-  
952 regulated genes are those with p-values (FDR) smaller or equal to 0.05 and absolute value of fold changes  
953 larger or equal to 1.5. **C,D**, Venn Diagram comparisons of MPN differential gene expression lists. In **c**, each  
954 of ET, PV and MF is contrasted with controls; identifying gene sets that are shared (n=1504, FDR < 0.05)  
955 as well as unique to each subtype. In **D**, differential in the RUX-treated cohort is contrasted with MF vs  
956 controls. Differential in gene expression in RUX-treated cohort is a fraction of the total differential noted in  
957 the MF transcriptome. **E**, Volcano plot of differential gene expression between MPN patients treated with  
958 ruxolitinib and not. A small subset of overlapping differential genes that are upregulated in MF (**B**, bottom  
959 panel) and suppressed in the RUX-treated cohort (**E**) are colored in green.

960

961 **Figure 3: Graded differential expression by MPN phenotype and driver mutation status**

962 **A-D**, Hierarchically clustered heatmaps of the top 10 differentially expressed genes (DEGs) from controls  
963 (FDR<0.01) of all MPN (**A**), and MF, ET, and PV each separately (**B-D**). Colored annotation is provided to  
964 indicate MPN subtype, age, gender, mutation and ruxolitinib treatment. Rows indicate gradation in gene  
965 expression on a blue (low) to red (high) scale. Columns indicate sample type from controls (CTRL) to ET,  
966 PV and MF.

967

968

969

970 **Figure 4: Altered immune, metabolic, and proteostatic pathways underlie each MPN phenotype**

971 **A**, Pathway-enrichment analysis of genes with MPN subtype-specific expression (color indicated; light  
972 green ET, dark green PV, and dark blue MF) overlaid with ruxolitinib-specific expression (light blue). Each  
973 point represents a pathway; the x-axis gives the normalized enrichment score, which reflects the degree to  
974 which each pathway is over or under-represented at the top or bottom of the ranked list of differentially  
975 expressed genes, normalized to account for differences in gene set size and in correlations between gene  
976 sets and the expression data set. The y-axis lists the detail-level node of the most enriched pathways;  
977 solid lines mark GSEA-recommended (Subramanian et al., 2005) Bonferroni-corrected statistical  
978 significance criterion of  $FDR < 0.25$  for exploratory analyses. Dotted lines mark  $FDR > 0.25$  and therefore,  
979 not sufficiently significant, yet visualized alongside solid lines to retain overall context (upper-level parent  
980 nodes of the detail-level pathways are provided in **Table S3A-C**). Multiple immune and inflammatory  
981 pathways are consistently significantly enriched across ET, PV and MF (and suppressed in the ruxolitinib-  
982 treated cohort). MF is differentiated from ET and PV through dysregulation of additional molecular  
983 processes for cellular development, proliferation, metabolism and DNA damage.

984

985

986

987

988

989

990

991

992

993

994

995



996 **Figure 5: Prediction of MF based on unique and progressive MPN platelet transcriptome**

997 **A, B** Top few genes (out of 3000+) demonstrating monotonic progressive gene expression (log 2 fold  
998 change in expression *y*-axis, FDR < 0.01, *Mann-Kendall* test with Bonferroni correction) across *x*-axes **A**,  
999 CTRL-to-ET-to-MF and **B**, CTRL-to-PV-to-MF. **C**, Lasso-penalized multinomial logistic regression model  
1000 under temporal validation *i.e.* trained on Stanford cohort 1 (n=71, 2016-17, Figure 1a) and validated on  
1001 Stanford cohort 2 (n=49, 2019, Figure 1a) as test set. **D**, Lasso-penalized multinomial logistic regression  
1002 model under geographical validation using two independently published datasets for training (cohort 3,  
1003 n=31 healthy controls in addition to Stanford 1 & 2 cohorts) and validation (cohort 4, n=25 MF and n=15  
1004 healthy controls). **E**, Receiver Operating Curves (ROC) toward MF prediction under conditions of temporal  
1005 (**C**) and geographical (**D**) validation. Temporal validation uses three layered models: i) baseline, with no  
1006 gene expression data but patient age, gender and mutation alone; ii) adding entire MPN platelet  
1007 transcriptome and iii) adding MPN progressive genes alone. Outperformance of the progressive  
1008 transcriptome model (red curve, AUROC=0.96) vis-a-vis the entire transcriptome dataset (blue curve,  
1009 AUROC=0.95) and lastly, the baseline model without gene expression (black curve, AUROC=0.68).  
1010 Geographical validation using the progressive transcriptome model also demonstrates independent high  
1011 MF predictive accuracy (green curve, AUROC=0.97). **F**, Heatmap of top recurring Lasso-selected  
1012 progressive genes for each of controls (left column, CTRL, yellow bar), ET (light green), PV (dark green)  
1013 and MF (dark blue). Rows indicate gradation in gene expression on a blue (low) to red (high) scale.  
1014 Columns indicate sample type (CTRL, ET, PV and MF).

1015

1016

1017

1018

1019

1020

1021

1022

1023  
1024  
  
1025  
  
1026  
  
1027  
  
1028  
  
1029  
  
1030  
  
1031  
  
1032  
  
1033  
  
1034  
  
1035  
  
1036  
  
1037  
  
1038  
  
1039  
  
1040  
  
1041  
  
1042  
  
1043  
  
1044  
  
1045  
  
1046  
  
1047  
  
1048  
  
1049  
  
1050

## Supplementary Figure Legends

**Figure S1: Platelets isolated for RNA-sequencing. A.** Flow cytometry analysis for purity of platelets (CD61+) isolated from whole blood. Population (quadrant 3, outlined in red) showing 96% pure platelets prior to enrichment by depletion of CD45 leukocytes. **B.** CD45 magnetic microbeads were used to deplete leukocytes, further enriching platelet population. Platelets enriched from magnetic sorting were confirmed for ~99% platelet purity using a Cell-Dyn Hematology Analyzer prior to isolation of RNA. Standard trizol RNA extraction protocol was used to extract RNA. **C.** Representative electropherogram results from Agilent Bioanalyzer showing RNA isolated from platelets with an RNA Integrity Number of 9.4. **D.** Electropherogram showing a clean product following cDNA synthesis and amplification. Similar procedure was carried out for all samples and by the same individual.

**Figure S2:** Volcano plots (showing statistical significance, negative log<sub>10</sub> of p-values, versus log<sub>2</sub> fold change of each gene) of differential gene expression analysis of a sub-cohort of MF versus ET and PV patients combined. Significant up- and down-regulated genes are those with p-values (FDR) smaller or equal to 0.05 and absolute value of fold changes larger or equal to 1.5. Possible mediators of fibrosis-associated genes are highlighted and include pro-fibrotic growth factors and other matrix proteins.

## **Figure S3: Correlation of MF platelet transcriptome with disease risk by Dynamic International Prognostic Scoring System (DIPSS)**

**A,** Unsupervised principal component analysis (PCA) of MF (n=42) normalized platelet gene expression counts adjusted for age, gender, treatment and experimental batch. PC1 and PC2 colored by DIPSS score (0-6 denoting increasing MF risk). Circles filled or open mark presence or absence of ruxolitinib treatment; and size of circles, smaller or larger, indicate presence or absence of *JAK2* mutation.

1051 **Figure S4: Relative molecular trajectories of MPN progression**

1052 The relative enrichment of MPN molecular pathways reflecting MPN progression within specific biological  
1053 process categories.(Liberzon et al., 2015) Each color-indicated line represents a pathway category. *x*-axis  
1054 captures sample type from controls (CTRL) to ET, PV and MF, and the *y*-axis gives the normalized  
1055 enrichment score, which reflects the degree to which each pathway is over or under-represented at the  
1056 top or bottom of the ranked list of differentially expressed genes, normalized to account for differences in  
1057 gene set size and in correlations between gene sets and the expression data set.

1058

1059 **Figure S5:** Receiver Operating Curves (ROC) toward MF prediction from ET or PV alone with temporal  
1060 validation and three layered models: i) baseline, with no gene expression data but patient age, gender and  
1061 mutation status (as Figure 5E) and an additional two clinical variables: platelet count and hemoglobin; ii)  
1062 adding entire MPN platelet transcriptome to the above baseline and iii) adding MPN progressive genes  
1063 alone. Outperformance of the progressive transcriptome model (red curve, AUROC=0.97) vis-a-vis the  
1064 entire transcriptome dataset (blue curve, AUROC=0.93) and the baseline model without gene expression  
1065 (black curve, AUROC=0.83).

1066

1067 **Figure S6:** Unsupervised principal component analysis of platelet transcriptomic data from Stanford MPN  
1068 & healthy donor cohorts (n=120) integrated with that of independently published healthy donors (n=31)  
1069 (Rondina et al., 2020). Colors indicate controls (n=52, yellow): ET (n=24, top, light green), PV (n=33,  
1070 middle, dark green) and MF (n=42, bottom, dark blue). Circles filled or open mark presence or absence of  
1071 ruxolitinib treatment; and size of circles, smaller or larger, indicate presence or absence of *JAK2* mutation.

1072

1073

1074

1075

1076

1077

1078 **Table Descriptions**

1079 **Table S1:** MPN patient characteristics from two time-separated cohorts at the Stanford Cancer Institute.

1080

1081 **Table S2:** List of non-coding genes at significant (FDR<0.05) differential expression in each comparison of  
1082 ET, PV and MF versus healthy controls.

1083

1084 **Table S3:** Overlap of differentially expressed genes between the RUX-treated and the MF patient cohorts.

1085

1086 **Table S4:** Full data for all molecular pathways identified in each of ET, PV and MF patient cohorts.

1087

1088 **Table S5:** Predicted probabilities for each of CTRL, ET, PV and MF using all three Lasso logistic models.

1089

1090

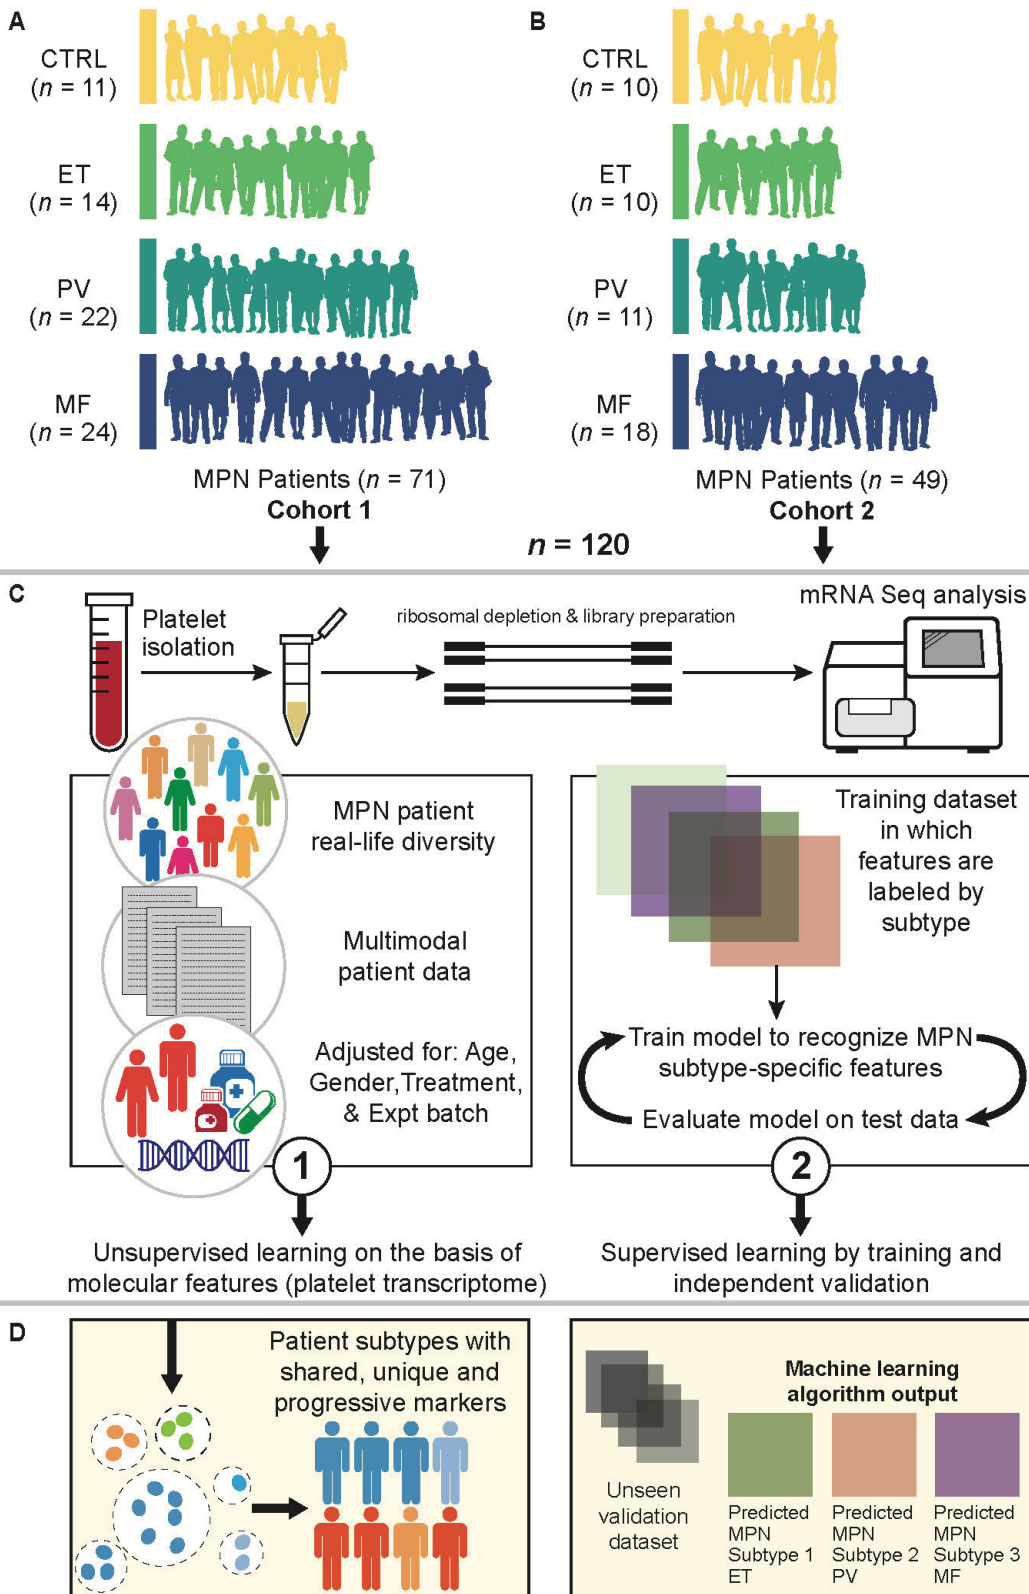

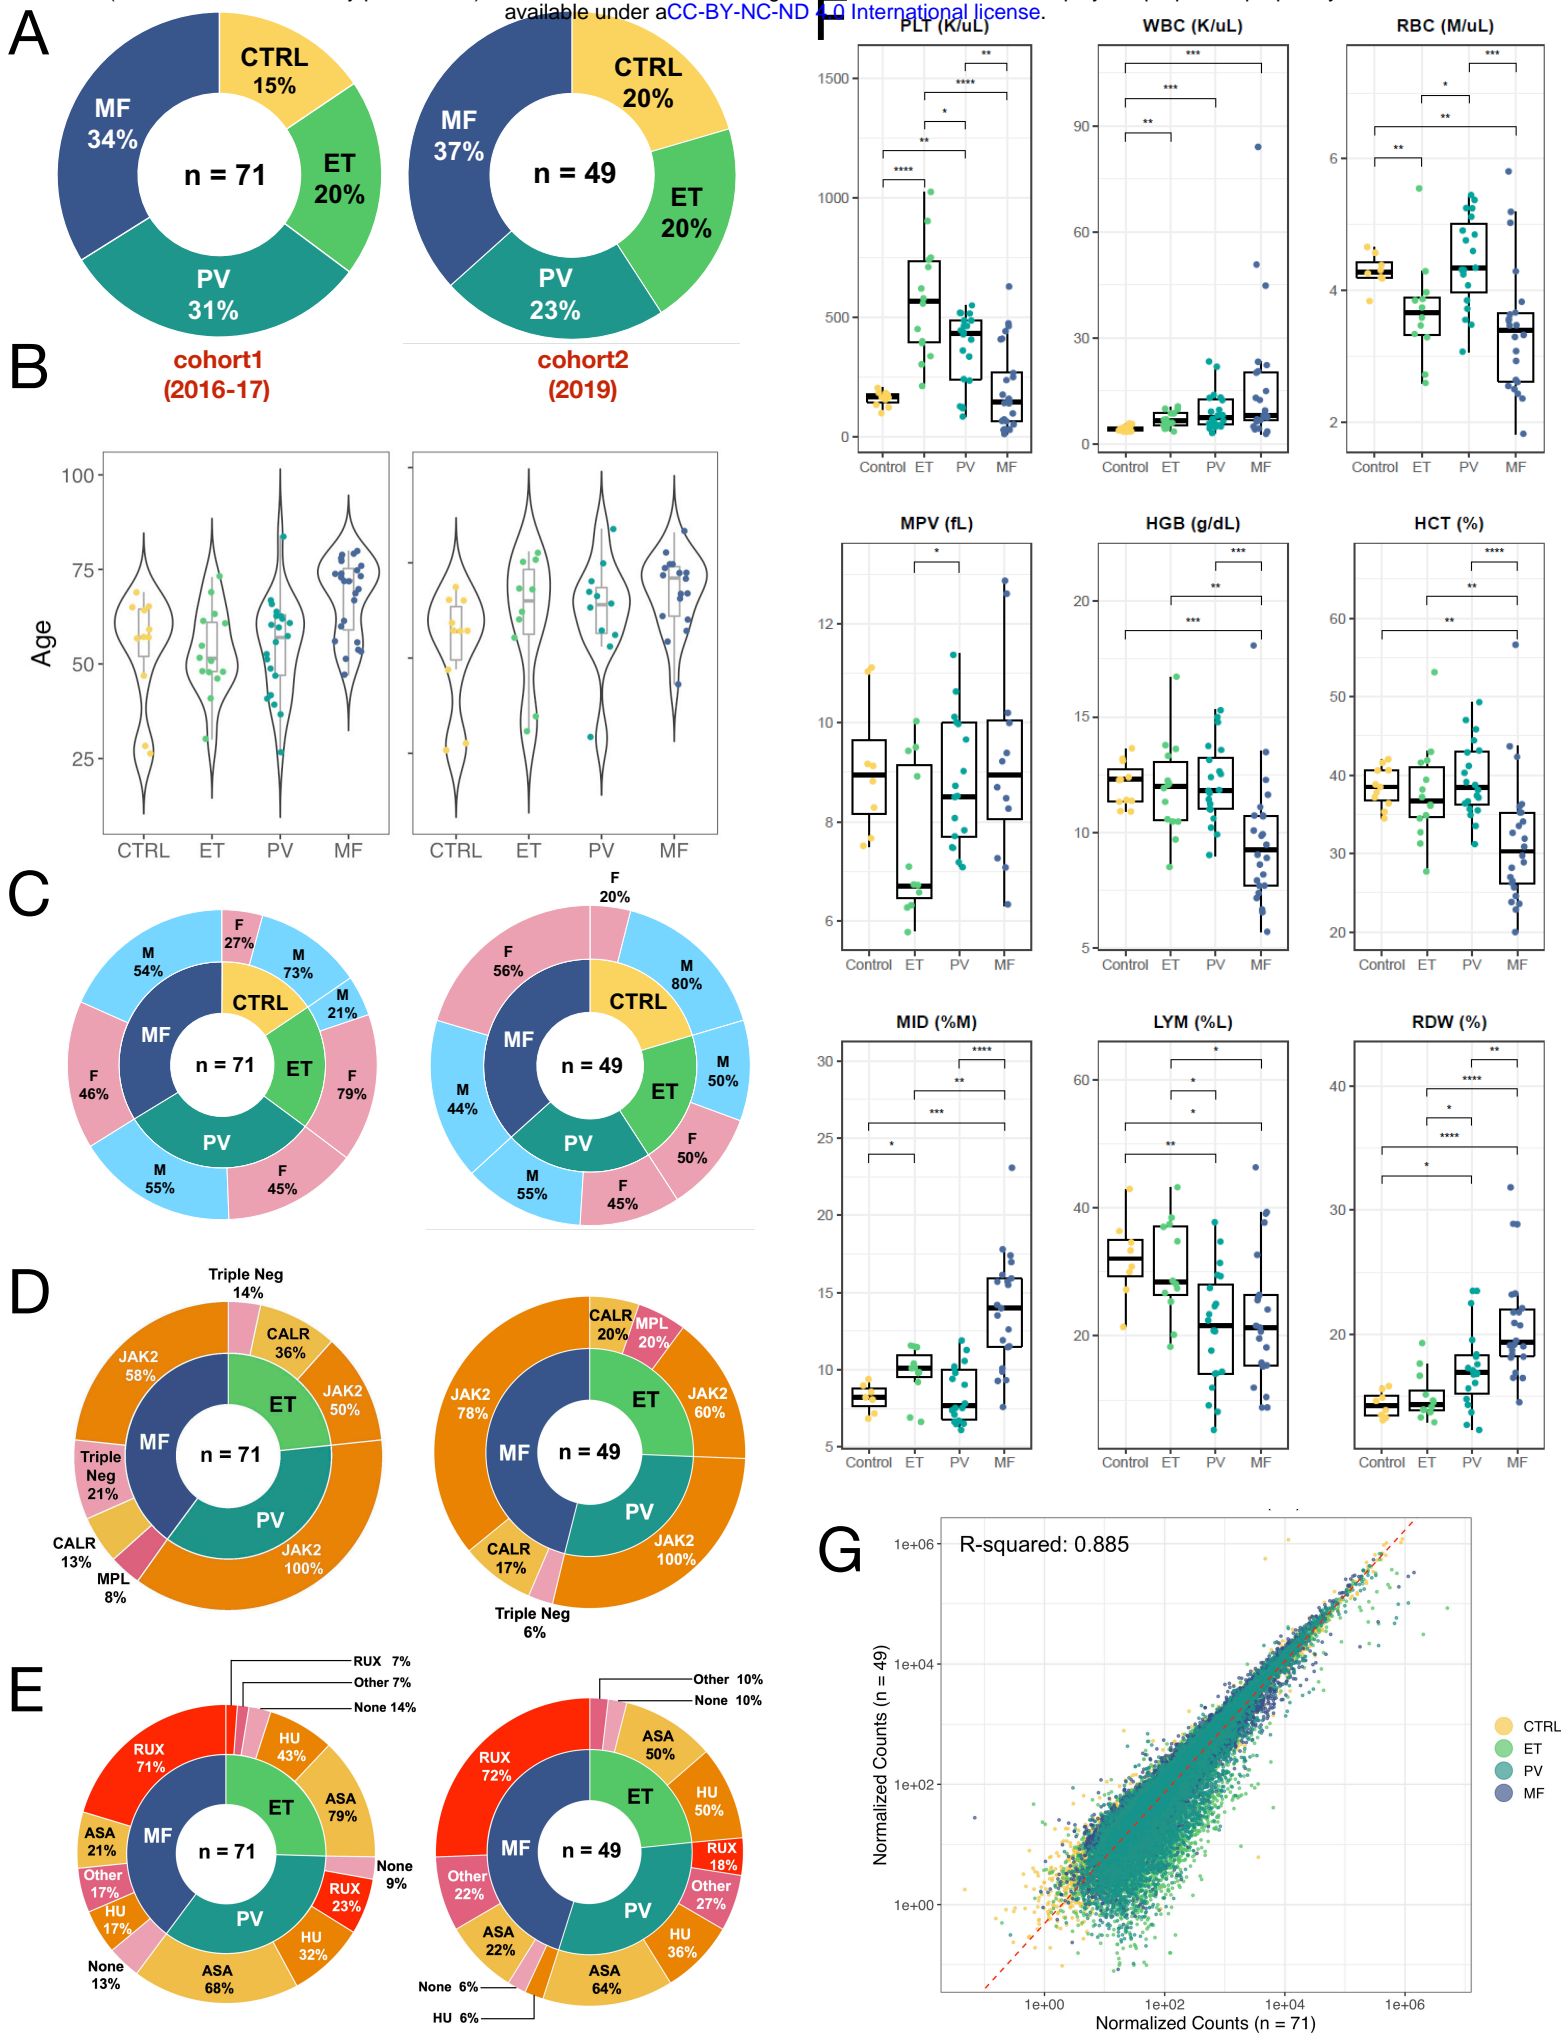

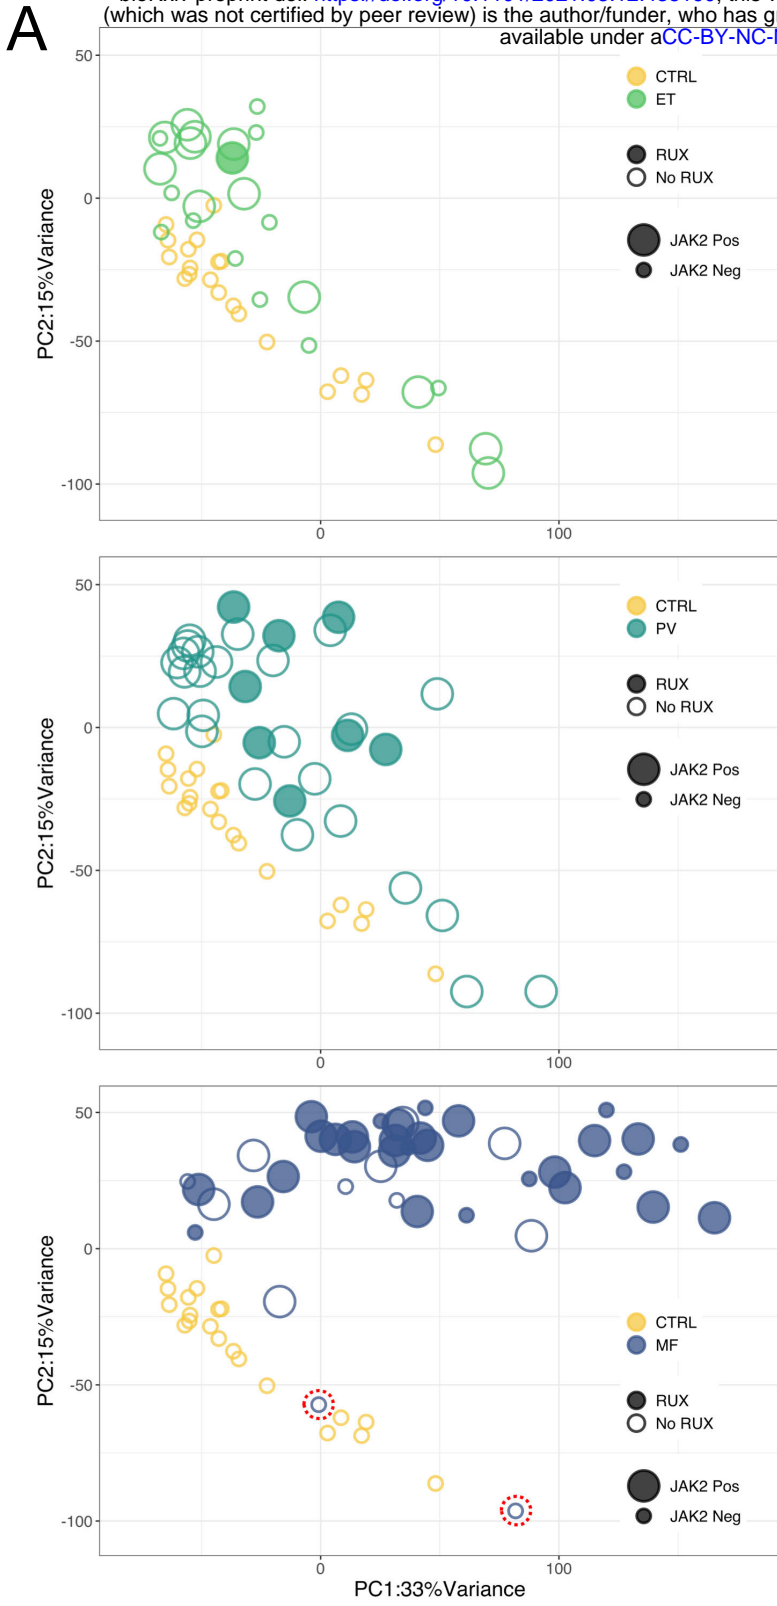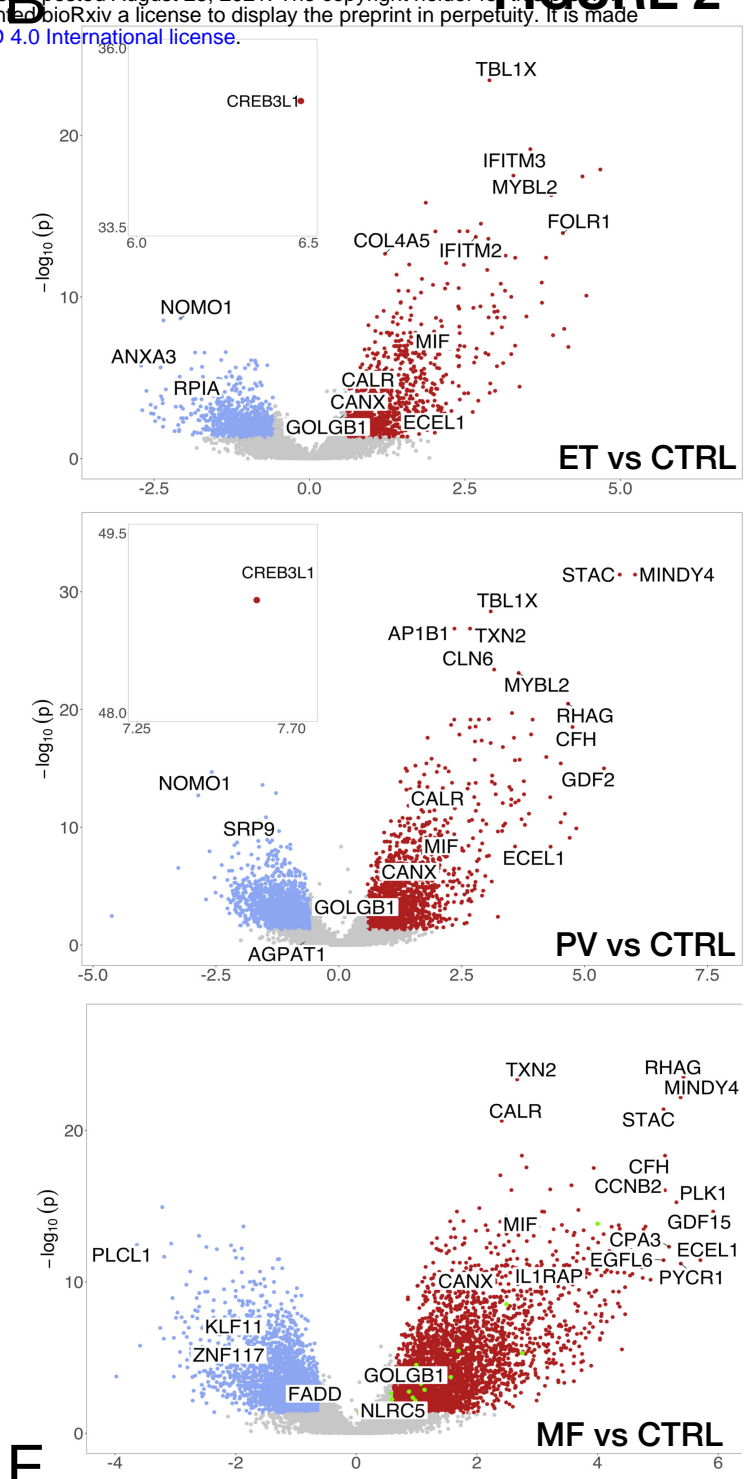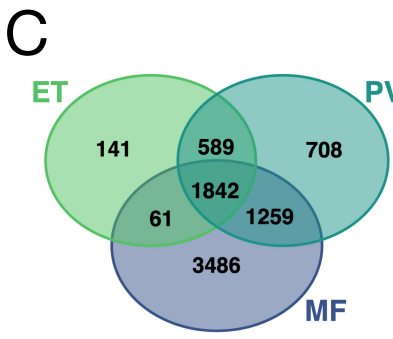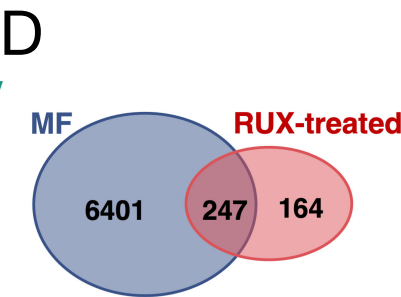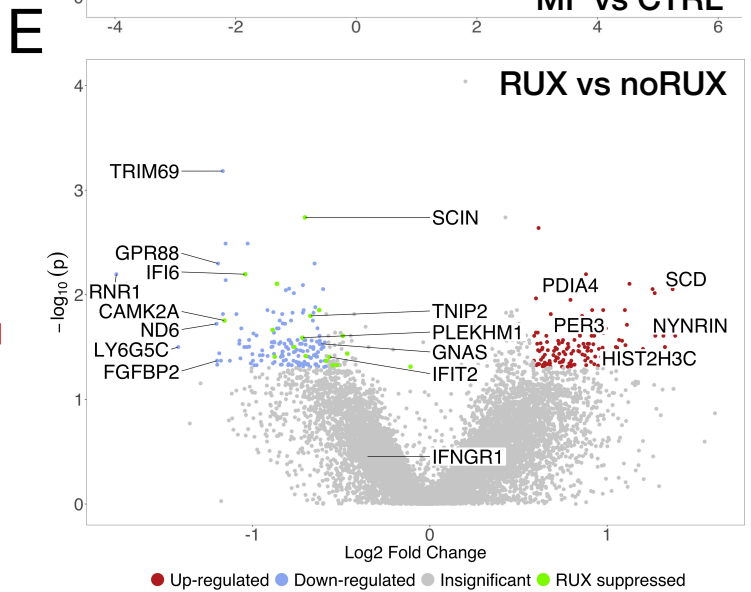

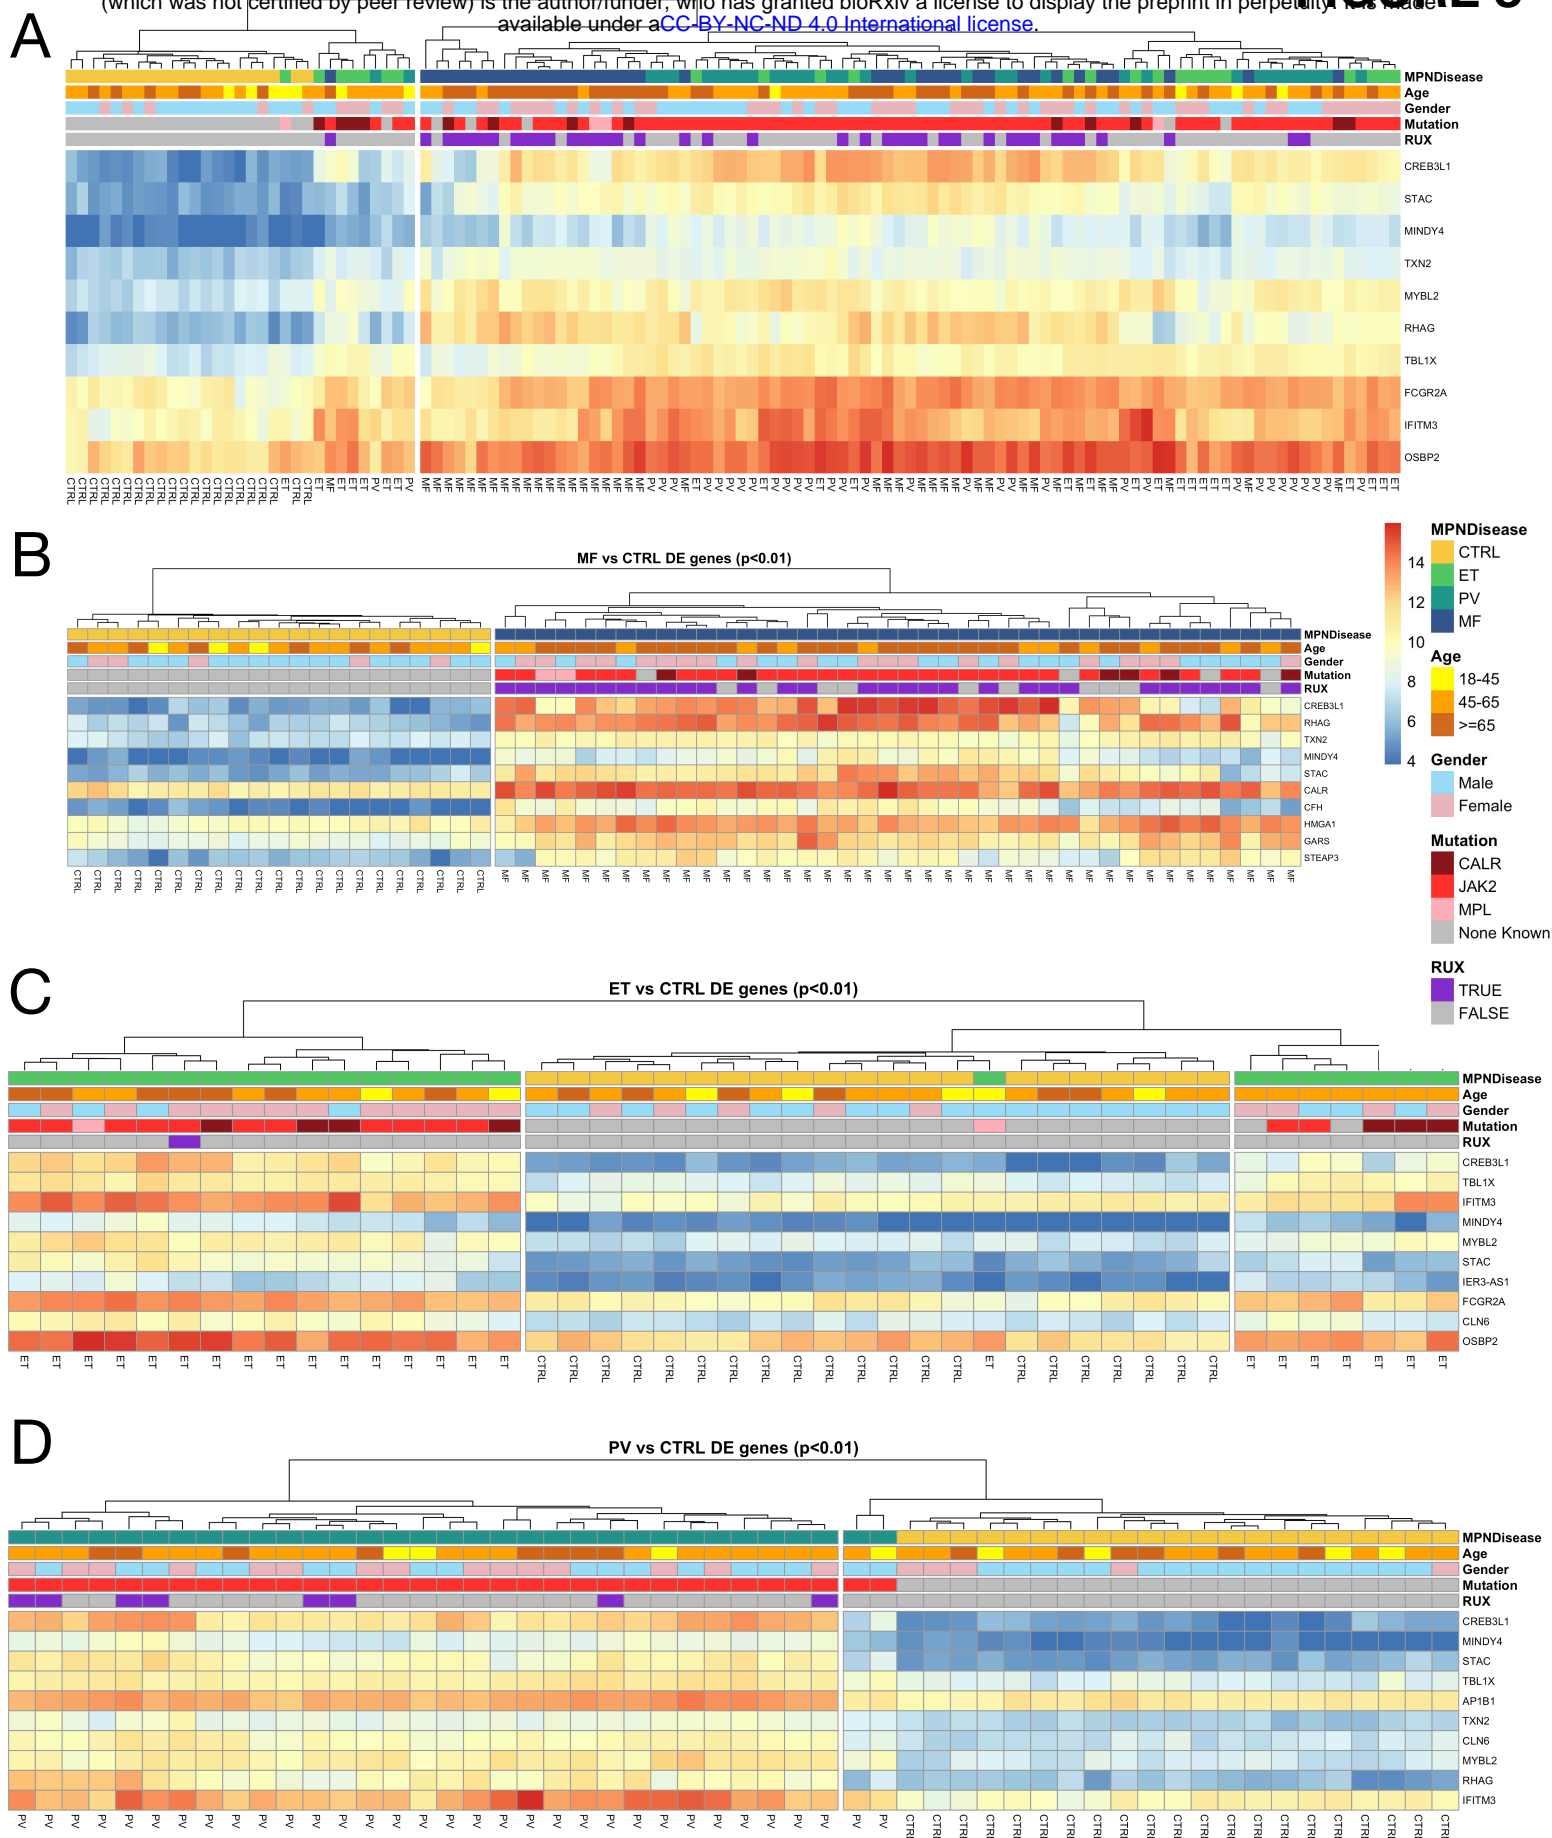



A

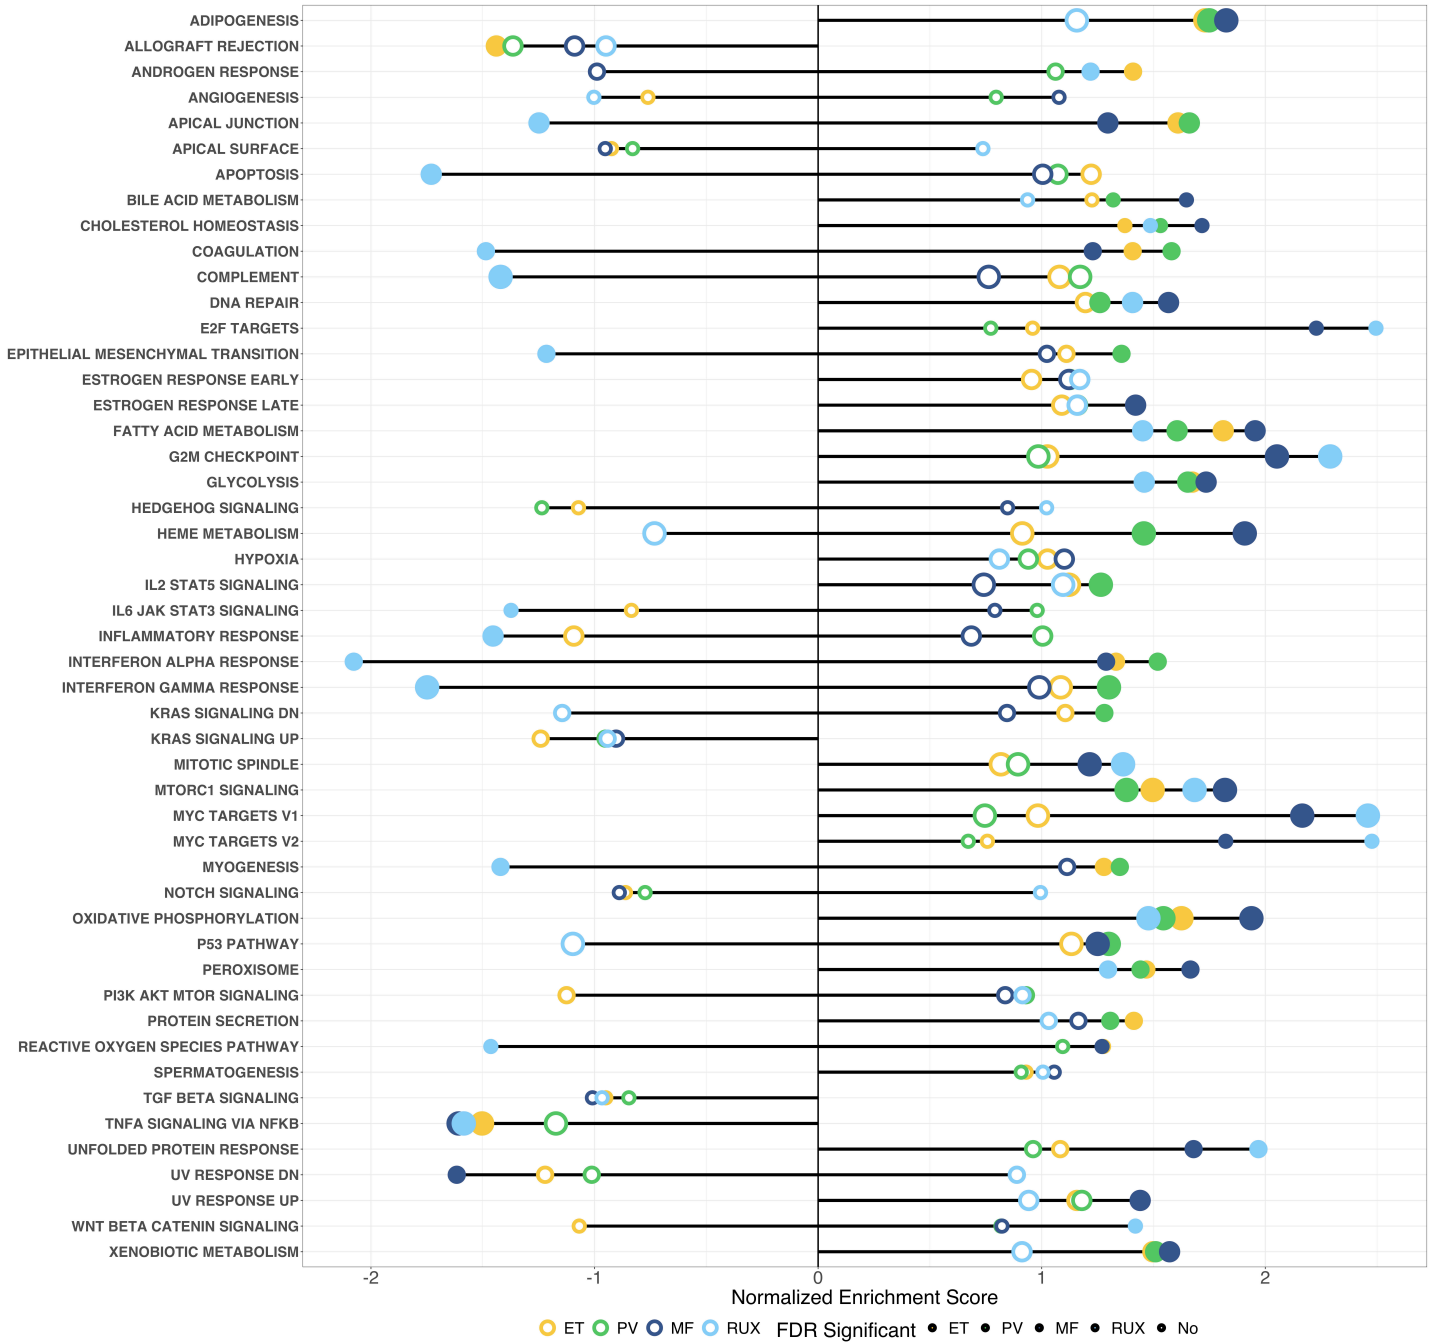

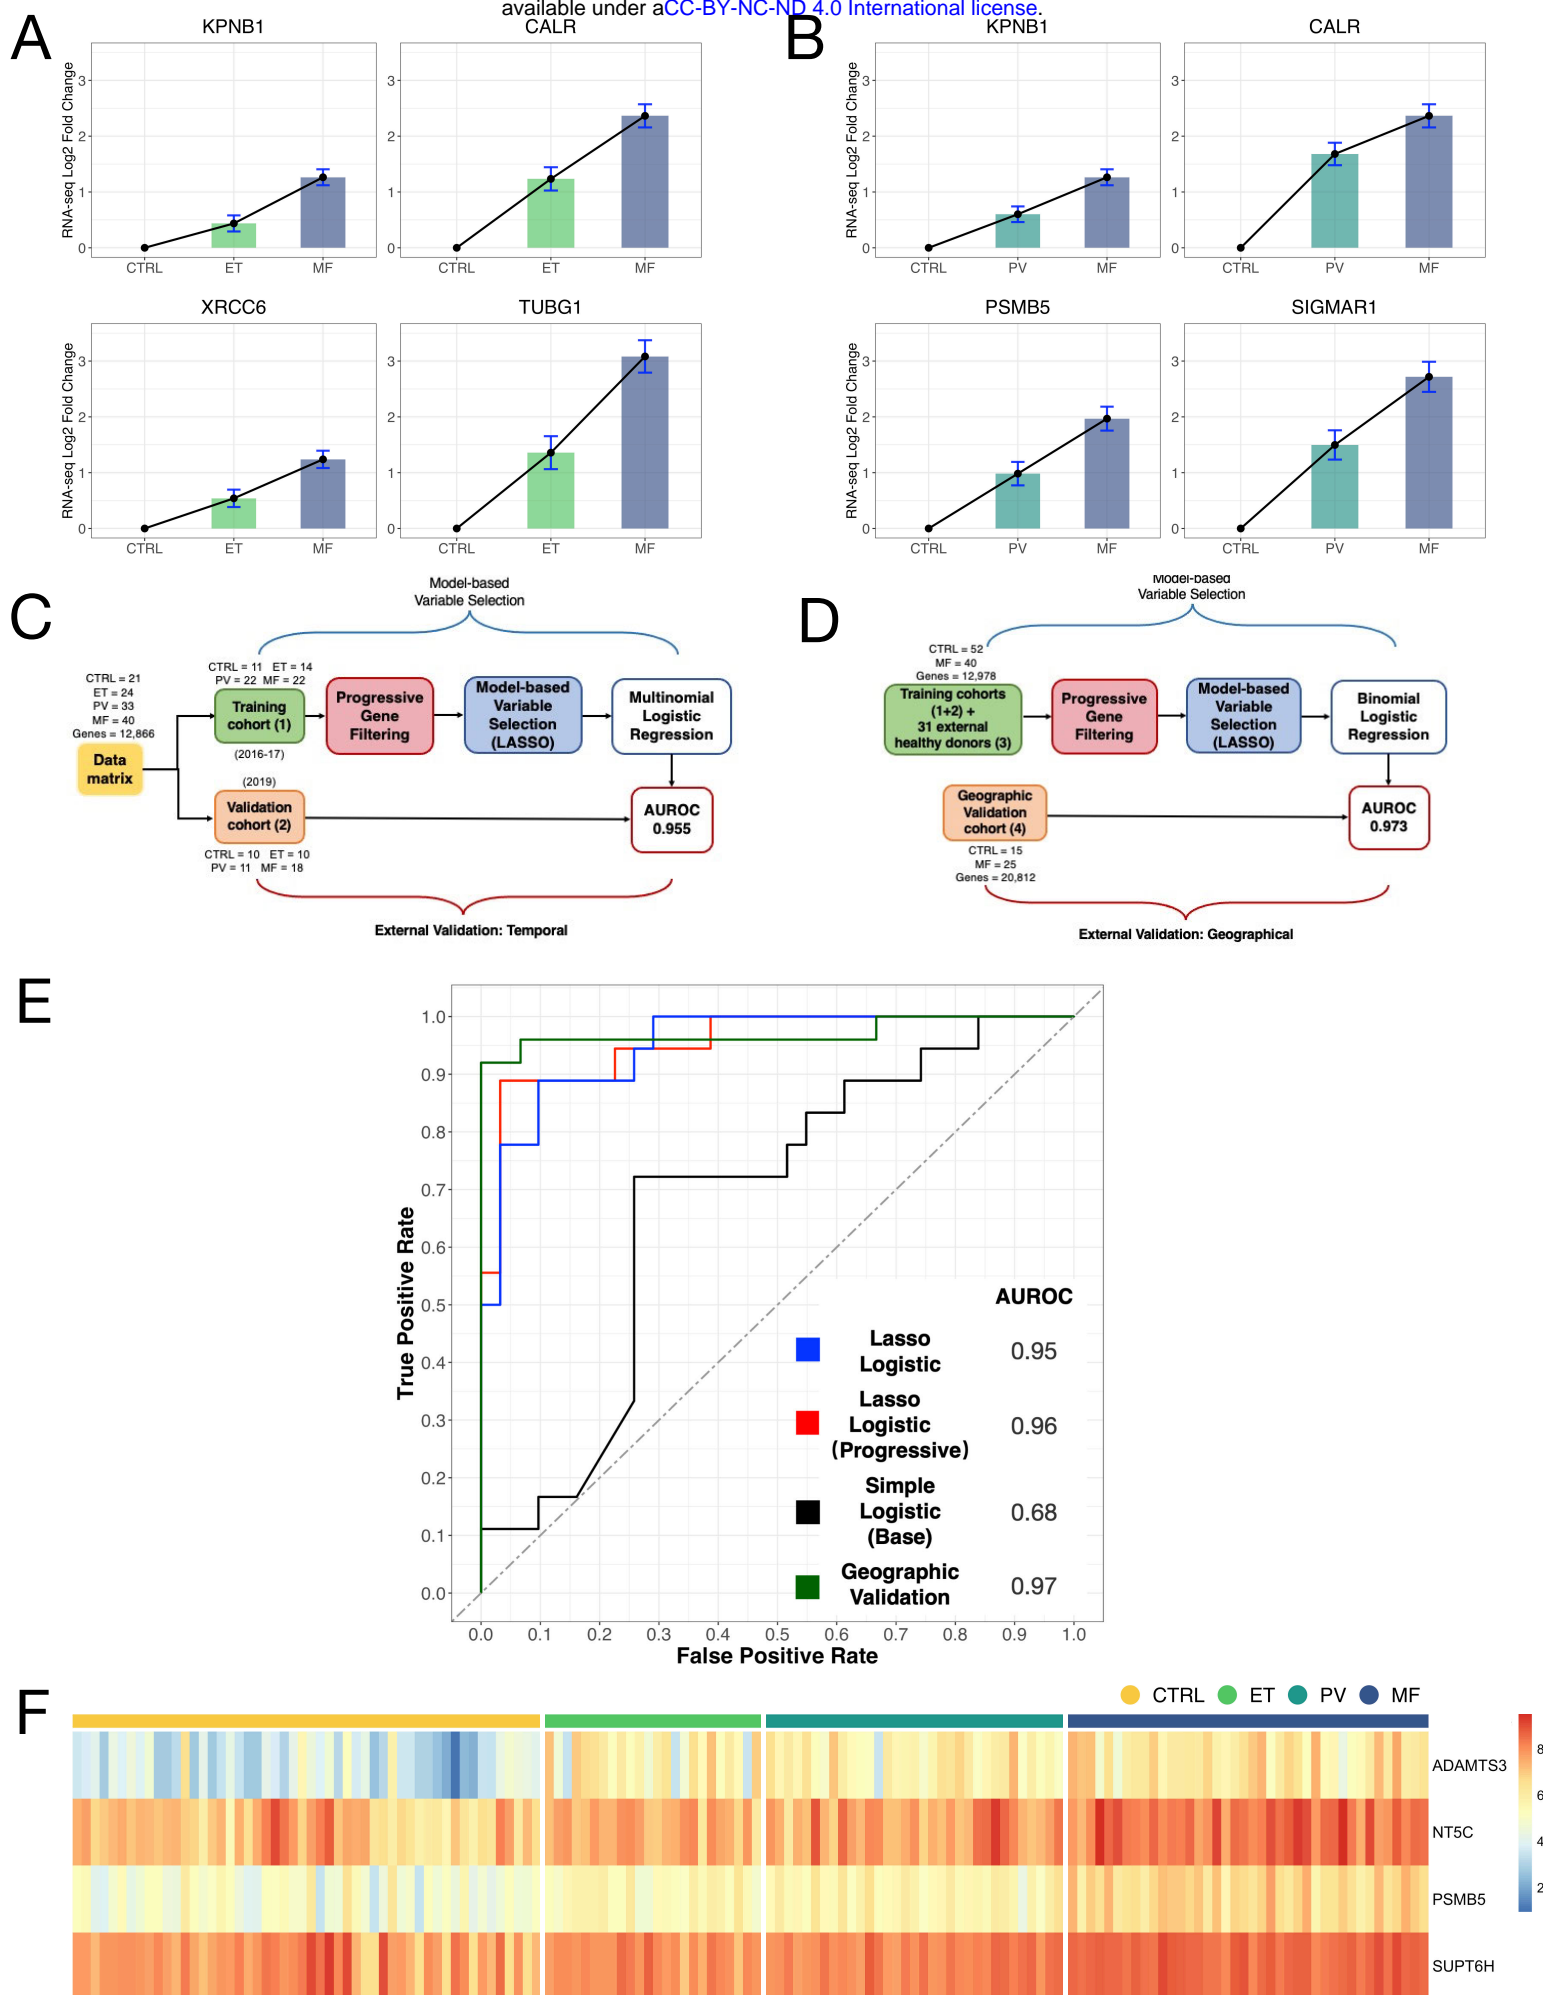

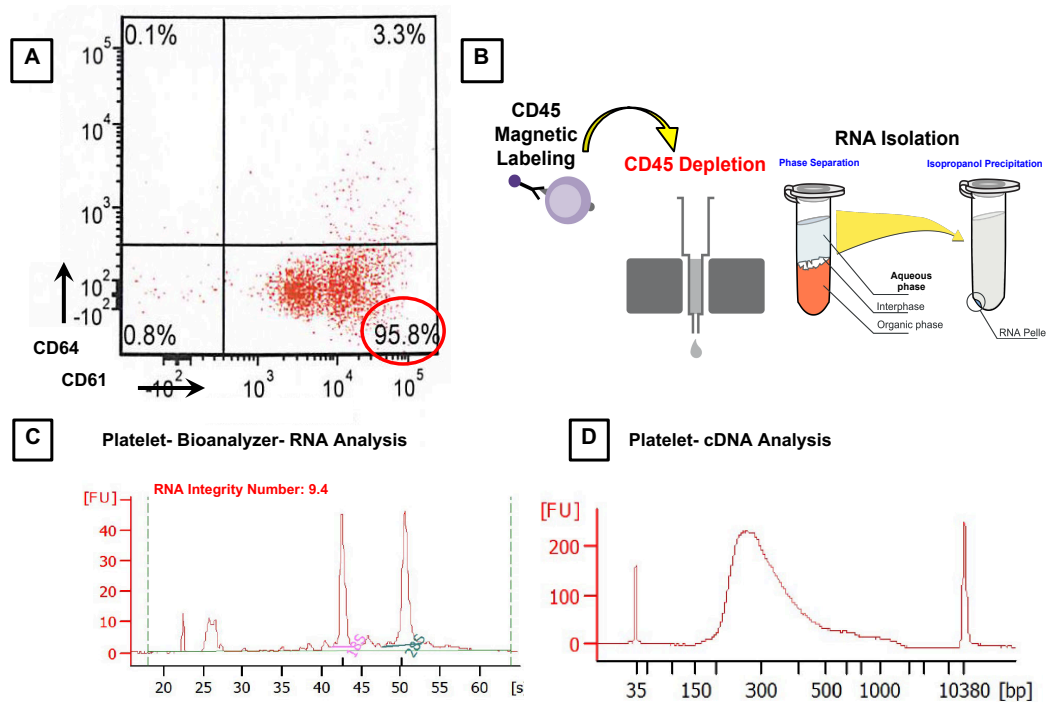

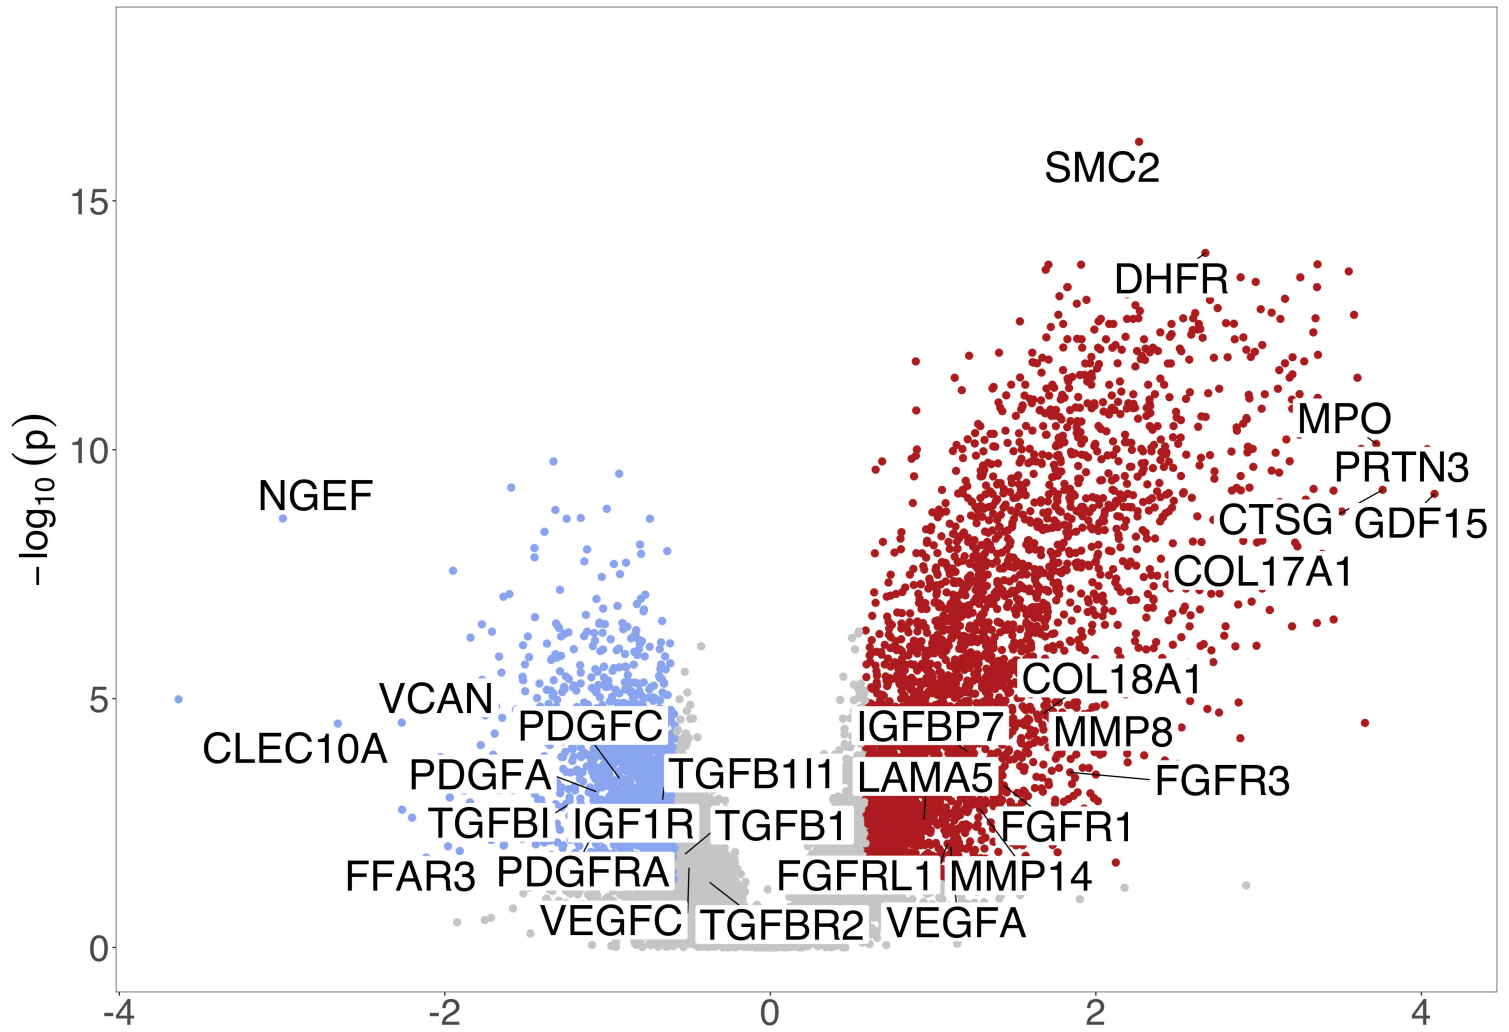

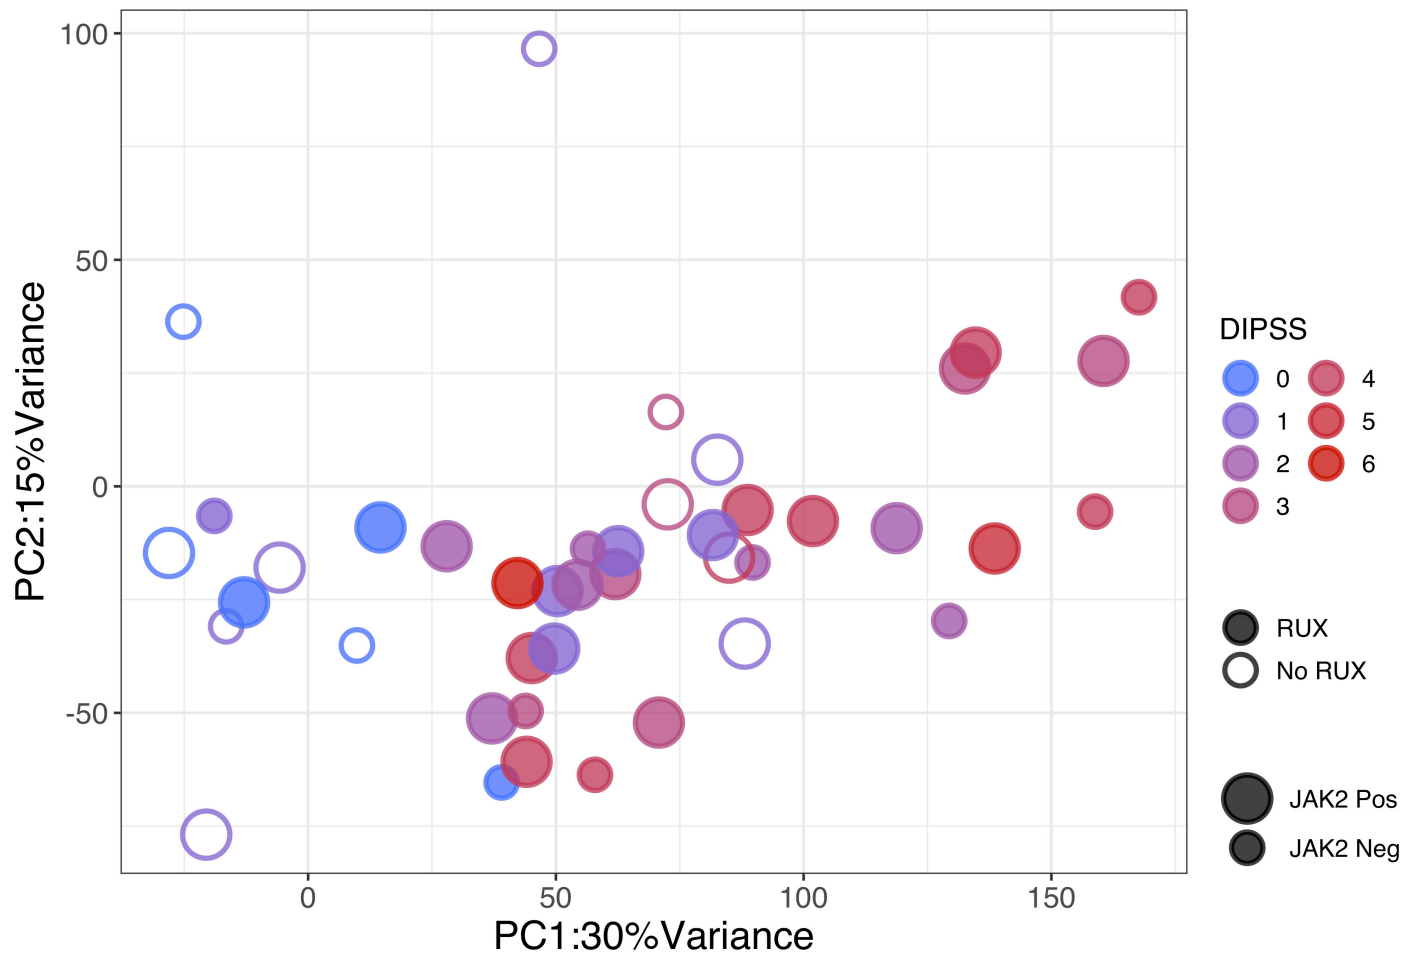

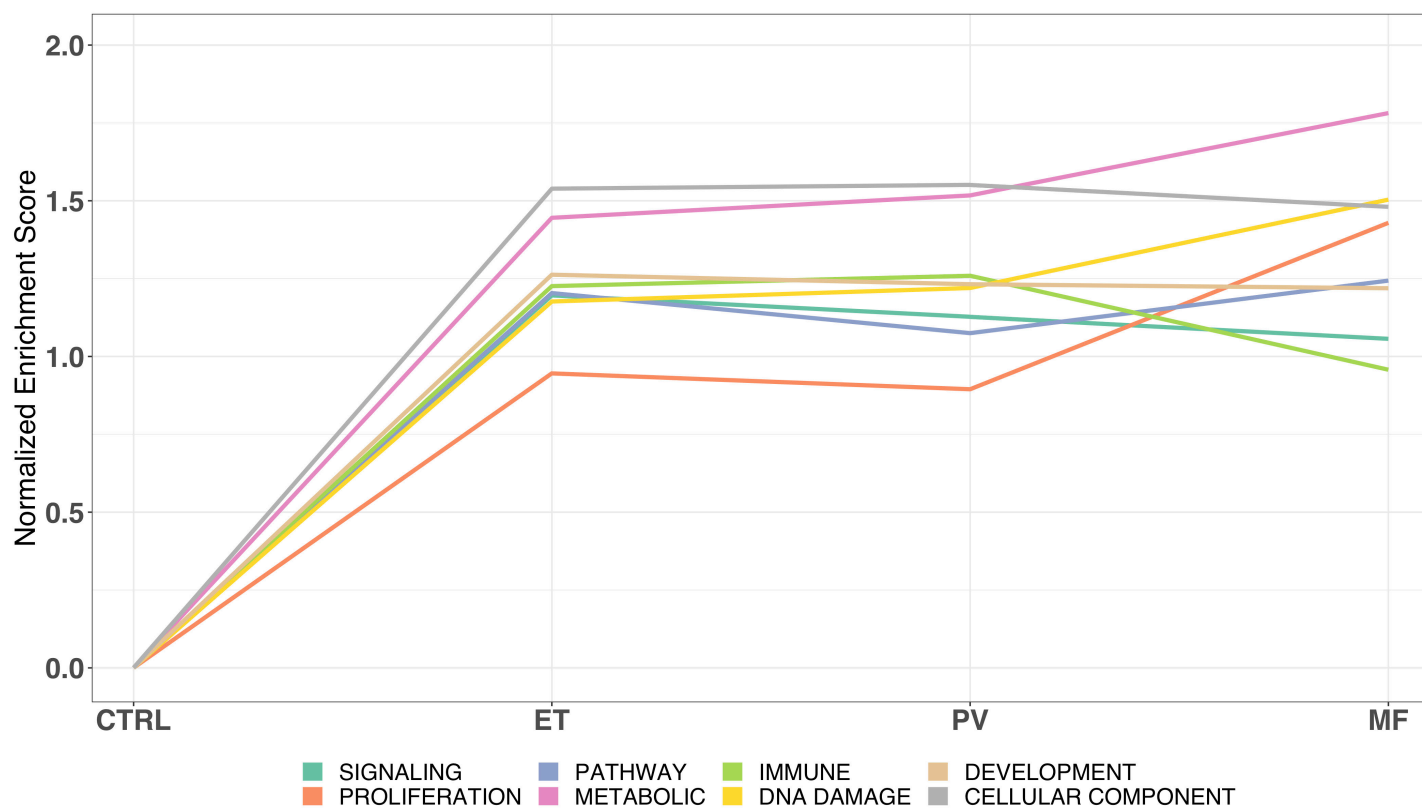

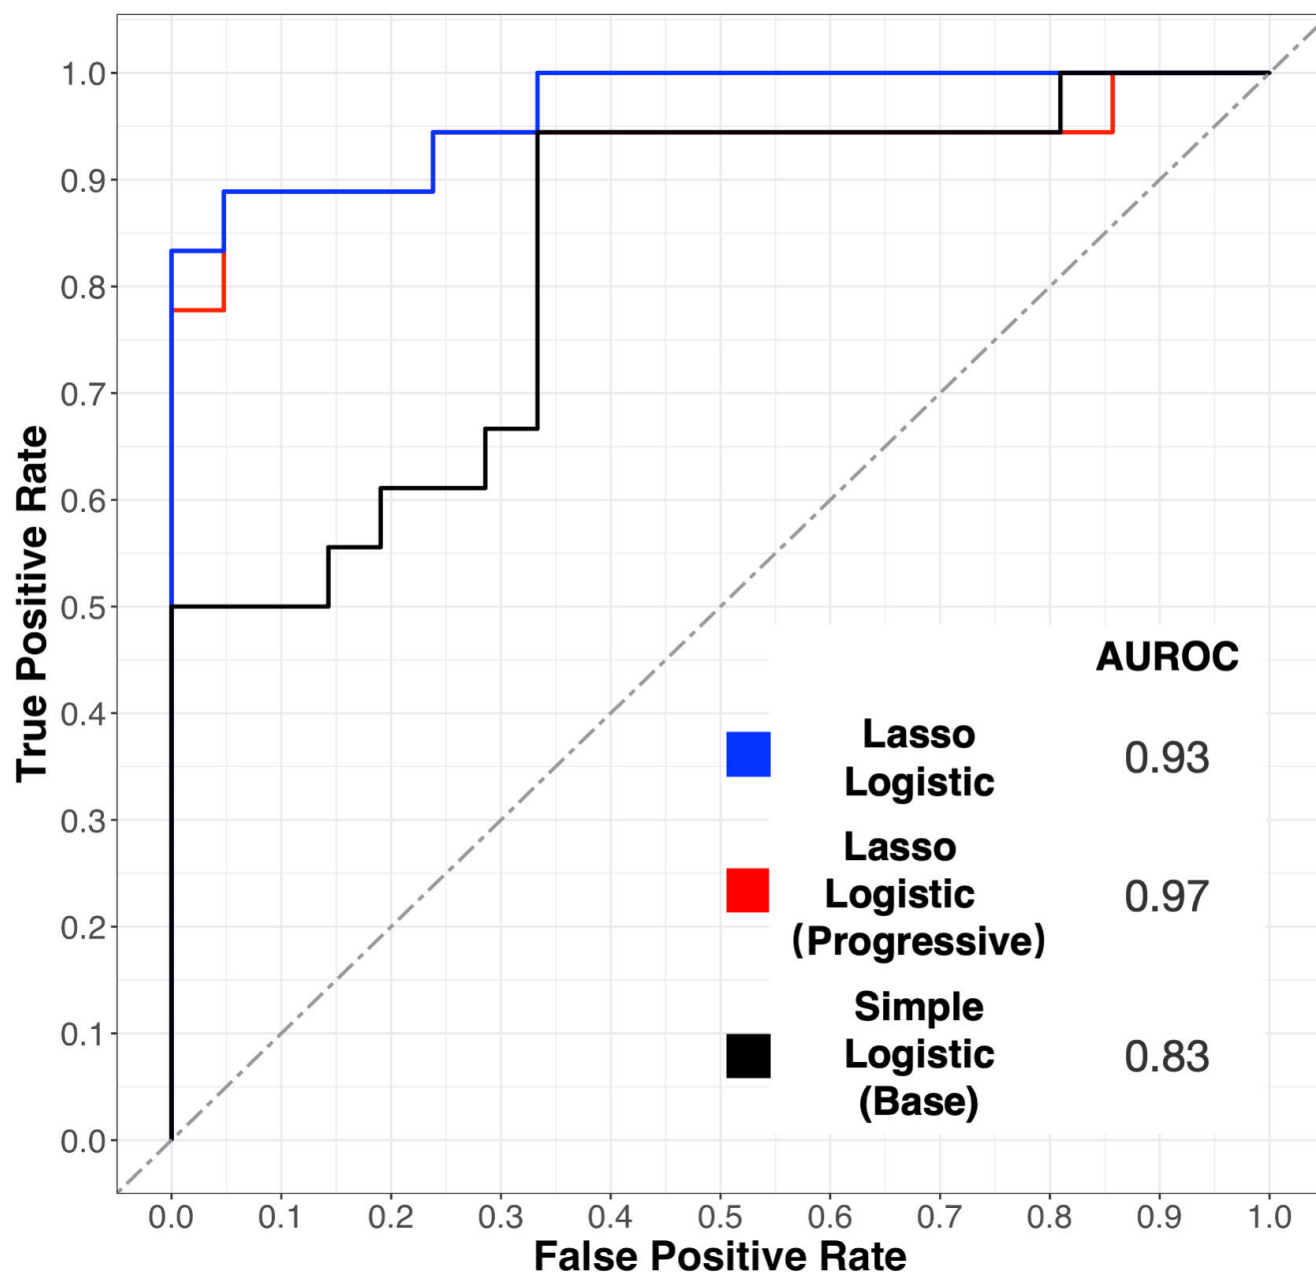

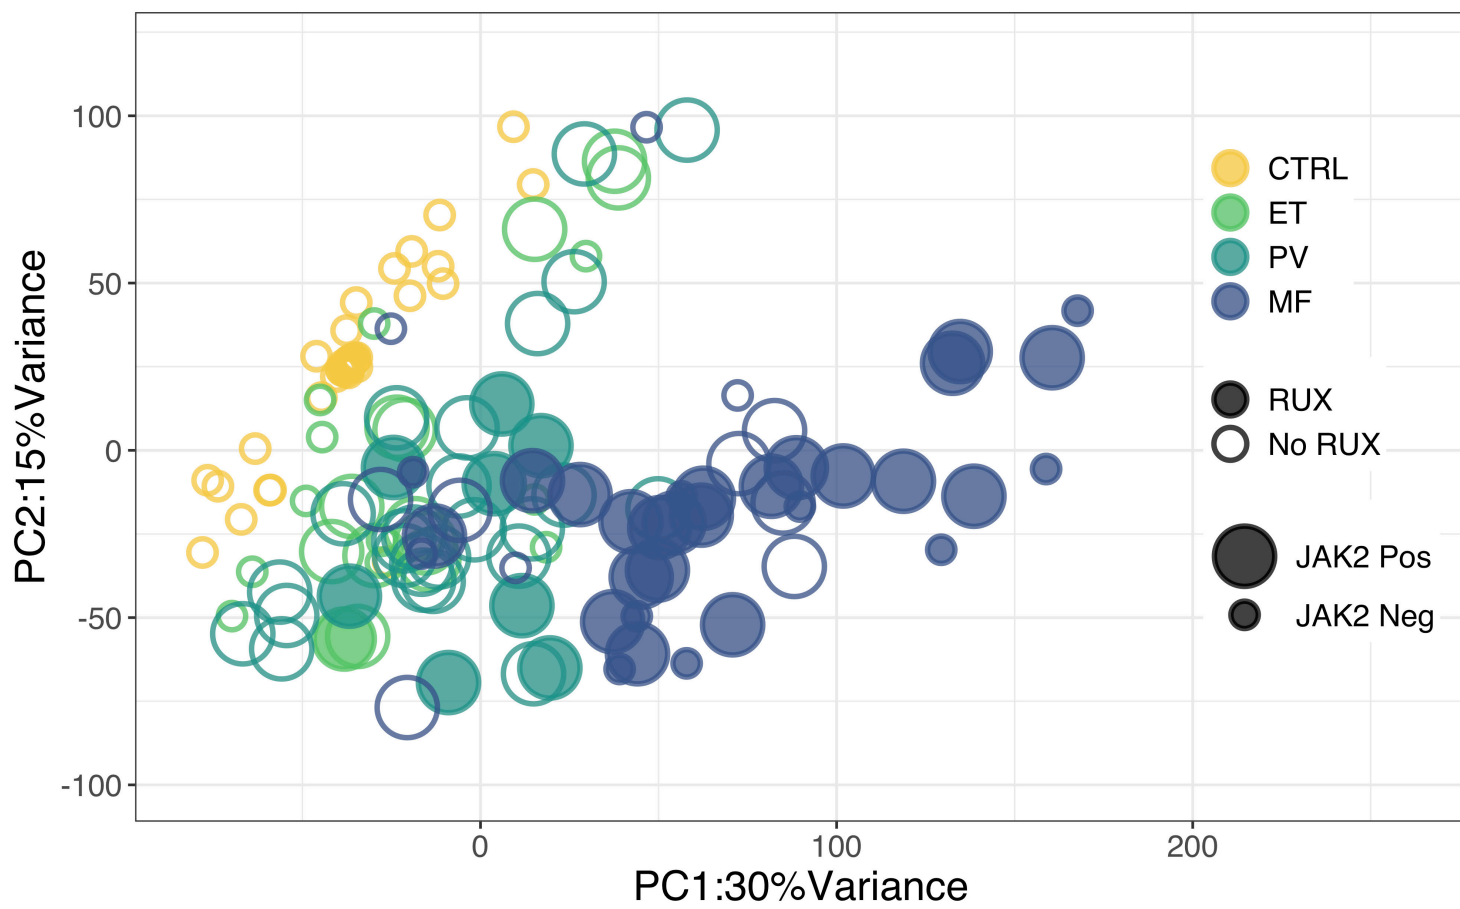



**Table S1A. Characteristics Cohort1**

|                                                                       | ET         | PV         | MF         | Control    | TOTAL      |
|-----------------------------------------------------------------------|------------|------------|------------|------------|------------|
| Subject Count                                                         | n=14       | n=21       | n=24       | n=11       | n=70       |
| Sample Count                                                          | (n=14)     | (n=22)     | (n=24)     | (n=11)     | (n=71)     |
| Median age, y (range)                                                 | 52 (30-73) | 57 (27-84) | 72 (47-80) | 57 (26-69) | 60 (26-84) |
| Male, n (%)                                                           | 3 (21)     | 11 (52)    | 13 (54)    | 8 (73)     | 35 (50)    |
| <b>Race</b>                                                           |            |            |            |            |            |
| Asian                                                                 | 3 (21)     | 1 (5)      | 1 (4)      | 2 (18)     | 7 (10)     |
| Black                                                                 | 0          | 2 (10)     | 0          | 0          | 2 (3)      |
| Native American                                                       | 0          | 0          | 0          | 0          | 0          |
| White                                                                 | 8 (57)     | 11 (52)    | 18 (75)    | 7 (64)     | 44 (63)    |
| Other                                                                 | 2 (14)     | 6 (29)     | 3 (13)     | 2 (18)     | 13 (19)    |
| Unknown                                                               | 1 (7)      | 1 (5)      | 2 (8)      | 0          | 4 (6)      |
| <b>Ethnicity</b>                                                      |            |            |            |            |            |
| Hispanic or Latino                                                    | 0          | 1 (5)      | 2 (8)      | 2 (18)     | 5 (7)      |
| Not Hispanic or Latino                                                | 13 (93)    | 18 (86)    | 21 (88)    | 9 (82)     | 61 (87)    |
| Unknown                                                               | 1 (7)      | 2 (9)      | 1 (4)      | 0          | 4 (6)      |
| <b>MPN Mutation present, n (%)</b>                                    |            |            |            |            |            |
| <i>CALR</i>                                                           | 5 (36)     | 0          | 3 (13)     |            | 8 (11)     |
| <i>JAK2</i>                                                           | 7 (50)     | 21 (100)   | 14 (58)    |            | 42 (60)    |
| <i>MPL</i>                                                            | 0          | 0          | 2 (8)      |            | 2 (3)      |
| Triple negative (no <i>CALR</i> , <i>JAK2</i> or <i>MPL</i> mutation) | 2 (14)     | 0          | 5 (21)     |            | 7 (10)     |
| Mutation status unknown                                               | 0          | 0          | 0 (0)      | 11         | 11 (16)    |
|                                                                       | ET         | PV         | MF         |            | TOTAL      |
|                                                                       | n=14       | n=21       | n=24       |            | n=59       |
| <b>Number of current therapies, n (%)</b>                             |            |            |            |            |            |
| 0                                                                     | 2 (14)     | 2 (10)     | 3 (13)     |            | 18 (26)    |
| 1                                                                     | 5 (36)     | 11 (52)    | 13 (54)    |            | 29 (41)    |
| 2+                                                                    | 7 (50)     | 8 (38)     | 8 (33)     |            | 23 (33)    |
| <b>Type of current therapy*, n (%)</b>                                |            |            |            |            |            |
| Aspirin                                                               | 11 (79)    | 15 (71)    | 5 (21)     |            | 31 (44)    |
| JAK Inhibitor                                                         | 1 (7)      | 5 (24)     | 17 (71)    |            | 23 (33)    |
| Hydroxyurea                                                           | 6 (43)     | 7 (33)     | 4 (17)     |            | 17 (24)    |
| Other**                                                               | 1 (7)      | 1 (7)      | 4 (17)     |            | 6 (8)      |
| None                                                                  | 2 (14)     | 0          | 3 (13)     |            | 5 (7)      |

\*Not mutually exclusive

\*\* 'Other' treatments include Warfarin, PEG interferon, Anagrelide, Luspatercept or Procrit in either cohort

**Table S1B. Characteristics Cohort2**

|                                                                          | ET         | PV         | MF         | Control    | TOTAL      |
|--------------------------------------------------------------------------|------------|------------|------------|------------|------------|
| Subject Count                                                            | n=10       | n=10       | n=16       | n=10       | n=46       |
| Sample Count                                                             | (n=10)     | (n=11)     | (n=18)     | (n=10)     | (n=49)     |
| Median age, y (range)                                                    | 65 (31-78) | 65 (29-84) | 69 (43-83) | 57 (26-69) | 65 (26-84) |
| Male, n (%)                                                              | 5 (50)     | 6 (60)     | 8 (50)     | 8 (80)     | 27 (59)    |
| <b>Race</b>                                                              |            |            |            |            |            |
| Asian                                                                    | 1 (10)     | 1 (10)     | 6 (38)     | 5 (50)     | 13 (28)    |
| Black                                                                    | 0          | 0          | 1 (6)      | 0          | 1 (2)      |
| Native American                                                          | 0          | 0          | 0          | 2 (20)     | 2 (4)      |
| White                                                                    | 8 (80)     | 8 (80)     | 7 (44)     | 2 (20)     | 25 (54)    |
| Other                                                                    | 0          | 1 (10)     | 2 (13)     | 1 (10)     | 4 (9)      |
| Unknown                                                                  | 1 (10)     | 0          | 0          | 0          | 1 (2)      |
| <b>Ethnicity</b>                                                         |            |            |            |            |            |
| Hispanic or Latino                                                       | 0          | 1 (10)     | 1 (6)      | 1 (10)     | 3 (6)      |
| Not Hispanic or Latino                                                   | 9 (90)     | 9 (90)     | 15 (94)    | 9 (90)     | 42 (91)    |
| Unknown                                                                  | 1 (10)     | 0          | 0          | 0          | 1 (2)      |
| <b>MPN Mutation present, n (%)</b>                                       |            |            |            |            |            |
| <i>CALR</i>                                                              | 2 (20)     | 0          | 3 (19)     |            | 5 (11)     |
| <i>JAK2</i>                                                              | 6 (60)     | 10 (100)   | 11 (68)    |            | 27 (59)    |
| <i>MPL</i>                                                               | 2 (20)     | 0          | 0          |            | 2 (4)      |
| Triple negative (no <i>CALR</i> ,<br><i>JAK2</i> or <i>MPL</i> mutation) | 0          | 0          | 2 (13)     |            | 2 (4)      |
| Mutation status unknown                                                  | 0          | 0          | 0          | 10         | 10 (22)    |
|                                                                          | ET         | PV         | MF         |            | TOTAL      |
|                                                                          | n=10       | n=10       | n=16       |            | n=36       |
| <b>Number of current therapies, n (%)</b>                                |            |            |            |            |            |
| 0                                                                        | 1 (10)     | 0          | 1 (6)      |            | 2 (6)      |
| 1                                                                        | 7 (70)     | 6 (60)     | 10 (63)    |            | 23 (64)    |
| 2+                                                                       | 2 (20)     | 4 (40)     | 5 (31)     |            | 11 (31)    |
| <b>Type of current therapy*, n (%)</b>                                   |            |            |            |            |            |
| Aspirin                                                                  | 5 (50)     | 7 (70)     | 4 (25)     |            | 16 (44)    |
| JAK Inhibitor                                                            | 0          | 2 (20)     | 11 (69)    |            | 13 (36)    |
| Hydroxyurea                                                              | 5 (50)     | 4 (40)     | 1 (6)      |            | 10 (28)    |
| Other**                                                                  | 1 (10)     | 2 (20)     | 4 (25)     |            | 7 (19)     |
| None                                                                     | 1 (10)     | 0          | 1 (6)      |            | 2 (6)      |

**TableS2A: Non-coding RNA ET vs CTRL FDR <0.05**

| Gene      | baseMean   | log2FoldChar | lfcSE      | stat       | pvalue     | padj       |
|-----------|------------|--------------|------------|------------|------------|------------|
| C6orf223  | 75.0957846 | 3.01740668   | 0.39682251 | 6.82495279 | 8.80E-12   | 1.89E-09   |
| TREML3P   | 465.150144 | 2.09076139   | 0.32879191 | 5.89156432 | 3.83E-09   | 3.56E-07   |
| PTENP1    | 90.153903  | -1.3414763   | 0.24299574 | -5.2308836 | 1.69E-07   | 9.03E-06   |
| TXLNGY    | 70.2890279 | -1.150555    | 0.58601854 | -5.1656862 | 2.40E-07   | 1.21E-05   |
| WASIR2    | 43.3167126 | 2.40131956   | 0.41838737 | 4.93956149 | 7.83E-07   | 3.24E-05   |
| LINC00926 | 49.189988  | -0.8460768   | 0.51299087 | -4.9383514 | 7.88E-07   | 3.25E-05   |
| GSTT2     | 12.2152526 | 2.55343922   | 0.56455669 | 4.69096864 | 2.72E-06   | 8.92E-05   |
| C15orf54  | 1110.16259 | -2.0410416   | 0.3592438  | -4.6843096 | 2.81E-06   | 9.20E-05   |
| HHLA3     | 37.3416835 | 1.20795875   | 0.25156831 | 4.50879144 | 6.52E-06   | 0.00018558 |
| LINC00888 | 45.0286505 | 1.49897176   | 0.32604995 | 4.35281255 | 1.34E-05   | 0.0003319  |
| PRKY      | 36.6660387 | -1.3818357   | 0.56903696 | -4.3422151 | 1.41E-05   | 0.00034309 |
| STAG3L4   | 72.7622771 | 0.92848143   | 0.20317944 | 4.33567135 | 1.45E-05   | 0.00035144 |
| APTR      | 16.6293968 | 1.44901666   | 0.28977528 | 4.30802291 | 1.65E-05   | 0.00039174 |
| SNHG11    | 223.496342 | 1.2259314    | 0.26232414 | 4.27792252 | 1.89E-05   | 0.00043732 |
| LINC02324 | 150.716456 | 2.06322552   | 0.40319397 | 4.21767817 | 2.47E-05   | 0.00055134 |
| ZNF542P   | 1859.97136 | -1.6557883   | 0.33591721 | -4.156471  | 3.23E-05   | 0.00067835 |
| LINC01816 | 21.3715116 | 1.3807136    | 0.29931732 | 4.09022598 | 4.31E-05   | 0.0008491  |
| CATSPER2P | 57.1797883 | 0.9437991    | 0.22974592 | 3.99439539 | 6.49E-05   | 0.00116548 |
| MT1L      | 22.0458816 | 1.35090139   | 0.42718061 | 3.93530705 | 8.31E-05   | 0.00142349 |
| LINC00667 | 124.738641 | -0.8112539   | 0.19697244 | -3.9224974 | 8.76E-05   | 0.00147775 |
| CRYZL2P   | 258.679365 | 0.9859327    | 0.24756806 | 3.87823669 | 0.00010522 | 0.00170493 |
| SNHG20    | 1252.2434  | 1.2819875    | 0.30780752 | 3.86610294 | 0.00011059 | 0.00177189 |
| MIR663AHG | 47.2413146 | -1.3000552   | 0.49967854 | -3.7753047 | 0.00015981 | 0.00231027 |
| LINC01686 | 30.4591717 | -1.272036    | 0.2827493  | -3.712935  | 0.00020487 | 0.00280708 |
| DANCR     | 129.858339 | 1.26433721   | 0.28617305 | 3.70619362 | 0.0002104  | 0.00287308 |
| XIST      | 477.026751 | 0.402829     | 0.60233484 | -3.6774546 | 0.00023557 | 0.0031214  |
| TRPC2     | 270.438119 | 1.07771801   | 0.30611814 | 3.65984563 | 0.00025237 | 0.00328639 |
| MALAT1    | 20950.7202 | -1.0068962   | 0.29864363 | -3.6554008 | 0.00025678 | 0.00332703 |
| SCARNA7   | 64.2222264 | -1.295771    | 0.44242288 | -3.6494433 | 0.00026281 | 0.00338469 |
| LINC00642 | 12.3262931 | -1.5927968   | 0.40141176 | -3.6265377 | 0.00028725 | 0.00362325 |
| CA5BP1    | 74.5936639 | 0.80044947   | 0.20835618 | 3.59252265 | 0.00032749 | 0.0039638  |
| CLUHP3    | 13.3693335 | -1.7876459   | 0.53150826 | -3.5820634 | 0.00034089 | 0.00407612 |
| LINC01137 | 100.470031 | -1.1064498   | 0.27397923 | -3.5463582 | 0.0003906  | 0.00456854 |
| LINC02397 | 8.39863836 | -0.4896785   | 0.52319022 | -3.5155152 | 0.0004389  | 0.00491624 |
| MAP3K14   | 32.5368126 | -1.0545683   | 0.35999171 | -3.4896245 | 0.0004837  | 0.00527618 |
| LINC00665 | 11.3426597 | -1.1114831   | 0.34125107 | -3.4647271 | 0.00053077 | 0.00563905 |
| DANT2     | 19.2328865 | 1.30273456   | 0.40333808 | 3.46491806 | 0.00053039 | 0.00563905 |
| BCYRN1    | 65.7484022 | 0.98090182   | 0.2570155  | 3.44071329 | 0.00058018 | 0.00602874 |
| GVINP1    | 109.956496 | -1.0567755   | 0.33540489 | -3.3952595 | 0.00068564 | 0.0069025  |
| LINC00847 | 59.7405718 | -0.6915249   | 0.18909998 | -3.3837347 | 0.00071507 | 0.00713186 |
| ANKRD18DP | 27.8528501 | -1.242929    | 0.3179281  | -3.2793234 | 0.00104056 | 0.00938842 |
| MRPS31P5  | 21.5300564 | -0.8834363   | 0.28268472 | -3.262172  | 0.00110562 | 0.00984423 |
| STAG3L5P  | 23.7187195 | -1.1991666   | 0.38147882 | -3.2496866 | 0.00115532 | 0.01015576 |
| SNHG17    | 97.5070658 | 0.71664689   | 0.20435316 | 3.22397972 | 0.00126422 | 0.01076833 |
| MIR22HG   | 220.562225 | 0.85378561   | 0.25582948 | 3.21620071 | 0.001299   | 0.01100373 |
| RRP7BP    | 18.7179955 | -0.8557298   | 0.41881081 | -3.1437826 | 0.00166779 | 0.01319669 |
| SCARNA10  | 386.403772 | -1.1667638   | 0.48238085 | -3.1418756 | 0.00167869 | 0.01326663 |
| LINC01128 | 87.4916407 | -1.2902006   | 0.35116866 | -3.1249391 | 0.00177842 | 0.01387577 |
| H19       | 313.096933 | -1.4106261   | 0.40469355 | -3.0841625 | 0.00204126 | 0.01543059 |
| ZNF767P   | 78.9102273 | -0.6771986   | 0.21151393 | -3.0634223 | 0.00218821 | 0.01627244 |
| HERC2P9   | 578.492242 | 0.6527631    | 0.20593559 | 3.05601307 | 0.00224302 | 0.01657589 |
| SCARNA5   | 74.3397954 | -0.7742817   | 0.51523561 | -3.0345135 | 0.00240924 | 0.01748753 |
| LINC02035 | 11.7211718 | -1.2695788   | 0.49286829 | -3.0326511 | 0.00242416 | 0.01755161 |
| SNHG7     | 251.166361 | 0.69348644   | 0.21685007 | 3.0289978  | 0.00245367 | 0.01766584 |
| DLEU2     | 235.773583 | -0.7535201   | 0.2241744  | -3.0166561 | 0.0025558  | 0.01823786 |
| GOLGA6L17 | 55.5492253 | 1.06601878   | 0.33402009 | 2.95993916 | 0.003077   | 0.02085809 |
| FAM86C2P  | 18.425204  | -1.0645685   | 0.29991799 | -2.9411981 | 0.00326945 | 0.02172768 |
| NEAT1     | 9909.64484 | 0.7001828    | 0.25633566 | 2.90839679 | 0.00363287 | 0.02330036 |
| SCARNA6   | 22.7104976 | -0.7153145   | 0.53288452 | -2.9014381 | 0.00371454 | 0.0236986  |
| ZNF702P   | 21.8809927 | -0.8420264   | 0.27417687 | -2.8990126 | 0.0037434  | 0.02381927 |
| LINC00861 | 46.3183483 | -1.0949497   | 0.5138199  | -2.8733688 | 0.0040612  | 0.02523712 |
| FIRRE     | 37.6610274 | 1.02952133   | 0.31430573 | 2.85820879 | 0.0042604  | 0.02604005 |
| ADCY10P1  | 11.6649385 | 0.92403279   | 0.31285727 | 2.81794766 | 0.00483317 | 0.02840688 |
| MIR3142HG | 70.9205333 | -0.997961    | 0.32252358 | -2.7559206 | 0.00585272 | 0.03275385 |
| TMEM198B  | 72.6128627 | 0.6382592    | 0.22147004 | 2.75136171 | 0.00593481 | 0.03308372 |
| SNORD17   | 131.067946 | -0.667343    | 0.46677813 | -2.7442571 | 0.0060648  | 0.03367705 |
| MHENC     | 16.7707593 | -0.6273489   | 0.2707653  | -2.7211937 | 0.00650466 | 0.03561234 |
| LINC00649 | 34.8121712 | -0.8196205   | 0.31894703 | -2.7171589 | 0.0065845  | 0.03591189 |
| LINC00507 | 12.8647012 | -0.937725    | 0.3151483  | -2.6796713 | 0.00736945 | 0.03913138 |
| DUXAP10   | 88.9531782 | 1.50094331   | 0.43338865 | 2.65319513 | 0.00797338 | 0.04158308 |
| LINC00939 | 10.5088034 | -1.3030862   | 0.45072083 | -2.6300681 | 0.00853678 | 0.04367164 |
| LINC01534 | 25.7796284 | -0.8038282   | 0.27676242 | -2.6119351 | 0.00900314 | 0.04540276 |
| HRAT92    | 1485.80332 | -1.0832085   | 0.34066179 | -2.6074679 | 0.00912146 | 0.04577096 |
| MYOSLID   | 87.8957944 | -1.1170454   | 0.31880485 | -2.5758862 | 0.00999835 | 0.04870838 |
| MINCR     | 13.2401831 | 0.86586544   | 0.36167785 | 2.57431683 | 0.01004383 | 0.04887438 |

**TableS2B: Non-coding RNA PV vs CTRL FDR <0.05**

| NonCoding  | baseMean   | log2FoldChar | lfcSE      | stat       | pvalue     | padj       |
|------------|------------|--------------|------------|------------|------------|------------|
| C6orf223   | 75.0957846 | 3.50457905   | 0.37516835 | 7.74424677 | 9.62E-15   | 1.32E-12   |
| TREM3L3P   | 465.150144 | 2.22703835   | 0.31177084 | 6.33483255 | 2.38E-10   | 1.24E-08   |
| LINC00888  | 45.0286505 | 2.13237434   | 0.30857425 | 6.23805196 | 4.43E-10   | 2.18E-08   |
| SNHG11     | 223.496342 | 1.6816479    | 0.25099007 | 5.96409366 | 2.46E-09   | 9.86E-08   |
| PTENP1     | 90.153903  | -1.4831523   | 0.23303634 | -5.8924654 | 3.80E-09   | 1.43E-07   |
| LINC02324  | 150.716456 | 2.81469222   | 0.38051391 | 5.65878374 | 1.52E-08   | 4.85E-07   |
| DLU2       | 235.773583 | -1.3397294   | 0.21600145 | -5.4394386 | 5.34E-08   | 1.45E-06   |
| LINC00926  | 49.189988  | -1.3962078   | 0.48804234 | -5.1800064 | 2.22E-07   | 5.06E-06   |
| XIST       | 477.026751 | -0.3947063   | 0.58284501 | -5.1332665 | 2.85E-07   | 6.27E-06   |
| GSTT2      | 12.2152526 | 2.76495054   | 0.53909957 | 5.05602905 | 4.28E-07   | 8.81E-06   |
| C15orf54   | 1110.16259 | -2.1935255   | 0.33967559 | -5.0521926 | 4.37E-07   | 8.96E-06   |
| MT1L       | 22.0458816 | 1.95690187   | 0.39983386 | 5.04663161 | 4.50E-07   | 9.14E-06   |
| LINC00667  | 124.738641 | -0.9853913   | 0.19020589 | -4.8295123 | 1.37E-06   | 2.37E-05   |
| ZFAS1      | 770.677886 | -1.2114361   | 0.22524652 | -4.8229585 | 1.41E-06   | 2.43E-05   |
| LINC00989  | 7443.56582 | -1.7140028   | 0.2883521  | -4.7368801 | 2.17E-06   | 3.46E-05   |
| HHLA3      | 37.3416835 | 1.21112993   | 0.24179048 | 4.66917186 | 3.02E-06   | 4.57E-05   |
| LINC01686  | 30.4591717 | -1.5719219   | 0.26994642 | -4.6114996 | 4.00E-06   | 5.73E-05   |
| WASIR2     | 43.3167126 | 2.21529958   | 0.39558587 | 4.59329224 | 4.36E-06   | 6.18E-05   |
| ANKRD18DP  | 27.8528501 | -1.6770181   | 0.30143038 | -4.5711024 | 4.85E-06   | 6.74E-05   |
| LINC01816  | 21.3715116 | 1.52578952   | 0.28522809 | 4.55807406 | 5.16E-06   | 7.11E-05   |
| LINC00649  | 34.8121712 | -1.5136472   | 0.30369137 | -4.5565699 | 5.20E-06   | 7.15E-05   |
| GOLGA6L17I | 55.5492253 | 1.63824758   | 0.31605436 | 4.51703481 | 6.27E-06   | 8.32E-05   |
| ZNF542P    | 1859.97136 | -1.798552    | 0.31826653 | -4.5072002 | 6.57E-06   | 8.62E-05   |
| LINC00642  | 12.3262931 | -2.042877    | 0.37968977 | -4.503952  | 6.67E-06   | 8.75E-05   |
| CRY2L2P    | 258.679365 | 1.08465028   | 0.23747578 | 4.33426424 | 1.46E-05   | 0.0001652  |
| STAG3L4    | 72.7622771 | 0.90594418   | 0.1961482  | 4.33093021 | 1.48E-05   | 0.00016714 |
| TXLNGY     | 70.2890279 | -0.8067054   | 0.56425165 | -4.2988946 | 1.72E-05   | 0.00018992 |
| SNHG20     | 1252.2434  | 1.40246076   | 0.29260331 | 4.27605526 | 1.90E-05   | 0.00020689 |
| CA5BP1     | 74.5936639 | 0.91103632   | 0.20094491 | 4.18177511 | 2.89E-05   | 0.00029187 |
| ZNF702P    | 21.8809927 | -1.2225697   | 0.26151007 | -4.1777818 | 2.94E-05   | 0.00029588 |
| MALAT1     | 20950.7202 | -1.171433    | 0.28424084 | -4.1329002 | 3.58E-05   | 0.00034627 |
| BMS1P1     | 79.8644082 | -1.7747868   | 0.37809336 | -4.0680245 | 4.74E-05   | 0.00043264 |
| LINC01137  | 100.470031 | -1.2547907   | 0.26157908 | -4.0597675 | 4.91E-05   | 0.00044601 |
| DANCR      | 129.858339 | 1.31387428   | 0.27296095 | 4.05506872 | 5.01E-05   | 0.0004522  |
| ZNF767P    | 78.9102273 | -0.8299822   | 0.20414764 | -3.7913733 | 0.00014982 | 0.00111033 |
| HRAT92     | 1485.80332 | -1.5534809   | 0.32263046 | -3.7672017 | 0.00016509 | 0.00119394 |
| MYOSLID    | 87.8957944 | -1.5261351   | 0.30266783 | -3.7608812 | 0.00016932 | 0.00122109 |
| TMEM198B   | 72.6128627 | 0.84693583   | 0.21305753 | 3.69494549 | 0.00021993 | 0.00150595 |
| APTR       | 16.6293968 | 1.21911742   | 0.27828674 | 3.63909417 | 0.0002736  | 0.00179506 |
| CLUHP3     | 13.3693335 | -1.7654836   | 0.50442982 | -3.6277408 | 0.00028591 | 0.00186231 |
| GVINP1     | 109.956496 | -1.18737     | 0.31763794 | -3.6259605 | 0.00028789 | 0.00187156 |
| TRPC2      | 270.438119 | 1.02325572   | 0.29103878 | 3.61105738 | 0.00030495 | 0.00196372 |
| LINC02397  | 8.39863836 | -0.9272924   | 0.49896179 | -3.5157165 | 0.00043857 | 0.00265444 |
| PKKY       | 36.6660387 | -0.6522394   | 0.5446327  | -3.5019697 | 0.00046183 | 0.002756   |
| SCARNA10   | 386.403772 | -1.1561412   | 0.45680221 | -3.4994599 | 0.0004662  | 0.00277564 |
| LINC00847  | 59.7405718 | -0.7064881   | 0.18273056 | -3.497419  | 0.00046978 | 0.00279308 |
| SNHG17     | 97.5070658 | 0.7648344    | 0.19732728 | 3.48693675 | 0.00048859 | 0.00287842 |
| LINC01684  | 72.9422645 | -0.8374995   | 0.22681547 | -3.4154821 | 0.00063669 | 0.00357247 |
| SCARNA7    | 64.2222264 | -1.0862699   | 0.41597786 | -3.389683  | 0.00069974 | 0.00384851 |
| SCARNA5    | 74.3397954 | -0.8163805   | 0.48934128 | -3.3778654 | 0.00073051 | 0.00398082 |
| DUBR       | 187.751247 | -1.0820991   | 0.25786418 | -3.3186905 | 0.00090441 | 0.00476108 |
| FIRRE      | 37.6610274 | 1.16533918   | 0.2989336  | 3.31347572 | 0.00092144 | 0.0048251  |
| LINC00665  | 11.3426597 | -1.0038774   | 0.31759928 | -3.3081006 | 0.00093931 | 0.00486865 |
| LINC02444  | 13.0463175 | -1.0599281   | 0.32132346 | -3.3021517 | 0.00095946 | 0.00497559 |
| LINC01534  | 25.7796284 | -1.0153562   | 0.26444037 | -3.2969935 | 0.00097726 | 0.00503857 |
| NBR2       | 58.5627179 | -0.9722597   | 0.25788029 | -3.2919838 | 0.00099483 | 0.00511367 |
| HERC2P9    | 578.492242 | 0.69898328   | 0.19878371 | 3.26856103 | 0.00108096 | 0.00546254 |
| CATSPER2P  | 57.1797883 | 0.73922277   | 0.22145466 | 3.26239388 | 0.00110476 | 0.00554576 |
| LINC01814  | 233.117887 | -0.6690812   | 0.18260855 | -3.2504475 | 0.00115224 | 0.0057216  |
| MIR663AHG  | 47.2413146 | -0.9156299   | 0.47258609 | -3.2443505 | 0.00117719 | 0.00581285 |
| DUXAP8     | 32.55787   | 2.14072931   | 0.45810437 | 3.24227464 | 0.0011858  | 0.00584315 |
| MINCR      | 13.2401831 | 1.1177242    | 0.34085298 | 3.1879989  | 0.00143266 | 0.00681445 |
| MAP3K14    | 32.5368126 | -0.9413573   | 0.33839139 | -3.1511518 | 0.00162628 | 0.00754008 |
| SNORD17    | 131.067946 | -0.6403155   | 0.44086192 | -3.1340518 | 0.0017241  | 0.00793643 |
| LINC01750  | 177.053867 | -1.4234717   | 0.33241096 | -3.127026  | 0.00176584 | 0.00807081 |
| LINC00339  | 26.2887957 | -0.6963345   | 0.22024313 | -3.0888501 | 0.00200933 | 0.00896182 |
| DUXAP10    | 88.9531782 | 1.6724524    | 0.40923458 | 3.08881751 | 0.00200955 | 0.00896182 |
| KIR3DX1    | 14.8612819 | -1.2451781   | 0.33497592 | -3.0635191 | 0.0021875  | 0.0095925  |
| LINC02506  | 38.9670994 | -1.2046384   | 0.61525799 | -3.0347445 | 0.0024074  | 0.01035905 |
| CYTOR      | 2654.42929 | -0.8516447   | 0.22981261 | -3.0289564 | 0.002454   | 0.01051483 |
| LINC00861  | 46.3183483 | -1.6546468   | 0.48926921 | -3.0058821 | 0.00264812 | 0.01115243 |
| LINC00939  | 10.5088034 | -1.3816894   | 0.42167137 | -2.9611514 | 0.00306491 | 0.01252244 |
| CD9P1      | 55.4656821 | 0.65326192   | 0.222176   | 2.9205659  | 0.00349396 | 0.01385738 |
| MIR924HG   | 11.5870364 | -1.0780476   | 0.33546596 | -2.9006194 | 0.00372426 | 0.01459973 |
| PVT1       | 15.5919309 | 0.94085793   | 0.28946548 | 2.87051385 | 0.00409805 | 0.01579555 |
| SNHG7      | 251.166361 | 0.6466723    | 0.209039   | 2.84118188 | 0.00449467 | 0.01705852 |
| MIR22HG    | 220.562225 | 0.74126187   | 0.24501429 | 2.81135092 | 0.0049334  | 0.01839266 |
| LINC02280  | 97.8623144 | -1.0964884   | 0.29677203 | -2.809708  | 0.00495865 | 0.01845471 |
| SCARNA6    | 22.7104976 | -0.7162347   | 0.50641926 | -2.794333  | 0.00520069 | 0.01918351 |
| DPY19L2P2  | 143.786668 | -0.5757799   | 0.18913839 | -2.7860995 | 0.00533465 | 0.01954317 |
| LINC02470  | 32.4988864 | -0.9286029   | 0.4958935  | -2.7704619 | 0.00559769 | 0.02032162 |
| MIRPS31P5  | 21.5300564 | -0.6547881   | 0.26799378 | -2.6799403 | 0.00736353 | 0.02521529 |
| MHENCN     | 16.7707593 | -0.6072653   | 0.25783567 | -2.6691333 | 0.00760473 | 0.02587055 |
| LINC00987  | 328.482169 | -0.7574809   | 0.24131329 | -2.6348109 | 0.00841842 | 0.02813282 |
| ADCY10P1   | 11.6649385 | 0.82871557   | 0.29791244 | 2.63415321 | 0.00843474 | 0.02816543 |
| MIR600HG   | 16.3163891 | -1.061752    | 0.40965187 | -2.601873  | 0.00927162 | 0.03033791 |
| MFS14C     | 26.8218097 | 0.63014847   | 0.22700835 | 2.5819244  | 0.00982511 | 0.03177724 |
| MIR3142HG  | 70.9205333 | -0.8877215   | 0.30563757 | -2.5790587 | 0.009907   | 0.03199383 |
| LINC00507  | 12.8647012 | -0.877875    | 0.29571184 | -2.5736074 | 0.01006444 | 0.03243715 |
| RRP7BP     | 18.7179955 | -0.7307527   | 0.3925651  | -2.5630313 | 0.01037627 | 0.03324231 |
| CASC15     | 109.834567 | -1.1867731   | 0.29877595 | -2.5444431 | 0.01094522 | 0.03477924 |
| LINC02384  | 244.239028 | -0.7122509   | 0.26305089 | -2.5379227 | 0.01115126 | 0.03530318 |
| FAM86C2P   | 18.425204  | -0.9222917   | 0.28345133 | -2.5240664 | 0.01160006 | 0.03641214 |
| FLJ37453   | 56.4820867 | -0.555238    | 0.20008201 | -2.5023982 | 0.01233551 | 0.0383026  |
| CCTBP3     | 1203.53388 | 0.75605772   | 0.2797982  | 2.4911242  | 0.01273396 | 0.03930785 |
| H19        | 313.096933 | -1.1234946   | 0.38181068 | -2.4894083 | 0.01279559 | 0.03943188 |
| STAG3L5P   | 23.7187195 | -0.9215094   | 0.35668759 | -2.4602428 | 0.01388443 | 0.04206156 |
| JPX        | 66.9551008 | -0.4771308   | 0.18121018 | -2.4525777 | 0.01418367 | 0.04276708 |
| LINC00641  | 26.8406871 | -0.6002245   | 0.37330883 | -2.4526097 | 0.01418241 | 0.04276708 |
| LINC02043  | 120.520369 | -0.6538486   | 0.23137881 | -2.4482651 | 0.0143546  | 0.04316108 |
| C22orf46   | 49.6938689 | 0.54728016   | 0.20942785 | 2.4267886  | 0.01523313 | 0.04528732 |
| MIAT       | 66.4307001 | -1.1591788   | 0.46142626 | -2.4248697 | 0.01531388 | 0.0455031  |
| CABIN1     | 638.674222 | 0.56993214   | 0.21951572 | 2.42385113 | 0.0153569  | 0.04560985 |
| NEAT1      | 9909.64484 | 0.53094747   | 0.24554853 | 2.41930854 | 0.01555004 | 0.04600296 |
| CROCCP3    | 13.3700881 | -0.8506598   | 0.36721557 | -2.4181241 | 0.01560075 | 0.04609998 |

TableS2C: Non-coding RNA MF vs CTRL FDR <0.05

| NonCoding | baseMean   | log2FC     | negLog10P  | negLog10P   | negLog10P  | negLog10P  | negLog10P | negLog10P | negLog10P |
|-----------|------------|------------|------------|-------------|------------|------------|-----------|-----------|-----------|
| Gene      | CPM        | CPM        | CPM        | CPM         | CPM        | CPM        | CPM       | CPM       | CPM       |
| C06423    | 75.0978463 | 3.8465472  | 0.3866035  | 7.8477720   | 4.23E+1    | 6.28E-13   |           |           |           |
| LINC00888 | 45.0286505 | 2.42391258 | 0.32199856 | 6.5668702   | 5.14E-11   | 1.73E-09   |           |           |           |
| PTEF1     | 90.159390  | -1.8011229 | 0.2467087  | 0.5497114   | 5.76E-11   | 1.93E-09   |           |           |           |
| C19orf4   | 1110.16205 | -0.2960000 | 0.3333593  | 0.2452008   | 4.23E-10   | 1.06E-08   |           |           |           |
| MTL       | 22.0458816 | 2.78634493 | 0.40966418 | 6.22977483  | 4.67E-10   | 1.19E-08   |           |           |           |
| C19orf48  | 48.0423819 | -2.9065684 | 0.36994989 | 6.02032087  | 1.74E-09   | 3.61E-08   |           |           |           |
| LINC00989 | 7443.96582 | -2.2948612 | 0.3033259  | 0.6089973   | 1.87E-09   | 3.81E-08   |           |           |           |
| ZNF542P   | 1859.97136 | 2.5229016  | 0.33258228 | 5.8678920   | 4.41E-09   | 7.98E-08   |           |           |           |
| LINC01534 | 25.7796284 | -1.9739679 | 0.28211136 | 0.58661839  | 4.46E-09   | 8.05E-08   |           |           |           |
| GSTT2     | 12.2152256 | 3.47898268 | 0.53431154 | 5.70520038  | 8.91E-09   | 1.45E-07   |           |           |           |
| ANCR10B   | 27.8528901 | -2.2382841 | 0.31729258 | 0.69856565  | 1.21E-08   | 1.88E-07   |           |           |           |
| CYTOR     | 2654.42929 | -1.6378818 | 0.24246011 | 0.6714256   | 1.42E-08   | 2.17E-07   |           |           |           |
| LINC01684 | 72.9422645 | -1.4909895 | 0.24027484 | 0.6042808   | 2.09E-08   | 3.01E-07   |           |           |           |
| ZFAS1     | 770.67786  | -1.4117900 | 0.23774249 | 0.5249054   | 1.48E-07   | 1.01E-06   |           |           |           |
| HRAT92    | 1485.80332 | 2.3223765  | 0.36888713 | 0.5132328   | 2.56E-07   | 2.54E-06   |           |           |           |
| DUER      | 187.751247 | -1.7237378 | 0.27109989 | 0.50761456  | 3.65E-07   | 3.59E-06   |           |           |           |
| ANCR95P   | 19471025   | 1.7489585  | 0.22057834 | 0.50764835  | 3.98E-07   | 3.91E-06   |           |           |           |
| LINC01686 | 30.4591717 | -1.8406634 | 0.28539887 | 0.4921145   | 5.97E-07   | 5.22E-06   |           |           |           |
| SMG16     | 191.220158 | 2.14393582 | 0.32520774 | 0.49853618  | 6.18E-07   | 5.38E-06   |           |           |           |
| LINC01648 | 34.8121712 | -1.8688268 | 0.21974256 | 0.49725403  | 6.38E-07   | 5.67E-06   |           |           |           |
| LINC01750 | 177.032867 | 2.1716641  | 0.34657753 | 0.49166023  | 6.57E-06   | 1.14E-05   |           |           |           |
| LINC01814 | 233.117887 | -1.0378028 | 0.19343576 | 0.47641016  | 1.90E-06   | 1.42E-05   |           |           |           |
| LINC00987 | 328.486169 | -1.4109390 | 0.25465642 | 0.4931536   | 2.69E-06   | 1.91E-05   |           |           |           |
| LINC01137 | 100.470031 | -1.5641997 | 0.27574991 | 0.4690821   | 2.73E-06   | 1.94E-05   |           |           |           |
| CASC15    | 109.834567 | 2.0423557  | 0.31382911 | 0.4640021   | 3.10E-06   | 2.17E-05   |           |           |           |
| DLL2      | 235.773981 | -2.102222  | 0.22996966 | 0.4584905   | 4.46E-06   | 2.96E-05   |           |           |           |
| LINC02324 | 150.716456 | 2.3721009  | 0.26242154 | 0.437539    | 4.71E-06   | 3.11E-05   |           |           |           |
| ZNF727P   | 78.9102273 | -1.0880231 | 0.21682766 | 0.4567845   | 4.93E-06   | 3.21E-05   |           |           |           |
| PLEKHAMP1 | 621.977908 | -1.2849808 | 0.24211292 | 0.45420248  | 5.38E-06   | 3.46E-05   |           |           |           |
| MYO10L2   | 87.8957944 | -2.0213922 | 0.31770192 | 0.44581155  | 5.43E-06   | 3.49E-05   |           |           |           |
| LINC02380 | 97.8623144 | -1.8474662 | 0.31193838 | 0.4451083   | 5.57E-06   | 3.64E-05   |           |           |           |
| LINC00504 | 1120.33438 | -1.0354366 | 0.2059126  | 0.4524059   | 6.06E-06   | 3.83E-05   |           |           |           |
| NBR2      | 58.8527179 | -1.4207186 | 0.27250788 | 0.477846    | 7.54E-06   | 4.63E-05   |           |           |           |
| LINC01089 | 894.003268 | -1.3364343 | 0.24897214 | 0.4770785   | 7.79E-06   | 4.77E-05   |           |           |           |
| LINC02043 | 120.520369 | -1.265737  | 0.24474069 | 0.437156    | 9.12E-06   | 5.47E-05   |           |           |           |
| DMCR      | 129.893833 | 1.5283179  | 0.28623605 | 0.43846641  | 1.16E-05   | 6.72E-05   |           |           |           |
| PSMB1     | 170.125138 | 1.0977311  | 0.22433505 | 0.4314746   | 1.35E-05   | 7.65E-05   |           |           |           |
| SDHAF2    | 145.012207 | -1.2303083 | 0.26217482 | 0.4337713   | 1.43E-05   | 8.05E-05   |           |           |           |
| LINC00892 | 167.397507 | -1.7058888 | 0.30722265 | 0.43288409  | 1.49E-05   | 8.34E-05   |           |           |           |
| BNP1P     | 79.8644082 | -2.012152  | 0.30039067 | 0.43120888  | 1.53E-05   | 8.78E-05   |           |           |           |
| SDCR1     | 946.214517 | -1.3138762 | 0.26392184 | 0.43116623  | 1.62E-05   | 8.85E-05   |           |           |           |
| RRNSP2    | 84.2678934 | -1.1188777 | 0.23253151 | 0.4240865   | 2.19E-05   | 0.00011582 |           |           |           |
| MRH142HG  | 70.9203333 | -1.6739080 | 0.30288788 | 0.4241344   | 2.22E-05   | 0.00011708 |           |           |           |
| FLRT43    | 56.4620967 | -1.012941  | 0.21270054 | 0.42371584  | 2.29E-05   | 0.00011878 |           |           |           |
| CENPD1    | 14.2066354 | 1.53338695 | 0.30915007 | 0.42338025  | 2.30E-05   | 0.00012042 |           |           |           |
| LINC00667 | 124.738841 | -0.9048188 | 0.20115045 | 0.4184051   | 2.63E-05   | 0.00014401 |           |           |           |
| WDR32     | 42.3167722 | 2.0650626  | 0.40641727 | 0.41341385  | 3.35E-05   | 0.00017323 |           |           |           |
| CROCCP2   | 98.6861521 | 2.19923408 | 0.38200752 | 0.40831571  | 4.44E-05   | 0.00020908 |           |           |           |
| FAM86DP   | 14.5169738 | 1.52483018 | 0.31964464 | 0.40731758  | 4.63E-05   | 0.00021569 |           |           |           |
| AATRC     | 11.395858  | -1.8880216 | 0.33971244 | 0.40420788  | 5.27E-05   | 0.00024142 |           |           |           |
| CABIN1    | 638.874222 | 0.96681712 | 0.23165777 | 0.40350745  | 5.44E-05   | 0.00024781 |           |           |           |
| LINC00928 | 49.189988  | -1.1995556 | 0.48788134 | 0.40348291  | 5.46E-05   | 0.00024877 |           |           |           |
| ANCR03BPP | 335.779604 | -2.0239999 | 0.40054645 | 0.4084062   | 6.16E-05   | 0.00027647 |           |           |           |
| LINC00447 | 50.7407171 | -0.8603490 | 0.19395413 | 0.39832836  | 6.20E-05   | 0.00029517 |           |           |           |
| SMG8      | 62.2331747 | 1.77598296 | 0.33745158 | 0.39635214  | 7.39E-05   | 0.00032378 |           |           |           |
| PAL2      | 85.1502874 | -1.1934571 | 0.26285674 | 0.39452764  | 7.97E-05   | 0.00034576 |           |           |           |
| NCRAD     | 43931.6513 | -2.2349436 | 0.26471024 | 0.39031679  | 9.42E-05   | 0.00039966 |           |           |           |
| SMDL1P1   | 50.8608729 | -1.0286205 | 0.23667886 | 0.39019855  | 0.00010017 | 0.00042047 |           |           |           |
| XIST      | 477.028751 | 0.05334253 | 0.56999316 | 0.3887079   | 0.00010105 | 0.00042491 |           |           |           |
| ORCL1P    | 26.9325267 | -1.7088227 | 0.3557019  | 0.3883423   | 0.00010201 | 0.00042748 |           |           |           |
| LINC01011 | 1857.91016 | -1.3047424 | 0.27734322 | 0.38129315  | 0.00010716 | 0.00042748 |           |           |           |
| NAPS8     | 26.7641143 | -1.9246707 | 0.46870081 | 0.37512684  | 0.00010756 | 0.00068283 |           |           |           |
| MAP3K14   | 32.5361826 | -1.3673378 | 0.35411677 | 0.3732889   | 0.00010870 | 0.00071876 |           |           |           |
| KSRND1    | 14.8612913 | -1.7347687 | 0.32674966 | 0.3731484   | 0.00010925 | 0.00073161 |           |           |           |
| RMV3      | 66.6363011 | -2.245866  | 0.41199114 | 0.3715451   | 0.00020284 | 0.00077189 |           |           |           |
| LINC00642 | 12.3262931 | -1.9131791 | 0.39143144 | 0.3700913   | 0.000208   | 0.00078988 |           |           |           |
| KOXC10T1  | 1447.97863 | -0.8490505 | 0.20378262 | 0.37033029  | 0.00021304 | 0.00086059 |           |           |           |
| LINC00664 | 11.8542399 | 1.92932098 | 0.47938487 | 0.369481315 | 0.00022005 | 0.00082879 |           |           |           |
| TREM13P   | 465.150144 | 1.31624434 | 0.32613807 | 0.36888416  | 0.00022515 | 0.00084504 |           |           |           |
| LINC02584 | 244.230228 | -1.1297206 | 0.27600201 | 0.36860042  | 0.00024445 | 0.00090788 |           |           |           |
| DSTN2P    | 38.819312  | -1.0716303 | 0.24259436 | 0.36540504  | 0.00025768 | 0.000947   |           |           |           |
| LINC00458 | 12.1236705 | -1.5995151 | 0.3898291  | 0.3630438   | 0.00025915 | 0.00095193 |           |           |           |
| CENPD1P1  | 839.764226 | -1.7548006 | 0.35402926 | 0.3636671   | 0.00027618 | 0.00107777 |           |           |           |
| TALYD     | 70.2892971 | -1.180766  | 0.5039181  | 0.36303     | 0.00028324 | 0.00109277 |           |           |           |
| MEHCR     | 16.7707593 | 0.973627   | 0.27490611 | 0.3590558   | 0.00040156 | 0.00139824 |           |           |           |
| LINC00861 | 46.3183483 | -2.2999795 | 0.49114025 | 0.35890516  | 0.00040399 | 0.00140319 |           |           |           |
| PAD2P3    | 33.3887481 | -0.8416465 | 0.20835439 | 0.3582862   | 0.00041732 | 0.00144723 |           |           |           |
| LINC00339 | 26.2887957 | 0.8622708  | 0.23369017 | 0.35206165  | 0.00043055 | 0.00148629 |           |           |           |
| NAT18     | 484.35185  | -2.873628  | 0.29952305 | 0.35030674  | 0.00045993 | 0.00157255 |           |           |           |
| CASBP1    | 74.2948688 | 0.80865319 | 0.21644433 | 0.35025865  | 0.00046109 | 0.00157542 |           |           |           |
| TSSIC     | 97.4547059 | -0.9203902 | 0.2273462  | 0.4579156   | 0.00046909 | 0.00160001 |           |           |           |
| LINC02444 | 13.0463175 | -1.288217  | 0.33813191 | 0.3494946   | 0.00047415 | 0.00161643 |           |           |           |
| LINC02470 | 32.4988864 | -1.6620767 | 0.49562    | 0.4642924   | 0.00053163 | 0.00178262 |           |           |           |
| LINC01151 | 213.579284 | -1.5371713 | 0.32429246 | 0.4633688   | 0.00053332 | 0.00178664 |           |           |           |
| LINC00583 | 238.87796  | -1.2414011 | 0.27894586 | 0.4501682   | 0.00056024 | 0.00186688 |           |           |           |
| ZNF78P    | 54.208208  | -1.4674708 | 0.34348969 | 0.4330929   | 0.00058373 | 0.00193472 |           |           |           |
| LINC00654 | 19.71144   | 1.16059959 | 0.29329828 | 0.4372025   | 0.0005862  | 0.00194033 |           |           |           |
| LINC01282 | 165.339    | -1.2212189 | 0.29084044 | 0.4309394   | 0.00057155 | 0.00217412 |           |           |           |
| DDX11L2   | 1595.81206 | -1.8195402 | 0.37295676 | 0.332444    | 0.00060087 | 0.00208873 |           |           |           |
| PVT1      | 15.3919309 | 1.18516305 | 0.30260021 | 0.32011314  | 0.00060989 | 0.00209221 |           |           |           |
| LINC02507 | 12.8647012 | -1.2613179 | 0.3199938  | 0.3287818   | 0.0011134  | 0.00269114 |           |           |           |
| LINC00211 | 11751.0583 | -1.272427  | 0.30596783 | 0.32703809  | 0.00107403 | 0.00325446 |           |           |           |
| LINC00211 | 132.800892 | -1.0251375 | 0.25600732 | 0.2997174   | 0.00107658 | 0.00326133 |           |           |           |
| LINC01128 | 87.4916407 | 1.3395150  | 0.34191924 | 0.24643523  | 0.0011668  | 0.00409419 |           |           |           |
| DFY19L2P2 | 143.786668 | 0.7117207  | 0.20403991 | 0.1993383   | 0.00137743 | 0.00420027 |           |           |           |
| MEG3      | 80.2974477 | 1.7362028  | 0.38197238 | 0.1978024   | 0.00138479 | 0.00403949 |           |           |           |
| LINC01023 | 21.3270888 | -1.25476   | 0.28920697 | 0.1953416   | 0.00139179 | 0.00454047 |           |           |           |
| LINC01554 | 62.3176692 | -1.036027  | 0.28633993 | 0.1802952   | 0.00147125 | 0.0042442  |           |           |           |
| RFP       | 8.69992066 | 1.5408748  | 0.3805712  | 0.1365874   | 0.00170926 | 0.00482371 |           |           |           |
| LINC00887 | 104.333292 | -0.82281   | 0.22478043 | 0.12889924  | 0.00174403 | 0.00426844 |           |           |           |
| CLHNP3    | 13.3833335 | -2.0201713 | 0.60200811 | 0.1246873   | 0.0017794  | 0.00469568 |           |           |           |
| LINC00939 | 10.5088034 | -1.7572943 | 0.43158763 | 0.096198    | 0.00197731 | 0.00548158 |           |           |           |
| ZNF21P    | 3339.00226 | -0.8862831 | 0.23699113 | 0.0917168   | 0.00198003 | 0.00551091 |           |           |           |
| LINC01789 | 29.9384101 | -2.994961  | 0.30111105 | 0.0888006   | 0.0020921  | 0.00545439 |           |           |           |
| RPL13P5   | 75.2700979 | 0.9073819  | 0.23262205 | 0.0680376   | 0.0021547  | 0.00590968 |           |           |           |
| GAL5      | 176.304887 | 0.9337967  | 0.25178273 | 0.05538052  | 0.00217    |            |           |           |           |

**Table S3A: Genes Upregulated in MF and Downregulated in the RUX-treated cohort**

| <b>Gene</b> | <b>Name</b>                                                 |
|-------------|-------------------------------------------------------------|
| APLP1       | amyloid beta precursor like protein 1                       |
| IFI6        | interferon alpha inducible protein 6                        |
| GCH1        | GTP cyclohydrolase 1                                        |
| CAMK2A      | calcium/calmodulin dependent protein kinase II alpha        |
| TNIP2       | TNFAIP3 interacting protein 2                               |
| IFIT1       | interferon induced protein with tetratricopeptide repeats 1 |
| NDRG3       | NDRG family member 3                                        |
| IFIT2       | interferon induced protein with tetratricopeptide repeats 2 |
| PLEKHM1     | pleckstrin homology and RUN domain containing M1            |
| JOSD1       | Josephin domain containing 1                                |
| MYLIP       | myosin regulatory light chain interacting protein           |
| FAM89B      | family with sequence similarity 89 member B                 |
| SCIN        | scinderin                                                   |
| NPL         | N-acetylneuraminase pyruvate lyase                          |
| ODF3B       | outer dense fiber of sperm tails 3B                         |
| EIF1AY      | eukaryotic translation initiation factor 1A Y-linked        |
| IFI27L2     | interferon alpha inducible protein 27 like 2                |
| ISCU        | iron-sulfur cluster assembly enzyme                         |

**Table S3B: Genes Downregulated in MF and Upregulated in the RUX-treated cohort**

| <b>Gene</b>  | <b>Name</b>                                |
|--------------|--------------------------------------------|
| LINC00926    | long intergenic non-protein coding RNA 926 |
| SEMA3C       | semaphorin 3C                              |
| ADGRG7       | adhesion G protein-coupled receptor G7     |
| CXCR5        | C-X-C motif chemokine receptor 5           |
| LOC101927151 | uncharacterized LOC101927151               |
| SMC5         | structural maintenance of chromosomes 5    |
| PER3         | period circadian regulator 3               |
| SNORD17      | small nucleolar RNA, C/D box 17            |
| LMO7         | LIM domain 7                               |

**Table S4A: Gene Set Enrichment Pathway Analysis ET vs CTRL**

| NAME                                       | SIZE | NES         | FDR q-val   | Lower Level                       | Upper Level        |
|--------------------------------------------|------|-------------|-------------|-----------------------------------|--------------------|
| HALLMARK_FATTY_ACID_METABOLISM             | 129  | 1.8118953   | 0.007511497 | FATTY_ACID_METABOLISM             | metabolic          |
| HALLMARK_ADIPOGENESIS                      | 172  | 1.7318747   | 0.0114795   | ADIPOGENESIS                      | development        |
| HALLMARK_GLYCOLYSIS                        | 146  | 1.6732337   | 0.016614022 | GLYCOLYSIS                        | metabolic          |
| HALLMARK_APICAL_JUNCTION                   | 127  | 1.6097152   | 0.022050116 | APICAL_JUNCTION                   | cellular component |
| HALLMARK_OXIDATIVE_PHOSPHORYLATION         | 183  | 1.6249464   | 0.024344018 | OXIDATIVE_PHOSPHORYLATION         | metabolic          |
| HALLMARK_MTORC1_SIGNALING                  | 190  | 1.4962126   | 0.06486081  | MTORC1_SIGNALING                  | signaling          |
| HALLMARK_XENOBIOTIC_METABOLISM             | 128  | 1.497276    | 0.07428097  | XENOBIOTIC_METABOLISM             | metabolic          |
| HALLMARK_PEROXISOME                        | 81   | 1.4680862   | 0.076201215 | PEROXISOME                        | cellular component |
| HALLMARK_COAGULATION                       | 78   | 1.406872    | 0.10213155  | COAGULATION                       | immune             |
| HALLMARK_ANDROGEN_RESPONSE                 | 85   | 1.4086183   | 0.11024309  | ANDROGEN_RESPONSE                 | signaling          |
| HALLMARK_PROTEIN_SECRETION                 | 91   | 1.4120365   | 0.11874847  | PROTEIN_SECRETION                 | pathway            |
| HALLMARK_ALLOGRAFT_REJECTION               | 151  | -1.4392167  | 0.12846054  | ALLOGRAFT_REJECTION               | immune             |
| HALLMARK_CHOLESTEROL_HOMEOSTASIS           | 64   | 1.372009    | 0.13062237  | CHOLESTEROL_HOMEOSTASIS           | metabolic          |
| HALLMARK_TNFA_SIGNALING_VIA_NFKB           | 162  | -1.5032148  | 0.14304653  | TNFA_SIGNALING_VIA_NFKB           | signaling          |
| HALLMARK_INTERFERON_ALPHA_RESPONSE         | 89   | 1.3321728   | 0.16736604  | INTERFERON_ALPHA_RESPONSE         | immune             |
| HALLMARK_REACTIVE_OXYGEN_SPECIES_PATHWAY   | 48   | 1.2765079   | 0.22986871  | REACTIVE_OXYGEN_SPECIES_PATHWAY   | pathway            |
| HALLMARK_MYOGENESIS                        | 115  | 1.2783359   | 0.24290702  | MYOGENESIS                        | development        |
| HALLMARK_APOPTOSIS                         | 138  | 1.2210994   | 0.3065594   | APOPTOSIS                         | pathway            |
| HALLMARK_BILE_ACID_METABOLISM              | 70   | 1.2247      | 0.31768104  | BILE_ACID_METABOLISM              | metabolic          |
| HALLMARK_UV_RESPONSE_DN                    | 109  | -1.2210813  | 0.3375144   | UV_RESPONSE_DN                    | DNA damage         |
| HALLMARK_DNA_REPAIR                        | 143  | 1.1955484   | 0.34101444  | DNA_REPAIR                        | DNA damage         |
| HALLMARK_KRAS_SIGNALING_UP                 | 123  | -1.2409247  | 0.38903093  | KRAS_SIGNALING_UP                 | signaling          |
| HALLMARK_UV_RESPONSE_UP                    | 125  | 1.1575215   | 0.4082876   | UV_RESPONSE_UP                    | DNA damage         |
| HALLMARK_COMPLEMENT                        | 156  | 1.079815    | 0.43777266  | COMPLEMENT                        | immune             |
| HALLMARK_P53_PATHWAY                       | 162  | 1.1330146   | 0.44727734  | P53_PATHWAY                       | proliferation      |
| HALLMARK_UNFOLDED_PROTEIN_RESPONSE         | 103  | 1.082889    | 0.44814357  | UNFOLDED_PROTEIN_RESPONSE         | pathway            |
| HALLMARK_KRAS_SIGNALING_DN                 | 72   | 1.1056865   | 0.44971326  | KRAS_SIGNALING_DN                 | signaling          |
| HALLMARK_IL2_STAT5_SIGNALING               | 158  | 1.1219251   | 0.45266697  | IL2_STAT5_SIGNALING               | signaling          |
| HALLMARK_EPITHELIAL_MESENCHYMAL_TRANSITION | 115  | 1.1106548   | 0.45790106  | EPITHELIAL_MESENCHYMAL_TRANSITION | development        |
| HALLMARK_INTERFERON_GAMMA_RESPONSE         | 177  | 1.0849764   | 0.4614395   | INTERFERON_GAMMA_RESPONSE         | immune             |
| HALLMARK_ESTROGEN_RESPONSE_LATE            | 135  | 1.0897365   | 0.46908423  | ESTROGEN_RESPONSE_LATE            | signaling          |
| HALLMARK_WNT_BETA_CATENIN_SIGNALING        | 30   | -1.0684173  | 0.4762125   | WNT_BETA_CATENIN_SIGNALING        | signaling          |
| HALLMARK_G2M_CHECKPOINT                    | 191  | 1.0252559   | 0.52272725  | G2M_CHECKPOINT                    | proliferation      |
| HALLMARK_PI3K_AKT_MTOR_SIGNALING           | 92   | -1.1251472  | 0.5303781   | PI3K_AKT_MTOR_SIGNALING           | signaling          |
| HALLMARK_HEDGEHOG_SIGNALING                | 21   | -1.0717624  | 0.53431135  | HEDGEHOG_SIGNALING                | signaling          |
| HALLMARK_HYPOXIA                           | 138  | 1.0261731   | 0.5390404   | HYPOXIA                           | pathway            |
| HALLMARK_INFLAMMATORY_RESPONSE             | 143  | -1.0926526  | 0.5442097   | INFLAMMATORY_RESPONSE             | immune             |
| HALLMARK_MYC_TARGETS_V1                    | 193  | 0.9829576   | 0.598892    | MYC_TARGETS_V1                    | proliferation      |
| HALLMARK_ESTROGEN_RESPONSE_EARLY           | 136  | 0.9546907   | 0.62060666  | ESTROGEN_RESPONSE_EARLY           | signaling          |
| HALLMARK_E2F_TARGETS                       | 198  | 0.9593918   | 0.6301633   | E2F_TARGETS                       | proliferation      |
| HALLMARK_SPERMATOGENESIS                   | 66   | 0.93009776  | 0.65188074  | SPERMATOGENESIS                   | development        |
| HALLMARK_HEME_METABOLISM                   | 186  | 0.91314536  | 0.6677364   | HEME_METABOLISM                   | metabolic          |
| HALLMARK_MITOTIC_SPINDLE                   | 189  | 0.817258    | 0.828359    | MITOTIC_SPINDLE                   | proliferation      |
| HALLMARK_TGF_BETA_SIGNALING                | 48   | -0.9497621  | 0.8393127   | TGF_BETA_SIGNALING                | signaling          |
| HALLMARK_APICAL_SURFACE                    | 26   | -0.92444056 | 0.8456369   | APICAL_SURFACE                    | cellular component |
| HALLMARK_MYC_TARGETS_V2                    | 57   | 0.7569921   | 0.8991134   | MYC_TARGETS_V2                    | proliferation      |
| HALLMARK_IL6_JAK_STAT3_SIGNALING           | 65   | -0.8349971  | 0.9259255   | IL6_JAK_STAT3_SIGNALING           | immune             |
| HALLMARK_ANGIOGENESIS                      | 23   | -0.76122874 | 0.9430061   | ANGIOGENESIS                      | development        |
| HALLMARK_NOTCH_SIGNALING                   | 26   | -0.861826   | 0.95274657  | NOTCH_SIGNALING                   | signaling          |



**Table S4B: Gene Set Enrichment Pathway Analysis PV vs CTRL**

| NAME                                       | SIZE | NES        | FDR q-val   | Lower Level                       | Upper Level        |
|--------------------------------------------|------|------------|-------------|-----------------------------------|--------------------|
| HALLMARK_ADIPOGENESIS                      | 172  | 1.7491294  | 0.012118747 | ADIPOGENESIS                      | development        |
| HALLMARK_GLYCOLYSIS                        | 146  | 1.6530863  | 0.01930149  | GLYCOLYSIS                        | metabolic          |
| HALLMARK_APICAL_JUNCTION                   | 127  | 1.660242   | 0.025757005 | APICAL_JUNCTION                   | cellular component |
| HALLMARK_FATTY_ACID_METABOLISM             | 129  | 1.6055912  | 0.026302228 | FATTY_ACID_METABOLISM             | metabolic          |
| HALLMARK_COAGULATION                       | 78   | 1.5808175  | 0.02970178  | COAGULATION                       | immune             |
| HALLMARK_OXIDATIVE_PHOSPHORYLATION         | 183  | 1.5442894  | 0.039326318 | OXIDATIVE_PHOSPHORYLATION         | metabolic          |
| HALLMARK_CHOLESTEROL_HOMEOSTASIS           | 64   | 1.5314032  | 0.04042827  | CHOLESTEROL_HOMEOSTASIS           | metabolic          |
| HALLMARK_XENOBIOTIC_METABOLISM             | 128  | 1.5096257  | 0.042610623 | XENOBIOTIC_METABOLISM             | metabolic          |
| HALLMARK_INTERFERON_ALPHA_RESPONSE         | 89   | 1.518906   | 0.04321455  | INTERFERON_ALPHA_RESPONSE         | immune             |
| HALLMARK_HEME_METABOLISM                   | 186  | 1.4567754  | 0.0673379   | HEME_METABOLISM                   | metabolic          |
| HALLMARK_PEROXISOME                        | 81   | 1.4418689  | 0.07086366  | PEROXISOME                        | cellular component |
| HALLMARK_MTORC1_SIGNALING                  | 190  | 1.3795087  | 0.12471676  | MTORC1_SIGNALING                  | signaling          |
| HALLMARK_MYOGENESIS                        | 115  | 1.3494041  | 0.14121492  | MYOGENESIS                        | development        |
| HALLMARK_EPITHELIAL_MESENCHYMAL_TRANSITION | 115  | 1.356965   | 0.1420532   | EPITHELIAL_MESENCHYMAL_TRANSITION | development        |
| HALLMARK_BILE_ACID_METABOLISM              | 70   | 1.3197786  | 0.17186424  | BILE_ACID_METABOLISM              | metabolic          |
| HALLMARK_P53_PATHWAY                       | 162  | 1.2998974  | 0.17200567  | P53_PATHWAY                       | proliferation      |
| HALLMARK_INTERFERON_GAMMA_RESPONSE         | 177  | 1.3008407  | 0.18022385  | INTERFERON_GAMMA_RESPONSE         | immune             |
| HALLMARK_PROTEIN_SECRETION                 | 91   | 1.3067324  | 0.18193667  | PROTEIN_SECRETION                 | pathway            |
| HALLMARK_KRAS_SIGNALING_DN                 | 72   | 1.2802348  | 0.18998314  | KRAS_SIGNALING_DN                 | signaling          |
| HALLMARK_DNA_REPAIR                        | 143  | 1.2603142  | 0.20102613  | DNA_REPAIR                        | DNA damage         |
| HALLMARK_IL2_STAT5_SIGNALING               | 158  | 1.2645485  | 0.20397907  | IL2_STAT5_SIGNALING               | signaling          |
| HALLMARK_ALLOGRAFT_REJECTION               | 151  | -1.3648527 | 0.2617964   | ALLOGRAFT_REJECTION               | immune             |
| HALLMARK_UV_RESPONSE_UP                    | 125  | 1.1793895  | 0.34141245  | UV_RESPONSE_UP                    | DNA damage         |
| HALLMARK_COMPLEMENT                        | 156  | 1.171932   | 0.34395382  | COMPLEMENT                        | immune             |
| HALLMARK_ESTROGEN_RESPONSE_LATE            | 135  | 1.1602746  | 0.35328636  | ESTROGEN_RESPONSE_LATE            | signaling          |
| HALLMARK_HEDGEHOG_SIGNALING                | 21   | -1.2357339 | 0.35349664  | HEDGEHOG_SIGNALING                | signaling          |
| HALLMARK_TNFA_SIGNALING_VIA_NFKB           | 162  | -1.1725798 | 0.3754302   | TNFA_SIGNALING_VIA_NFKB           | signaling          |
| HALLMARK_ESTROGEN_RESPONSE_EARLY           | 136  | 1.1259818  | 0.4149885   | ESTROGEN_RESPONSE_EARLY           | signaling          |
| HALLMARK_REACTIVE_OXYGEN_SPECIES_PATHWAY   | 48   | 1.0937103  | 0.475638    | REACTIVE_OXYGEN_SPECIES_PATHWAY   | pathway            |
| HALLMARK_APOPTOSIS                         | 138  | 1.0725611  | 0.5131383   | APOPTOSIS                         | pathway            |
| HALLMARK_ANDROGEN_RESPONSE                 | 85   | 1.061999   | 0.51994646  | ANDROGEN_RESPONSE                 | signaling          |
| HALLMARK_INFLAMMATORY_RESPONSE             | 143  | 1.0041803  | 0.65263337  | INFLAMMATORY_RESPONSE             | immune             |
| HALLMARK_IL6_JAK_STAT3_SIGNALING           | 65   | 0.97972196 | 0.6693822   | IL6_JAK_STAT3_SIGNALING           | immune             |
| HALLMARK_G2M_CHECKPOINT                    | 191  | 0.98495644 | 0.67889416  | G2M_CHECKPOINT                    | proliferation      |
| HALLMARK_UNFOLDED_PROTEIN_RESPONSE         | 103  | 0.9614258  | 0.6946754   | UNFOLDED_PROTEIN_RESPONSE         | pathway            |
| HALLMARK_HYPOXIA                           | 138  | 0.94022757 | 0.7245265   | HYPOXIA                           | pathway            |
| HALLMARK_PI3K_AKT_MTOR_SIGNALING           | 92   | 0.9294137  | 0.7290277   | PI3K_AKT_MTOR_SIGNALING           | signaling          |
| HALLMARK_SPERMATOGENESIS                   | 66   | 0.9083337  | 0.7548022   | SPERMATOGENESIS                   | development        |
| HALLMARK_MITOTIC_SPINDLE                   | 189  | 0.8941381  | 0.765224    | MITOTIC_SPINDLE                   | proliferation      |
| HALLMARK_UV_RESPONSE_DN                    | 109  | -1.0125421 | 0.8153306   | UV_RESPONSE_DN                    | DNA damage         |
| HALLMARK_WNT_BETA_CATENIN_SIGNALING        | 30   | 0.8177549  | 0.90225345  | WNT_BETA_CATENIN_SIGNALING        | signaling          |
| HALLMARK_ANGIOGENESIS                      | 23   | 0.7963376  | 0.91691846  | ANGIOGENESIS                      | development        |
| HALLMARK_KRAS_SIGNALING_UP                 | 123  | -0.950727  | 0.9232399   | KRAS_SIGNALING_UP                 | signaling          |
| HALLMARK_E2F_TARGETS                       | 198  | 0.77223194 | 0.9336657   | E2F_TARGETS                       | proliferation      |
| HALLMARK_NOTCH_SIGNALING                   | 26   | -0.7739246 | 0.9437037   | NOTCH_SIGNALING                   | signaling          |
| HALLMARK_MYC_TARGETS_V1                    | 193  | 0.74576426 | 0.94463915  | MYC_TARGETS_V1                    | proliferation      |
| HALLMARK_MYC_TARGETS_V2                    | 57   | 0.6715539  | 0.97912604  | MYC_TARGETS_V2                    | proliferation      |
| HALLMARK_APICAL_SURFACE                    | 26   | -0.8297998 | 0.9997721   | APICAL_SURFACE                    | cellular component |
| HALLMARK_TGF_BETA_SIGNALING                | 48   | -0.8463163 | 1           | TGF_BETA_SIGNALING                | signaling          |

**Table S4C: Gene Set Enrichment Pathway Analysis MF vs CTRL**

| NAME                                      | SIZE | NES        | FDR q-val   | Lower Level                      | Upper Level        |
|-------------------------------------------|------|------------|-------------|----------------------------------|--------------------|
| HALLMARK_E2F_TARGETS                      | 198  | 2.2282386  |             | 0 E2F_TARGETS                    | proliferation      |
| HALLMARK_MYC_TARGETS_V1                   | 193  | 2.1653433  |             | 0 MYC_TARGETS_V1                 | proliferation      |
| HALLMARK_G2M_CHECKPOINT                   | 191  | 2.0521796  |             | 0 G2M_CHECKPOINT                 | proliferation      |
| HALLMARK_FATTY_ACID_METABOLISM            | 129  | 1.9544679  |             | 0 FATTY_ACID_METABOLISM          | metabolic          |
| HALLMARK_OXIDATIVE_PHOSPHORYLATION        | 183  | 1.9378474  |             | 0 OXIDATIVE_PHOSPHORYLATION      | metabolic          |
| HALLMARK_HEME_METABOLISM                  | 186  | 1.9081693  |             | 0 HEME_METABOLISM                | metabolic          |
| HALLMARK_ADIPOGENESIS                     | 172  | 1.8256093  |             | 0 ADIPOGENESIS                   | development        |
| HALLMARK_MTORC1_SIGNALING                 | 190  | 1.8196555  | 9.69E-05    | MTORC1_SIGNALING                 | signaling          |
| HALLMARK_MYC_TARGETS_V2                   | 57   | 1.8229932  | 0.000109    | MYC_TARGETS_V2                   | proliferation      |
| HALLMARK_CHOLESTEROL_HOMEOSTASIS          | 64   | 1.7167392  | 0.000656    | CHOLESTEROL_HOMEOSTASIS          | metabolic          |
| HALLMARK_GLYCOLYSIS                       | 146  | 1.7352828  | 0.000722    | GLYCOLYSIS                       | metabolic          |
| HALLMARK_UNFOLDED_PROTEIN_RESPONSE        | 103  | 1.6793369  | 0.001606297 | UNFOLDED_PROTEIN_RESPONSE        | pathway            |
| HALLMARK_PEROXISOME                       | 81   | 1.6652691  | 0.001979208 | PEROXISOME                       | cellular component |
| HALLMARK_BILE_ACID_METABOLISM             | 70   | 1.6472547  | 0.002317972 | BILE_ACID_METABOLISM             | metabolic          |
| HALLMARK_DNA_REPAIR                       | 143  | 1.567265   | 0.006026251 | DNA_REPAIR                       | DNA damage         |
| HALLMARK_XENOBIOTIC_METABOLISM            | 128  | 1.5719225  | 0.00610644  | XENOBIOTIC_METABOLISM            | metabolic          |
| HALLMARK_TNFA_SIGNALING_VIA_NFKB          | 162  | -1.6079856 | 0.014967728 | TNFA_SIGNALING_VIA_NFKB          | signaling          |
| HALLMARK_UV_RESPONSE_DN                   | 109  | -1.6162648 | 0.026313726 | UV_RESPONSE_DN                   | DNA damage         |
| HALLMARK_UV_RESPONSE_UP                   | 125  | 1.4404038  | 0.030453881 | UV_RESPONSE_UP                   | DNA damage         |
| HALLMARK_ESTROGEN_RESPONSE_LATE           | 135  | 1.4200132  | 0.036488954 | ESTROGEN_RESPONSE_LATE           | signaling          |
| HALLMARK_APICAL_JUNCTION                  | 127  | 1.2958041  | 0.13213581  | APICAL_JUNCTION                  | cellular component |
| HALLMARK_INTERFERON_ALPHA_RESPONSE        | 89   | 1.2880113  | 0.13591722  | INTERFERON_ALPHA_RESPONSE        | immune             |
| HALLMARK_REACTIVE_OXYGEN_SPECIES_PATHWA   | 48   | 1.2698575  | 0.15439267  | REACTIVE_OXYGEN_SPECIES_PATHWA   | pathway            |
| HALLMARK_P53_PATHWAY                      | 162  | 1.2502935  | 0.1753588   | P53_PATHWAY                      | proliferation      |
| HALLMARK_COAGULATION                      | 78   | 1.2284198  | 0.20240758  | COAGULATION                      | immune             |
| HALLMARK_MITOTIC_SPINDLE                  | 189  | 1.2146338  | 0.21652985  | MITOTIC_SPINDLE                  | proliferation      |
| HALLMARK_PROTEIN_SECRETION                | 91   | 1.1643198  | 0.3081479   | PROTEIN_SECRETION                | pathway            |
| HALLMARK_ESTROGEN_RESPONSE_EARLY          | 136  | 1.121265   | 0.40073216  | ESTROGEN_RESPONSE_EARLY          | signaling          |
| HALLMARK_MYOGENESIS                       | 115  | 1.1136562  | 0.40471503  | MYOGENESIS                       | development        |
| HALLMARK_HYPOXIA                          | 138  | 1.1011097  | 0.42094424  | HYPOXIA                          | pathway            |
| HALLMARK_ANGIOGENESIS                     | 23   | 1.0774357  | 0.46749738  | ANGIOGENESIS                     | development        |
| HALLMARK_SPERMATOGENESIS                  | 66   | 1.0559838  | 0.50928974  | SPERMATOGENESIS                  | development        |
| HALLMARK_EPITHELIAL_MESENCHYMAL_TRANSITIO | 115  | 1.0231813  | 0.58039236  | EPITHELIAL_MESENCHYMAL_TRANSITIO | development        |
| HALLMARK_APOPTOSIS                        | 138  | 1.0045238  | 0.61114854  | APOPTOSIS                        | pathway            |
| HALLMARK_INTERFERON_GAMMA_RESPONSE        | 177  | 0.98938555 | 0.63126415  | INTERFERON_GAMMA_RESPONSE        | immune             |
| HALLMARK_ALLOGRAFT_REJECTION              | 151  | -1.0892317 | 0.6535871   | ALLOGRAFT_REJECTION              | immune             |
| HALLMARK_NOTCH_SIGNALING                  | 26   | -0.8892041 | 0.7645577   | NOTCH_SIGNALING                  | signaling          |
| HALLMARK_ANDROGEN_RESPONSE                | 85   | -0.9891044 | 0.76488686  | ANDROGEN_RESPONSE                | signaling          |
| HALLMARK_APICAL_SURFACE                   | 26   | -0.9520981 | 0.7780008   | APICAL_SURFACE                   | cellular component |
| HALLMARK_KRAS_SIGNALING_UP                | 123  | -0.9037519 | 0.8283934   | KRAS_SIGNALING_UP                | signaling          |
| HALLMARK_TGF_BETA_SIGNALING               | 48   | -1.0094684 | 0.84966916  | TGF_BETA_SIGNALING               | signaling          |
| HALLMARK_PI3K_AKT_MTOR_SIGNALING          | 92   | 0.83679307 | 0.9083634   | PI3K_AKT_MTOR_SIGNALING          | signaling          |
| HALLMARK_WNT_BETA_CATENIN_SIGNALING       | 30   | 0.8222267  | 0.9099532   | WNT_BETA_CATENIN_SIGNALING       | signaling          |
| HALLMARK_KRAS_SIGNALING_DN                | 72   | 0.844743   | 0.91847396  | KRAS_SIGNALING_DN                | signaling          |
| HALLMARK_IL6_JAK_STAT3_SIGNALING          | 65   | 0.79050213 | 0.93626595  | IL6_JAK_STAT3_SIGNALING          | immune             |
| HALLMARK_HEDGEHOG_SIGNALING               | 21   | 0.84735936 | 0.9408993   | HEDGEHOG_SIGNALING               | signaling          |
| HALLMARK_COMPLEMENT                       | 156  | 0.76320857 | 0.9481598   | COMPLEMENT                       | immune             |
| HALLMARK_IL2_STAT5_SIGNALING              | 158  | 0.74106455 | 0.9485353   | IL2_STAT5_SIGNALING              | signaling          |
| HALLMARK_INFLAMMATORY_RESPONSE            | 143  | 0.6850725  | 0.96872264  | INFLAMMATORY_RESPONSE            | immune             |

**Table S5A: Predicted Probabilities of Lasso Base Model (Age, Gender, Mutation Status)**

| Sample# | DelD | Prob.MF     | Prob.CTRL   | Prob.ET     | Prob.PV     | Predicted.Label | True.Label |
|---------|------|-------------|-------------|-------------|-------------|-----------------|------------|
| S1428   |      | 0.72463124  | 2.41E-08    | 0.070519432 | 0.204849304 | MF              | MF         |
| S990146 |      | 0.215659422 | 0.708605109 | 0.075733984 | 1.48E-06    | CTRL            | CTRL       |
| S7542   |      | 0.533503343 | 7.10E-09    | 0.466496595 | 5.52E-08    | MF              | ET         |
| S0105   |      | 0.85252     | 2.51E-09    | 0.14747999  | 6.66E-09    | MF              | MF         |
| S3039   |      | 0.056567154 | 3.76E-08    | 0.451098397 | 0.492334411 | PV              | MF         |
| S6784   |      | 0.207247245 | 2.47E-08    | 0.081579043 | 0.711173687 | PV              | MF         |
| S6544   |      | 0.270275612 | 1.44E-08    | 0.048769711 | 0.680954662 | PV              | PV         |
| S8075   |      | 0.174742547 | 1.31E-08    | 0.167745461 | 0.657511979 | PV              | ET         |
| S6398   |      | 0.574564107 | 1.90E-08    | 0.212942309 | 0.212493565 | MF              | ET         |
| S7033   |      | 0.76804637  | 1.00E-09    | 0.231953623 | 5.76E-09    | MF              | ET         |
| S990145 |      | 0.133824878 | 0.616157626 | 0.25001612  | 1.38E-06    | CTRL            | CTRL       |
| S5385   |      | 0.735574218 | 7.70E-09    | 0.08945948  | 0.174966294 | MF              | MF         |
| S8676   |      | 0.803311737 | 4.22E-09    | 0.050064493 | 0.146623766 | MF              | PV         |
| S1765.y |      | 0.646282024 | 1.35E-08    | 0.153382603 | 0.200335359 | MF              | MF         |
| S7782   |      | 0.807425128 | 1.07E-08    | 0.032222196 | 0.160352665 | MF              | PV         |
| S3147   |      | 0.779750326 | 1.46E-08    | 0.043469588 | 0.176780072 | MF              | MF         |
| S990147 |      | 0.006784112 | 0.893179214 | 0.100035242 | 1.43E-06    | CTRL            | CTRL       |
| S5702   |      | 0.009539467 | 0.889763967 | 0.100694801 | 1.76E-06    | CTRL            | ET         |
| S990150 |      | 0.005402597 | 0.895044774 | 0.099551383 | 1.25E-06    | CTRL            | CTRL       |
| S990149 |      | 0.179422458 | 0.741838283 | 0.07873791  | 1.35E-06    | CTRL            | CTRL       |
| S2541   |      | 0.008094881 | 1.53E-08    | 0.208944436 | 0.782960667 | PV              | ET         |
| S1562   |      | 0.233223038 | 1.97E-08    | 0.065717981 | 0.701058961 | PV              | MF         |
| S8016   |      | 0.23566708  | 0.690297758 | 0.07403361  | 1.55E-06    | CTRL            | ET         |
| S0574   |      | 0.005636387 | 2.13E-08    | 0.283906456 | 0.710457136 | PV              | PV         |
| S5311   |      | 0.679527782 | 1.41E-09    | 0.320472211 | 6.08E-09    | MF              | MF         |
| S0359   |      | 0.646282024 | 1.35E-08    | 0.153382603 | 0.200335359 | MF              | MF         |
| S8413   |      | 0.166509902 | 1.40E-08    | 0.178683538 | 0.654806546 | PV              | MF         |
| S990144 |      | 0.386802572 | 0.560754705 | 0.052442461 | 2.62E-07    | CTRL            | CTRL       |
| S990142 |      | 0.065013348 | 0.848043174 | 0.086942718 | 7.60E-07    | CTRL            | CTRL       |
| S8702   |      | 0.198949623 | 2.66E-08    | 0.087543785 | 0.713506565 | PV              | PV         |
| S3335   |      | 0.135728957 | 1.80E-08    | 0.227450256 | 0.636820769 | PV              | PV         |
| S7297   |      | 0.712129102 | 2.66E-08    | 0.077471657 | 0.210399214 | MF              | MF         |
| S2657   |      | 0.678559055 | 1.12E-08    | 0.128871522 | 0.192569411 | MF              | MF         |
| S1522   |      | 0.889803236 | 4.64E-10    | 0.110196759 | 4.69E-09    | MF              | MF         |
| S1765.z |      | 0.646282024 | 1.35E-08    | 0.153382603 | 0.200335359 | MF              | MF         |
| S990143 |      | 0.179422458 | 0.741838283 | 0.07873791  | 1.35E-06    | CTRL            | CTRL       |
| S8571   |      | 0.72463124  | 2.41E-08    | 0.070519432 | 0.204849304 | MF              | PV         |
| S990140 |      | 0.313325334 | 0.505826547 | 0.180847829 | 2.90E-07    | CTRL            | CTRL       |
| S7428   |      | 0.175168261 | 3.31E-08    | 0.107674955 | 0.717156751 | PV              | PV         |
| S9059   |      | 0.693754412 | 1.03E-08    | 0.117864416 | 0.188381162 | MF              | MF         |
| S0103   |      | 0.736623778 | 2.18E-08    | 0.064127621 | 0.199248579 | MF              | ET         |
| S5881   |      | 0.712129102 | 2.66E-08    | 0.077471657 | 0.210399214 | MF              | PV         |
| S990148 |      | 0.499403466 | 0.457237593 | 0.043358658 | 2.83E-07    | MF              | CTRL       |
| S6482   |      | 0.611558786 | 1.61E-08    | 0.181374804 | 0.207066394 | MF              | PV         |
| S6952   |      | 0.664890449 | 0.30552776  | 0.029581501 | 2.89E-07    | MF              | MF         |
| S9313.y |      | 0.183182968 | 1.22E-08    | 0.157305841 | 0.659511178 | PV              | PV         |
| S2308   |      | 0.735574218 | 7.70E-09    | 0.08945948  | 0.174966294 | MF              | ET         |
| S6874   |      | 0.182908513 | 3.08E-08    | 0.100577501 | 0.716513955 | PV              | MF         |
| S2946   |      | 0.815845484 | 9.65E-09    | 0.029125167 | 0.155029339 | MF              | ET         |

**Table S5B: Predicted Probabilities of Lasso Model with the Entire Transcriptome**

| Sample# | Del | Prob.MF    | Prob.CTRL  | Prob.ET    | Prob.PV    | Predicted.Label | True.Label |
|---------|-----|------------|------------|------------|------------|-----------------|------------|
| S3147   |     | 0.12395032 | 0.06361095 | 0.09790658 | 0.71453214 | PV              | MF         |
| S7033   |     | 0.19659506 | 0.08203161 | 0.22459043 | 0.4967829  | PV              | ET         |
| S7428   |     | 0.06388445 | 0.05482461 | 0.13857067 | 0.74272027 | PV              | PV         |
| S6544   |     | 0.01264897 | 0.02531482 | 0.04853313 | 0.91350308 | PV              | PV         |
| S0359   |     | 0.05075509 | 0.03008909 | 0.04769623 | 0.8714596  | PV              | MF         |
| S6482   |     | 0.03318443 | 0.03831813 | 0.08172735 | 0.8467701  | PV              | PV         |
| S6874   |     | 0.6565228  | 8.44E-05   | 0.02096776 | 0.32242508 | MF              | MF         |
| S8702   |     | 0.00560781 | 0.00202412 | 0.00347268 | 0.98889539 | PV              | PV         |
| S990148 |     | 0.02070988 | 0.89551519 | 0.0412124  | 0.04256253 | CTRL            | CTRL       |
| S8676   |     | 0.00688092 | 0.00571897 | 0.0101142  | 0.97728591 | PV              | PV         |
| S7297   |     | 0.70371895 | 0.00010441 | 0.01761245 | 0.27856419 | MF              | MF         |
| S2946   |     | 0.02586105 | 0.02701811 | 0.59058045 | 0.35654039 | ET              | ET         |
| S3335   |     | 0.02952875 | 0.05703482 | 0.19155367 | 0.72188276 | PV              | PV         |
| S3039   |     | 0.23361967 | 0.00017637 | 0.03511815 | 0.73108582 | PV              | MF         |
| S1562   |     | 0.0589415  | 2.72E-05   | 0.07769311 | 0.86333823 | PV              | MF         |
| S8413   |     | 0.69923559 | 0.00018365 | 0.03854927 | 0.2620315  | MF              | MF         |
| S990144 |     | 0.00931965 | 0.94026804 | 0.03396616 | 0.01644615 | CTRL            | CTRL       |
| S1765.y |     | 0.90660249 | 8.97E-05   | 0.02020768 | 0.07310016 | MF              | MF         |
| S6952   |     | 0.28272304 | 0.00010059 | 0.06797471 | 0.64920165 | PV              | MF         |
| S990150 |     | 0.04668521 | 0.66484371 | 0.14354843 | 0.14492265 | CTRL            | CTRL       |
| S990142 |     | 0.03484686 | 0.70948013 | 0.12376817 | 0.13190485 | CTRL            | CTRL       |
| S990147 |     | 0.02387115 | 0.82905306 | 0.10868893 | 0.03838686 | CTRL            | CTRL       |
| S2657   |     | 0.21022434 | 0.14793153 | 0.35334701 | 0.28849713 | ET              | MF         |
| S990145 |     | 0.04457762 | 0.55890729 | 0.31135881 | 0.08515628 | CTRL            | CTRL       |
| S0103   |     | 0.09417498 | 0.15376317 | 0.36503756 | 0.38702429 | PV              | ET         |
| S1428   |     | 0.62708746 | 0.00014542 | 0.02790394 | 0.34486318 | MF              | MF         |
| S5385   |     | 0.77873205 | 0.00010495 | 0.02608396 | 0.19507904 | MF              | MF         |
| S9059   |     | 0.19711924 | 2.16E-05   | 0.00628247 | 0.79657665 | PV              | MF         |
| S5311   |     | 0.93289883 | 6.17E-05   | 0.01392972 | 0.0531097  | MF              | MF         |
| S0574   |     | 0.01840554 | 0.02799563 | 0.10456313 | 0.8490357  | PV              | PV         |
| S2308   |     | 0.00510199 | 0.00525284 | 0.01752037 | 0.97212481 | PV              | ET         |
| S990146 |     | 0.08880267 | 0.35034659 | 0.43806959 | 0.12278115 | ET              | CTRL       |
| S8016   |     | 0.01332511 | 0.02108113 | 0.36751933 | 0.59807443 | PV              | ET         |
| S8075   |     | 0.03637302 | 0.11283222 | 0.25223217 | 0.59856259 | PV              | ET         |
| S9313.y |     | 0.01265993 | 0.01520904 | 0.05035531 | 0.92177573 | PV              | PV         |
| S2541   |     | 0.06394786 | 0.13346632 | 0.32592943 | 0.4766564  | PV              | ET         |
| S1522   |     | 0.25669537 | 0.1920827  | 0.29396999 | 0.25725194 | ET              | MF         |
| S5702   |     | 0.03994486 | 0.76294024 | 0.11564505 | 0.08146986 | CTRL            | ET         |
| S1765.z |     | 0.88281977 | 0.00010015 | 0.020947   | 0.09613309 | MF              | MF         |
| S5881   |     | 0.17256702 | 6.51E-05   | 0.05169277 | 0.77567515 | PV              | PV         |
| S990149 |     | 0.04579218 | 0.6788359  | 0.13618693 | 0.13918499 | CTRL            | CTRL       |
| S990143 |     | 0.00996377 | 0.88831275 | 0.07604564 | 0.02567785 | CTRL            | CTRL       |
| S7782   |     | 0.0496517  | 0.0449496  | 0.11325015 | 0.79214856 | PV              | PV         |
| S990140 |     | 0.05219702 | 0.47797688 | 0.32468732 | 0.14513878 | CTRL            | CTRL       |
| S0105   |     | 0.15503438 | 0.08436133 | 0.53905446 | 0.22154983 | ET              | MF         |
| S7542   |     | 0.11561118 | 0.12378457 | 0.54402197 | 0.21658227 | ET              | ET         |
| S8571   |     | 0.34181523 | 4.62E-05   | 0.00959242 | 0.64854619 | PV              | PV         |
| S6784   |     | 0.59728542 | 0.00010083 | 0.02811422 | 0.37449953 | MF              | MF         |
| S6398   |     | 0.05058235 | 0.09084023 | 0.47936468 | 0.37921274 | ET              | ET         |

**Table S5C: Predicted Probabilities of Lasso Model with the Progressive Transcriptome**

| Sample# | DelD | Prob.MF     | Prob.CTRL   | Prob.ET     | Prob.PV     | Predicted.Label | True.Label |
|---------|------|-------------|-------------|-------------|-------------|-----------------|------------|
| S3147   |      | 0.092073998 | 0.00493465  | 0.031344267 | 0.871647085 | PV              | MF         |
| S7033   |      | 0.159484242 | 0.013514786 | 0.11672636  | 0.710274612 | PV              | ET         |
| S7428   |      | 0.018488282 | 0.008499175 | 0.125530701 | 0.847481841 | PV              | PV         |
| S6544   |      | 0.001328213 | 0.002355917 | 0.028773588 | 0.967542283 | PV              | PV         |
| S0359   |      | 0.010627975 | 0.001140442 | 0.001253889 | 0.986977693 | PV              | MF         |
| S6482   |      | 0.004419731 | 0.009786142 | 0.179595073 | 0.806199054 | PV              | PV         |
| S6874   |      | 0.217134582 | 1.28E-05    | 0.003925044 | 0.778927546 | PV              | MF         |
| S8702   |      | 0.03779986  | 0.00271328  | 0.026403773 | 0.933083087 | PV              | PV         |
| S990148 |      | 0.001265836 | 0.977512385 | 0.015728321 | 0.005493459 | CTRL            | CTRL       |
| S8676   |      | 0.002146306 | 0.000258697 | 0.001015756 | 0.996579241 | PV              | PV         |
| S7297   |      | 0.386461413 | 6.85E-05    | 0.013583582 | 0.599886493 | PV              | MF         |
| S2946   |      | 0.002646809 | 0.001465367 | 0.049279281 | 0.946608543 | PV              | ET         |
| S3335   |      | 0.000551306 | 0.001708487 | 0.904558334 | 0.093181873 | ET              | PV         |
| S3039   |      | 0.083757526 | 0.000348078 | 0.268427663 | 0.647466732 | PV              | MF         |
| S1562   |      | 0.110977219 | 4.04E-05    | 0.006545455 | 0.882436965 | PV              | MF         |
| S8413   |      | 0.219666538 | 6.68E-05    | 0.019332678 | 0.760933953 | PV              | MF         |
| S990144 |      | 9.25E-05    | 0.991629353 | 0.007701818 | 0.000576321 | CTRL            | CTRL       |
| S1765.y |      | 0.919405903 | 5.09E-05    | 0.013330491 | 0.067212723 | MF              | MF         |
| S6952   |      | 0.023268789 | 4.25E-05    | 0.098810469 | 0.877878287 | PV              | MF         |
| S990150 |      | 0.008180225 | 0.891813454 | 0.048001318 | 0.052005003 | CTRL            | CTRL       |
| S990142 |      | 0.010046736 | 0.840480139 | 0.109791528 | 0.039681596 | CTRL            | CTRL       |
| S990147 |      | 0.00273875  | 0.918542798 | 0.066699239 | 0.012019214 | CTRL            | CTRL       |
| S2657   |      | 0.055533721 | 0.016873468 | 0.251680583 | 0.675912228 | PV              | MF         |
| S990145 |      | 0.02068156  | 0.549791974 | 0.42137892  | 0.008147546 | CTRL            | CTRL       |
| S0103   |      | 0.041596134 | 0.034167556 | 0.583429166 | 0.340807143 | ET              | ET         |
| S1428   |      | 0.224592498 | 6.36E-05    | 0.011940365 | 0.763403542 | PV              | MF         |
| S5385   |      | 0.926392637 | 4.18E-05    | 0.011415157 | 0.062150377 | MF              | MF         |
| S9059   |      | 0.115405357 | 1.27E-05    | 0.00101406  | 0.883567923 | PV              | MF         |
| S5311   |      | 0.962316012 | 2.35E-05    | 0.015219642 | 0.022440855 | MF              | MF         |
| S0574   |      | 0.000797008 | 0.00142649  | 0.219763071 | 0.778013431 | PV              | PV         |
| S2308   |      | 0.002745334 | 0.001480741 | 0.28371321  | 0.712060714 | PV              | ET         |
| S990146 |      | 0.037220556 | 0.507160101 | 0.395266592 | 0.060352752 | CTRL            | CTRL       |
| S8016   |      | 0.001302611 | 0.002971883 | 0.132241562 | 0.863483943 | PV              | ET         |
| S8075   |      | 0.015486707 | 0.124415352 | 0.442418325 | 0.417679616 | ET              | ET         |
| S9313.y |      | 0.00193569  | 0.002765518 | 0.028682678 | 0.966616115 | PV              | PV         |
| S2541   |      | 0.037133276 | 0.176393665 | 0.251033344 | 0.535439715 | PV              | ET         |
| S1522   |      | 0.430429563 | 0.078512377 | 0.363995484 | 0.127062577 | MF              | MF         |
| S5702   |      | 0.010989962 | 0.774793968 | 0.15882085  | 0.05539522  | CTRL            | ET         |
| S1765.z |      | 0.928962973 | 7.08E-05    | 0.007488947 | 0.063477328 | MF              | MF         |
| S5881   |      | 0.021403102 | 3.44E-05    | 0.034411008 | 0.944151475 | PV              | PV         |
| S990149 |      | 0.004708259 | 0.691336231 | 0.210213379 | 0.09374213  | CTRL            | CTRL       |
| S990143 |      | 0.00038944  | 0.78654355  | 0.211859405 | 0.001207605 | CTRL            | CTRL       |
| S7782   |      | 0.009267968 | 0.009626422 | 0.144706684 | 0.836398926 | PV              | PV         |
| S990140 |      | 0.007793924 | 0.464113827 | 0.469603441 | 0.058488808 | ET              | CTRL       |
| S0105   |      | 0.150151999 | 0.042619713 | 0.485353304 | 0.321874984 | ET              | MF         |
| S7542   |      | 0.005179512 | 0.007342405 | 0.871411071 | 0.116067012 | ET              | ET         |
| S8571   |      | 0.034490309 | 5.56E-06    | 0.000692632 | 0.9648115   | PV              | PV         |
| S6784   |      | 0.23455979  | 9.07E-05    | 0.008421458 | 0.7569281   | PV              | MF         |
| S6398   |      | 0.023367024 | 0.025093319 | 0.169208568 | 0.782331089 | PV              | ET         |
